# Supplementary material for: Neogenkwanines A–H: daphnane-type diterpenes containing 4,7 or 4,6-ether groups from the flower bud of Daphne genkwa
Source: Royal Society of Chemistry journal article supplement (doi:10.1039/c4ra13167c), 2014-12-05

## Electronic Supplementary Information

### Neogenkwanines A–H: Daphnane-Type Diterpenes Containing 4,7 or 4,6- Ether Group from the Flower Bud of *Daphne genkwa*

Ling-Zhi Li<sup>a,b</sup>, Shao-Jiang Song<sup>a,b,\*</sup>, Pin-Yi Gao<sup>c</sup>, Fei-Fei Li<sup>a,b</sup>, Li-Hui Wang<sup>d</sup>, Qing-Bo Liu<sup>a,b</sup>, Xiao-Xiao Huang<sup>a,b</sup>, Dan-Qi Li<sup>a,b</sup>, Yu Sun<sup>a,b</sup>

<sup>a</sup>*School of Traditional Chinese Materia Medica, Shenyang Pharmaceutical University,  
103 Wenhua Rd., Shenyang 110016, People's Republic of China*

<sup>b</sup>*Key Laboratory of Structure-Based Drug Design and Discovery, Ministry of  
Education, Shenyang Pharmaceutical University, 103 Wenhua Rd., Shenyang  
110016, People's Republic of China*

<sup>c</sup>*College of Pharmaceutical and Biological Engineering, Shenyang University of  
Chemical Technology, Shenyang 110142, People's Republic of China*

<sup>d</sup>*School of Life Science and Biopharmaceuticals, Shenyang Pharmaceutical  
University, 103 Wenhua Rd., Shenyang 110016, People's Republic of China*

*\*To whom correspondence should be addressed. (S.-J. Song) E-mail:  
songsj99@163.com. Tel: +86-24-23986510. Fax: +86-24-23986088*

**Table of Contents:**

1. HRESIMS spectrum of compound **1** .
2.  $^1\text{H}$  NMR spectrum for compound **1** recorded in  $\text{CDCl}_3$  at 600 MHz.
3.  $^{13}\text{C}$  NMR spectrum for compound **1** recorded in  $\text{CDCl}_3$  at 125 MHz.
4. HMBC spectrum for compound **1** recorded in  $\text{CDCl}_3$  at 600 MHz.
5. NOESY spectrum for compound **1** recorded in  $\text{CDCl}_3$  at 600 MHz.
6. Single crystal X-ray diffraction analysis of genkdaphnin A (**1**)
7. HRESIMS spectrum for compound **2** .
8.  $^1\text{H}$  NMR spectrum for compound **2** recorded in  $\text{CDCl}_3$  at 600 MHz.
9.  $^{13}\text{C}$  NMR spectrum for compound **2** recorded in  $\text{CDCl}_3$  at 125 MHz.
10. HSQC spectrum for compound **2** recorded in  $\text{CDCl}_3$  at 600 MHz.
11. HMBC spectrum for compound **2** recorded in  $\text{CDCl}_3$  at 600 MHz.
12. NOESY spectrum for compound **2** recorded in  $\text{CDCl}_3$  at 600 MHz.
13. HRESIMS spectrum for compound **3** .
14.  $^1\text{H}$  NMR spectrum for compound **3** recorded in  $\text{CDCl}_3$  at 600 MHz.
15.  $^{13}\text{C}$  NMR spectrum for compound **3** recorded in  $\text{CDCl}_3$  at 125 MHz.
16. HMBC spectrum for compound **3** recorded in  $\text{CDCl}_3$  at 600 MHz.
17. NOESY spectrum for compound **3** recorded in  $\text{CDCl}_3$  at 600 MHz.
18. H-H-COSY spectrum for compound **3** recorded in  $\text{CDCl}_3$  at 600 MHz.
19. HRESIMS spectrum for compound **4** .
20.  $^1\text{H}$  NMR spectrum for compound **4** recorded in  $\text{CDCl}_3$  at 600 MHz.
21.  $^{13}\text{C}$  NMR spectrum for compound **4** recorded in  $\text{CDCl}_3$  at 125 MHz.
22. HMBC spectrum for compound **4** recorded in  $\text{CDCl}_3$  at 600 MHz.
23. HRESIMS spectrum for compound **5** .
24.  $^1\text{H}$  NMR spectrum for compound **5** recorded in  $\text{CDCl}_3$  at 600 MHz.
25.  $^{13}\text{C}$  NMR spectrum for compound **5** recorded in  $\text{CDCl}_3$  at 125 MHz.
26. HMBC spectrum for compound **5** recorded in  $\text{CDCl}_3$  at 600 MHz.

Table of Contents

27. HRESIMS spectrum for compound **6**.
28. <sup>1</sup>H NMR spectrum for compound **6** recorded in CDCl<sub>3</sub> at 600 MHz.
29. <sup>13</sup>C NMR spectrum for compound **6** recorded in CDCl<sub>3</sub> at 125 MHz.
30. HMBC spectrum for compound **6** recorded in CDCl<sub>3</sub> at 600 MHz.
31. HRESIMS spectrum for compound **7**.
32. <sup>1</sup>H NMR spectrum for compound **8** recorded in CDCl<sub>3</sub> at 600 MHz.
33. <sup>13</sup>C NMR spectrum for compound **8** recorded in CDCl<sub>3</sub> at 125 MHz.
34. HSQC spectrum for compound **8** recorded in CDCl<sub>3</sub> at 600 MHz.
35. HMBC spectrum for compound **8** recorded in CDCl<sub>3</sub> at 600 MHz.
36. NOESY spectrum for compound **8** recorded in CDCl<sub>3</sub> at 600 MHz.
37. HRESIMS spectrum for compound **8**.
38. <sup>1</sup>H NMR spectrum for compound **8** recorded in CDCl<sub>3</sub> at 600 MHz.
39. <sup>13</sup>C NMR spectrum for compound **8** recorded in CDCl<sub>3</sub> at 125 MHz.
40. HSQC spectrum for compound **8** recorded in CDCl<sub>3</sub> at 600 MHz.
41. HMBC spectrum for compound **8** recorded in CDCl<sub>3</sub> at 600 MHz.
42. NOESY spectrum for compound **8** recorded in CDCl<sub>3</sub> at 600 MHz.
43. HRESIMS spectrum for compound **9**.
44. <sup>1</sup>H NMR spectrum for compound **9** recorded in CDCl<sub>3</sub> at 600 MHz.
45. <sup>13</sup>C NMR spectrum for compound **9** recorded in CDCl<sub>3</sub> at 125 MHz.
46. CD spectrum for compounds **1-8**
47. CD spectrum for the combination of several compounds
48. Stereoviews of compounds **1-8**

## 1:HRESIMS spectrum of compound 1

---

 Compound Mass Spectrum List Report
 

---

## Analysis Info

Analysis Name D:\data\songshaojiang\plotfiles\YH-22-A.d  
 Method tune\_low.m  
 Sample Name 3(c)-1.5h-MS  
 Comment

Acquisition Date 2009-7-7 17:58:38

Operator Bruker Customer  
 Instrument / Ser# micrOTOF-Q 125

## Acquisition Parameter

|             |          |                       |           |                  |           |
|-------------|----------|-----------------------|-----------|------------------|-----------|
| Source Type | ESI      | Ion Polarity          | Positive  | Set Nebulizer    | 0.4 Bar   |
| Focus       | Active   | Set Capillary         | 4500 V    | Set Dry Heater   | 190 °C    |
| Scan Begin  | 100 m/z  | Set End Plate Offset  | -500 V    | Set Dry Gas      | 4.0 l/min |
| Scan End    | 1000 m/z | Set Collision Cell RF | 120.0 Vpp | Set Divert Valve | Source    |

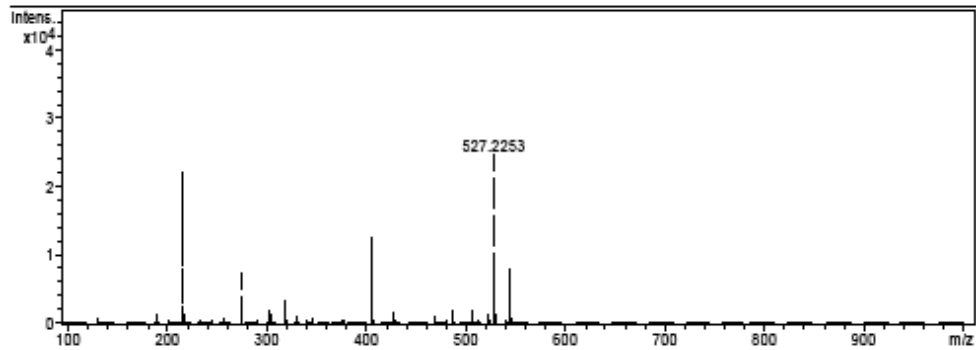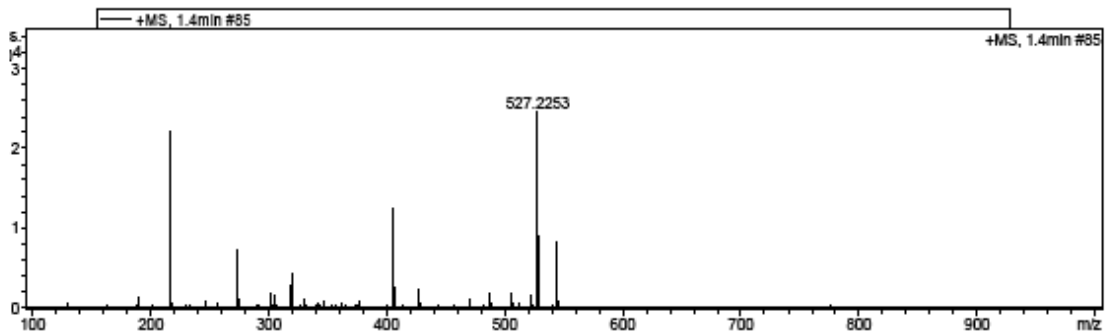

| # | m/z      | I     |
|---|----------|-------|
| 1 | 527.2253 | 24551 |

  

| Sum                | Formula | Sigma | m/z      | Err (ppm) | Mean Err (ppm) | Err (mDa) | rdb  | N Rule | e    |
|--------------------|---------|-------|----------|-----------|----------------|-----------|------|--------|------|
| C 27 H 36 Na 1 O 9 |         | 0.153 | 527.2252 | -0.22     | -0.22          | -0.12     | 9.50 | ok     | even |

2:  $^1\text{H}$  NMR spectrum for compound **1** recorded in  $\text{CDCl}_3$  at 600 MHz.

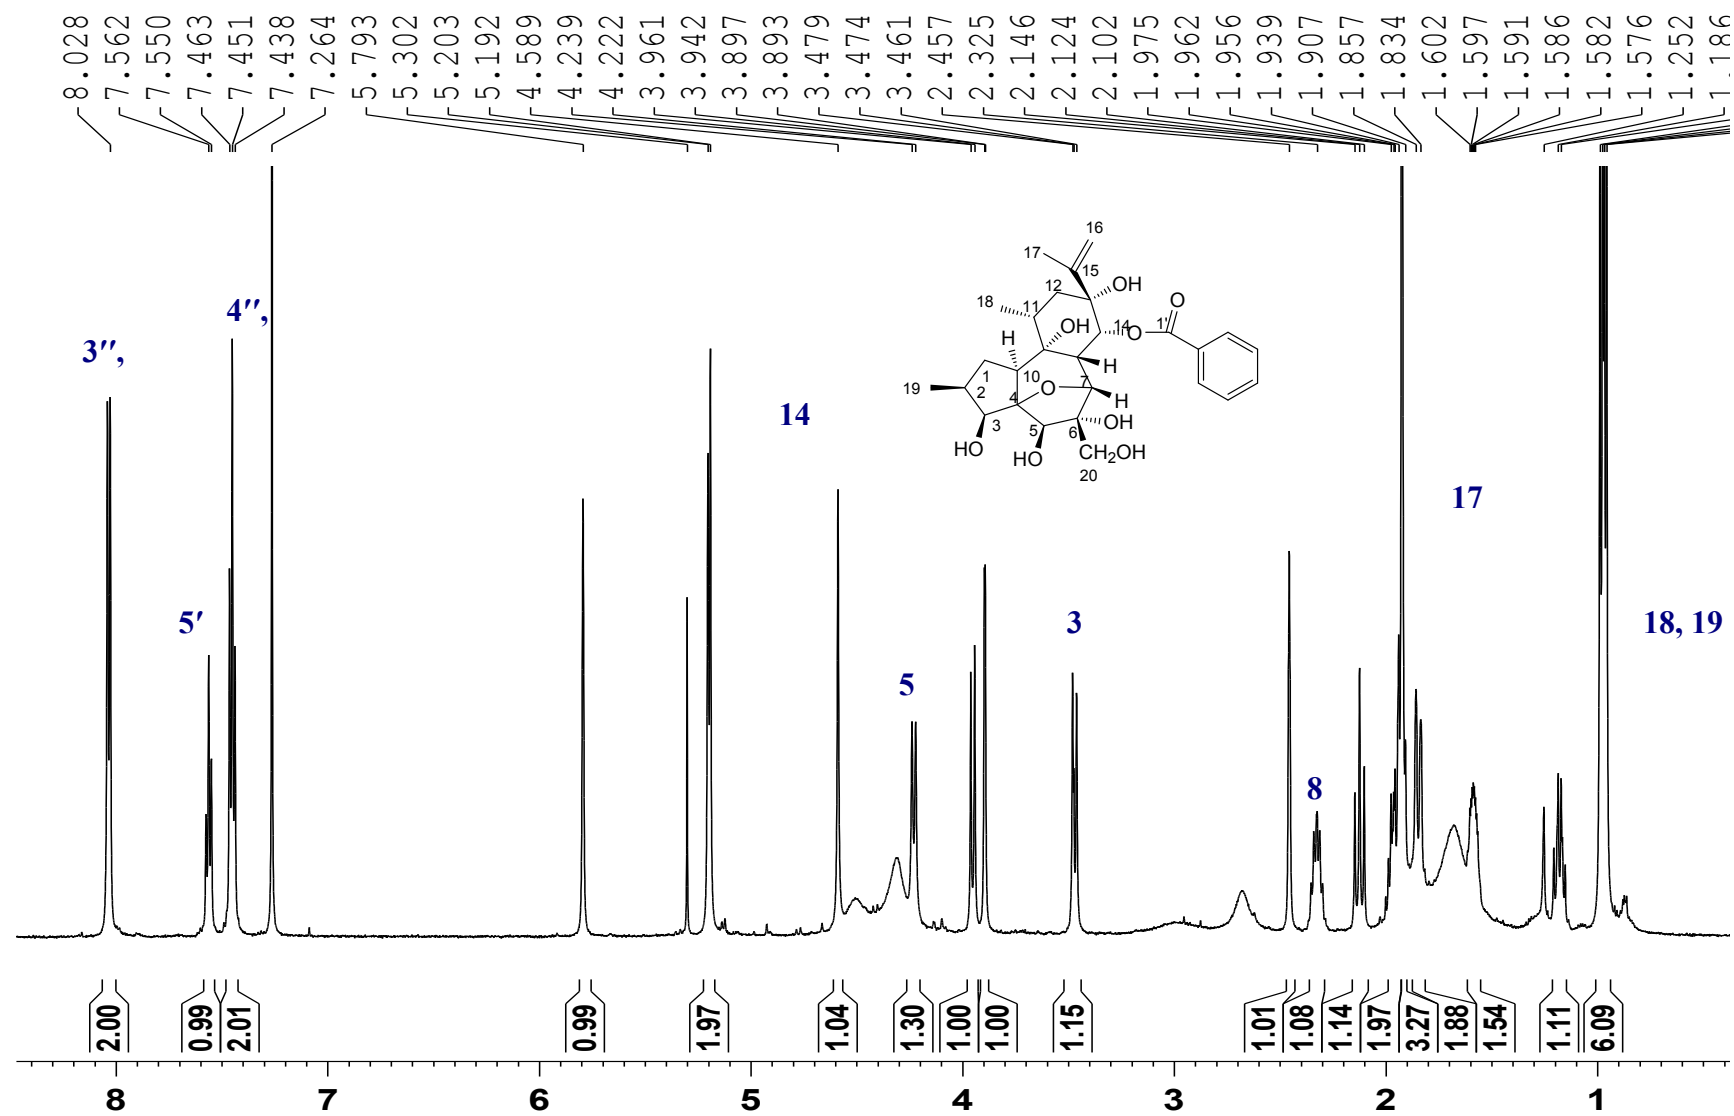

3:  $^{13}\text{C}$  NMR spectrum for compound **1** recorded in  $\text{CDCl}_3$  at 125 MHz.

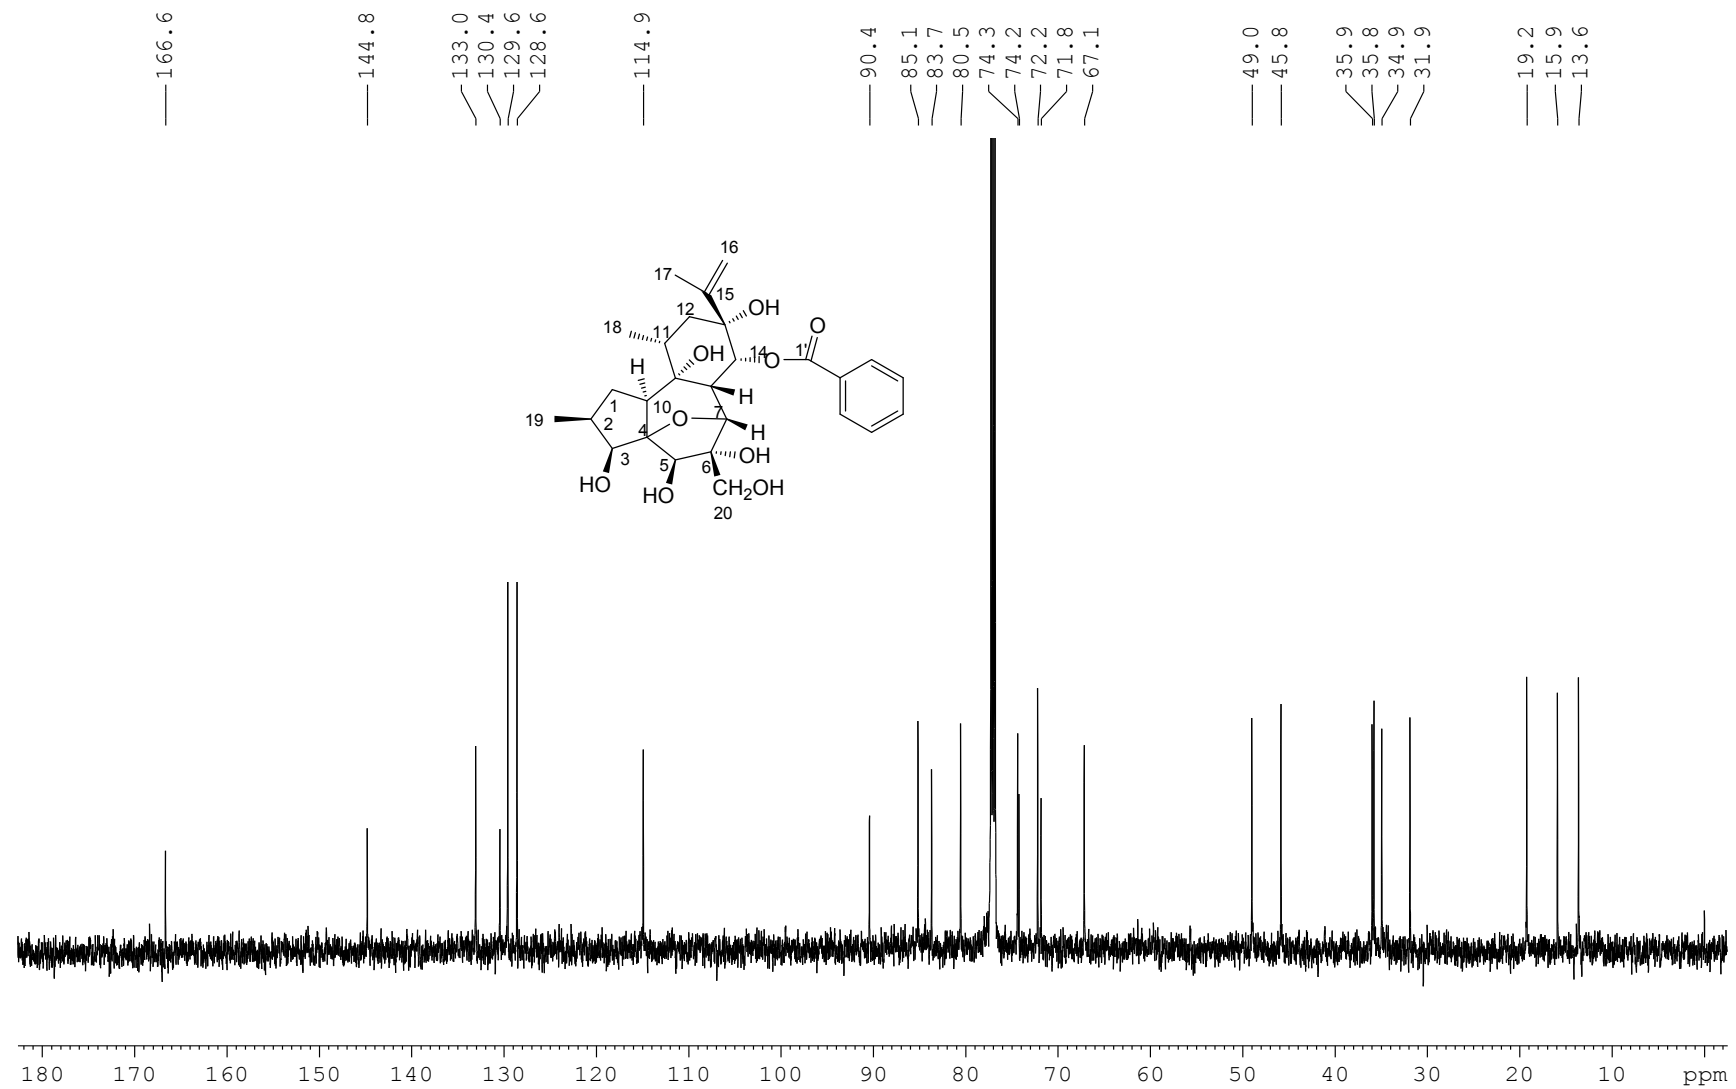

4:HMBC spectrum for compound **1** recorded in CDCl<sub>3</sub> at 600 MHz.

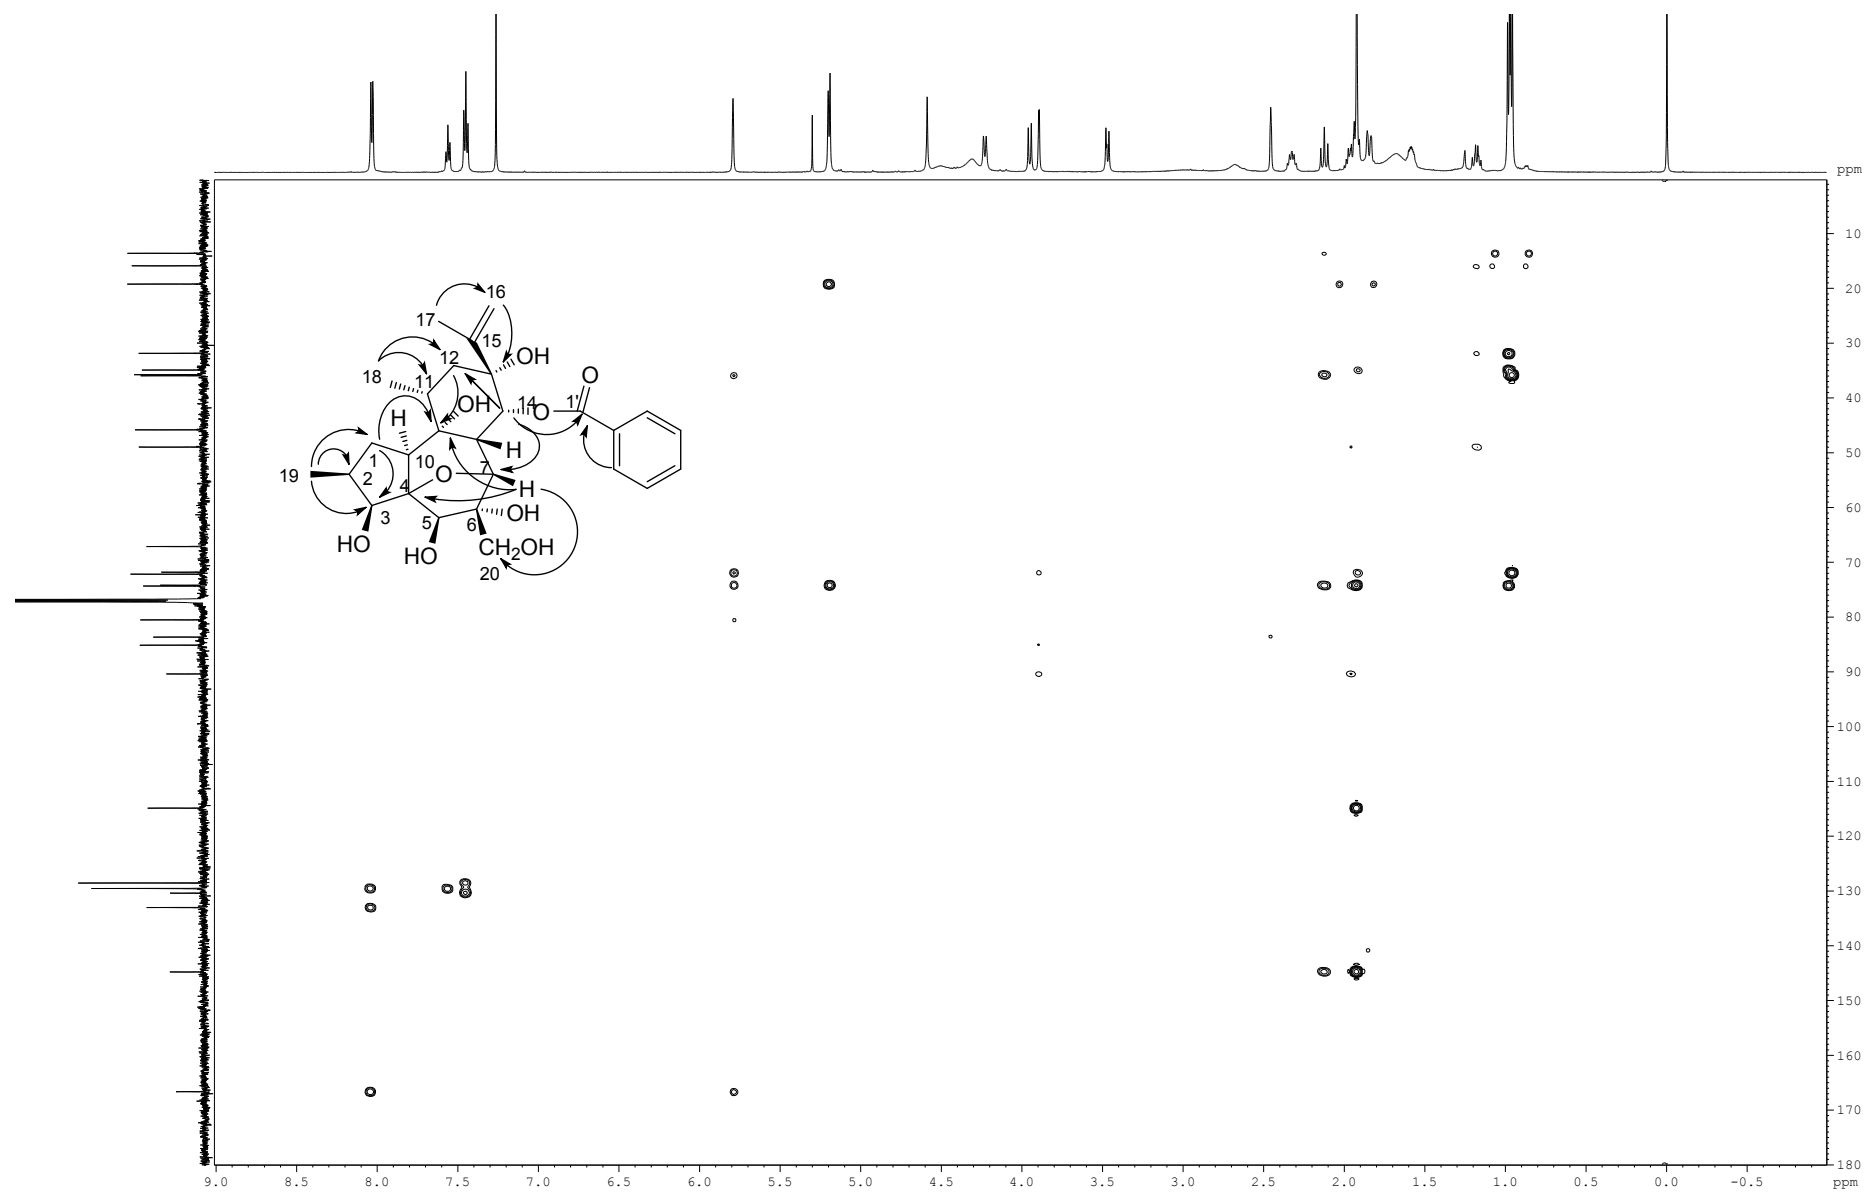

5:NOESY spectrum for compound **1** recorded in CDCl<sub>3</sub> at 600 MHz.

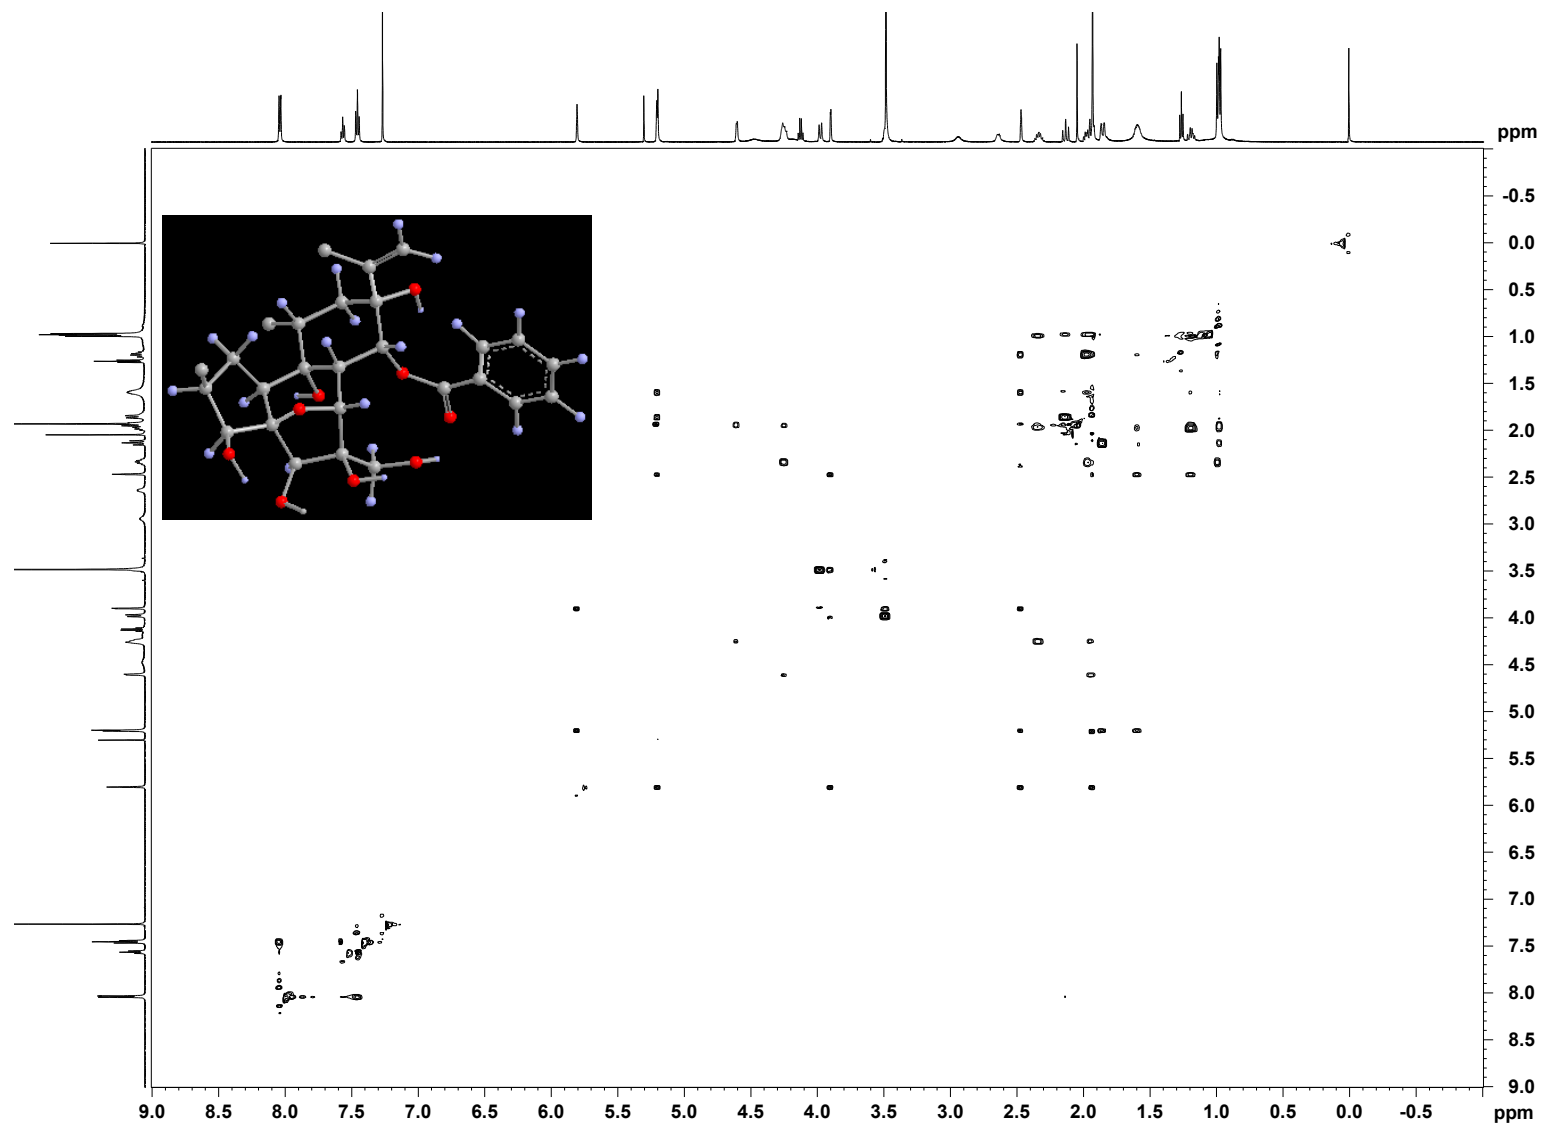



## 6. Single crystal X-ray diffraction analysis of genkdaphnin A (1)

Crystallization of genkdaphnin A (1) from n-hexane/ethyl acetate gave flaky cocrystal (1: 1) of 1 and ethyl acetate. All measurements were made on a Bruker SMART APEX-II with RAPID diffractometer using filtered  $\text{CuK}\alpha$  radiation ( $\lambda = 1.54187 \text{ \AA}$ ). Crystal data: Formula  $\text{C}_{27}\text{H}_{36}\text{O}_9$ , Formula weight 504.24, Orthorhombic system, Space group: P 21 21 21,  $a = 11.7035(7) \text{ \AA}$ ,  $b = 12.7664(9) \text{ \AA}$ ,  $c = 21.1157(14) \text{ \AA}$ ,  $\alpha = \beta = \gamma = 90.00^\circ$ ,  $V = 3154.9(4) \text{ \AA}^3$ ,  $Z = 4$ ,  $T = 296(2) \text{ K}$ ,  $d = 1.248 \text{ g cm}^{-3}$ , specimen:  $0.05 \times 0.20 \times 0.010 \text{ mm}^3$ . The total number of independent reflections measured was 9697, 4408 reflections unique, of which 4183 were observed ( $|F|^2 \geq 2\sigma|F|^2$ ). All calculations were performed using Crystal Structure except for refinement, which was performed using direct method SHELXL-97, expanded by using difference Fourier techniques, and refined by the full-matrix least-squares calculations. The non-hydrogen atoms were refined anisotropically, and hydrogen atoms were included at their calculated positions. The final indices were  $R_1 = 0.0429$ ,  $wR_2 = 0.1181$  ( $w = 1/\sigma|F|^2$ ),  $S = 1.030$ . Crystallographic data for genkdaphnin A (1) have been deposited at the Shanghai Institute of Pharmaceutical Industry.

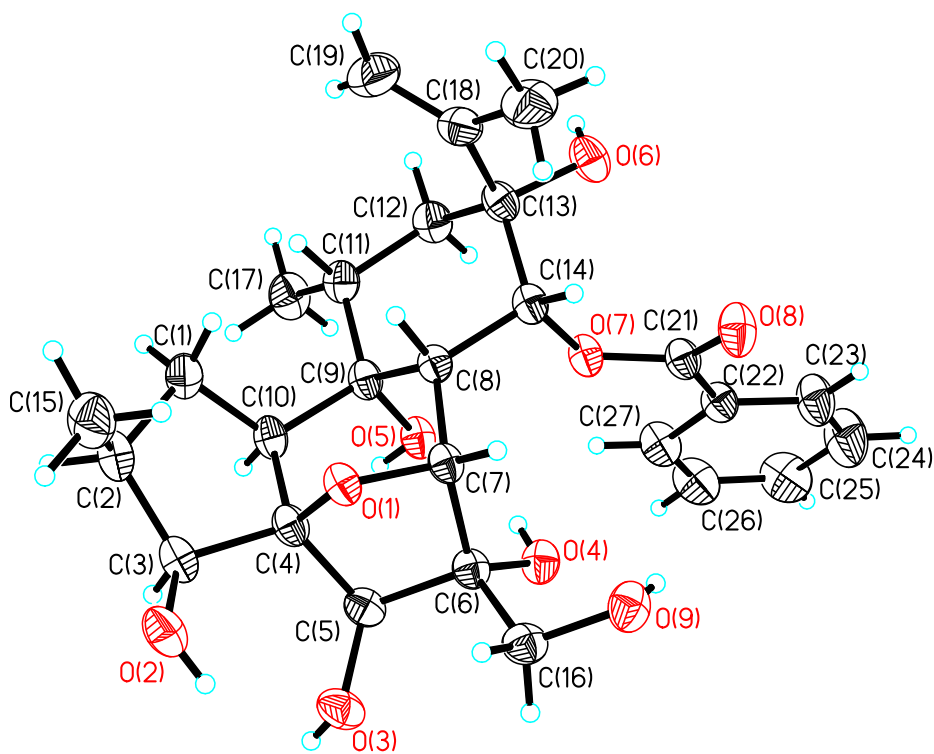

ORTEP drawing of genkdaphnin A (1).

## 7:HRESIMS spectrum for compound 2

---

 Compound Mass Spectrum List Report
 

---

## Analysis Info

Analysis Name D:\李玲芝\yhtp\YH-22-D.d  
 Method tune\_low.m  
 Sample Name sg  
 Comment

Acquisition Date 2008-11-11 13:41:49

Operator Bruker Customer  
 Instrument / Ser# micrOTOF-Q 125

## Acquisition Parameter

|             |          |                       |          |                  |           |
|-------------|----------|-----------------------|----------|------------------|-----------|
| Source Type | ESI      | Ion Polarity          | Positive | Set Nebulizer    | 0.4 Bar   |
| Focus       | Active   | Set Capillary         | 4500 V   | Set Dry Heater   | 190 癩     |
| Scan Begin  | 50 m/z   | Set End Plate Offset  | -500 V   | Set Dry Gas      | 4.0 l/min |
| Scan End    | 3000 m/z | Set Collision Cell RF | 35.0 Vpp | Set Divert Valve | Source    |

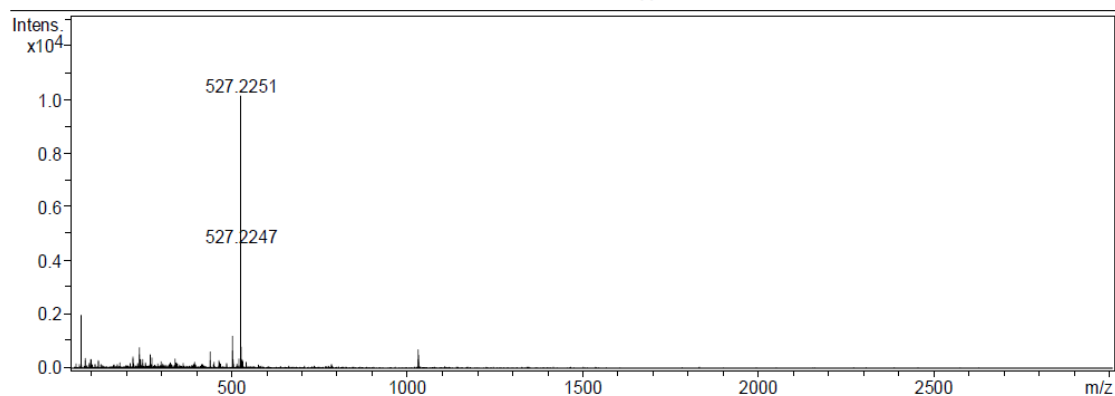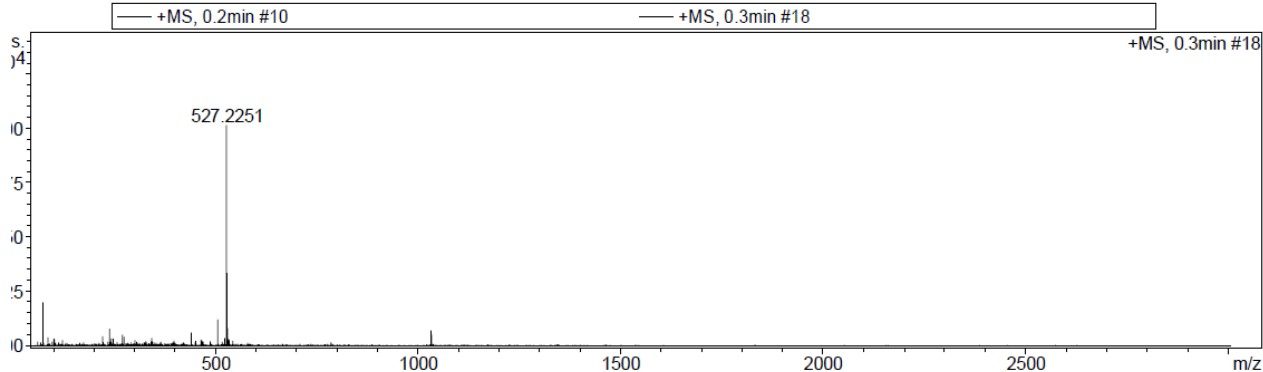

| # | m/z      | I    |
|---|----------|------|
| 1 | 527.2247 | 4471 |

| # | m/z      | I     |
|---|----------|-------|
| 1 | 527.2251 | 10117 |

| Sum  | Formula | Sigma | m/z | Err [ppm] | Mean Err [ppm] | Err [mDa] | rdB  | N Rule | e    |    |      |
|------|---------|-------|-----|-----------|----------------|-----------|------|--------|------|----|------|
| C 27 | H 36    | Na 1  | O 9 | 0.153     | 527.2252       | 0.15      | 0.15 | 0.08   | 9.50 | ok | even |

8:  $^1\text{H}$  NMR spectrum for compound **2** recorded in  $\text{CDCl}_3$  at 600 MHz.

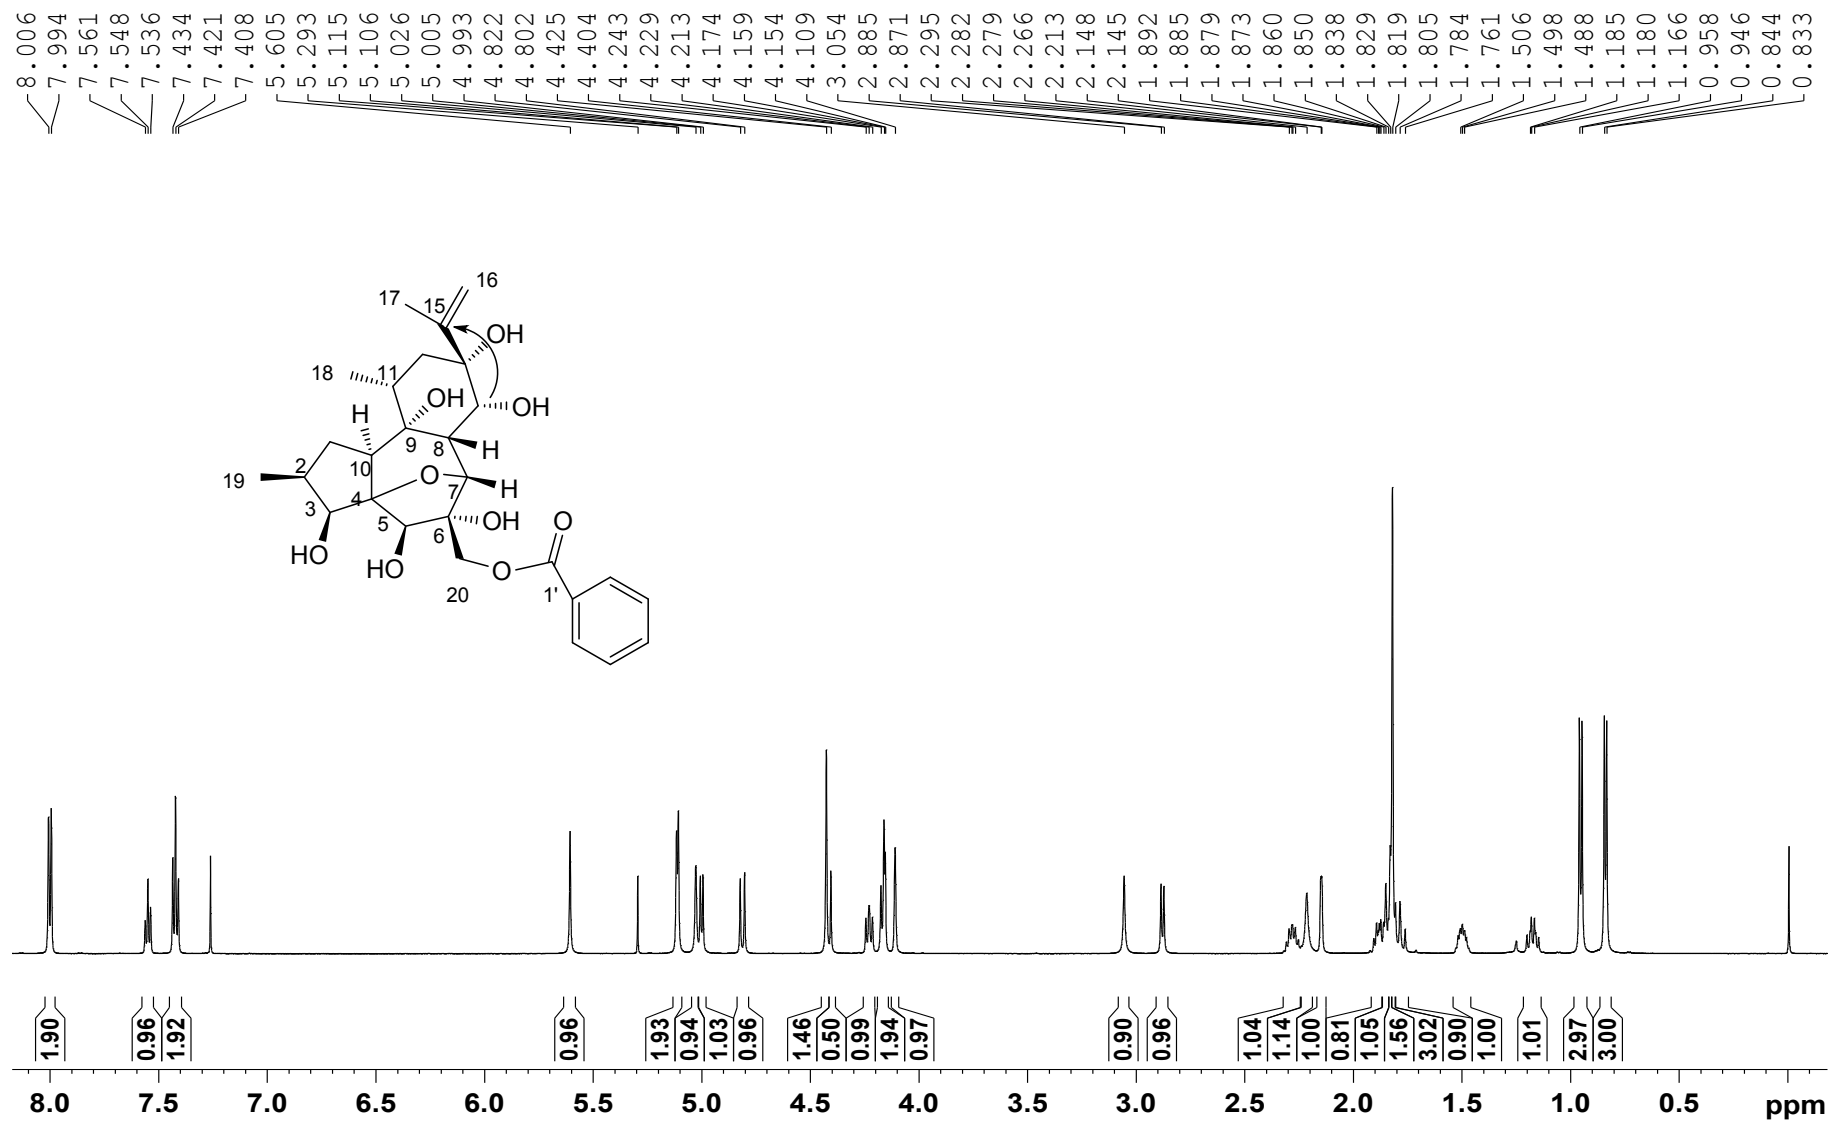

9:  $^{13}\text{C}$  NMR spectrum for compound **2** recorded in  $\text{CDCl}_3$  at 125 MHz.

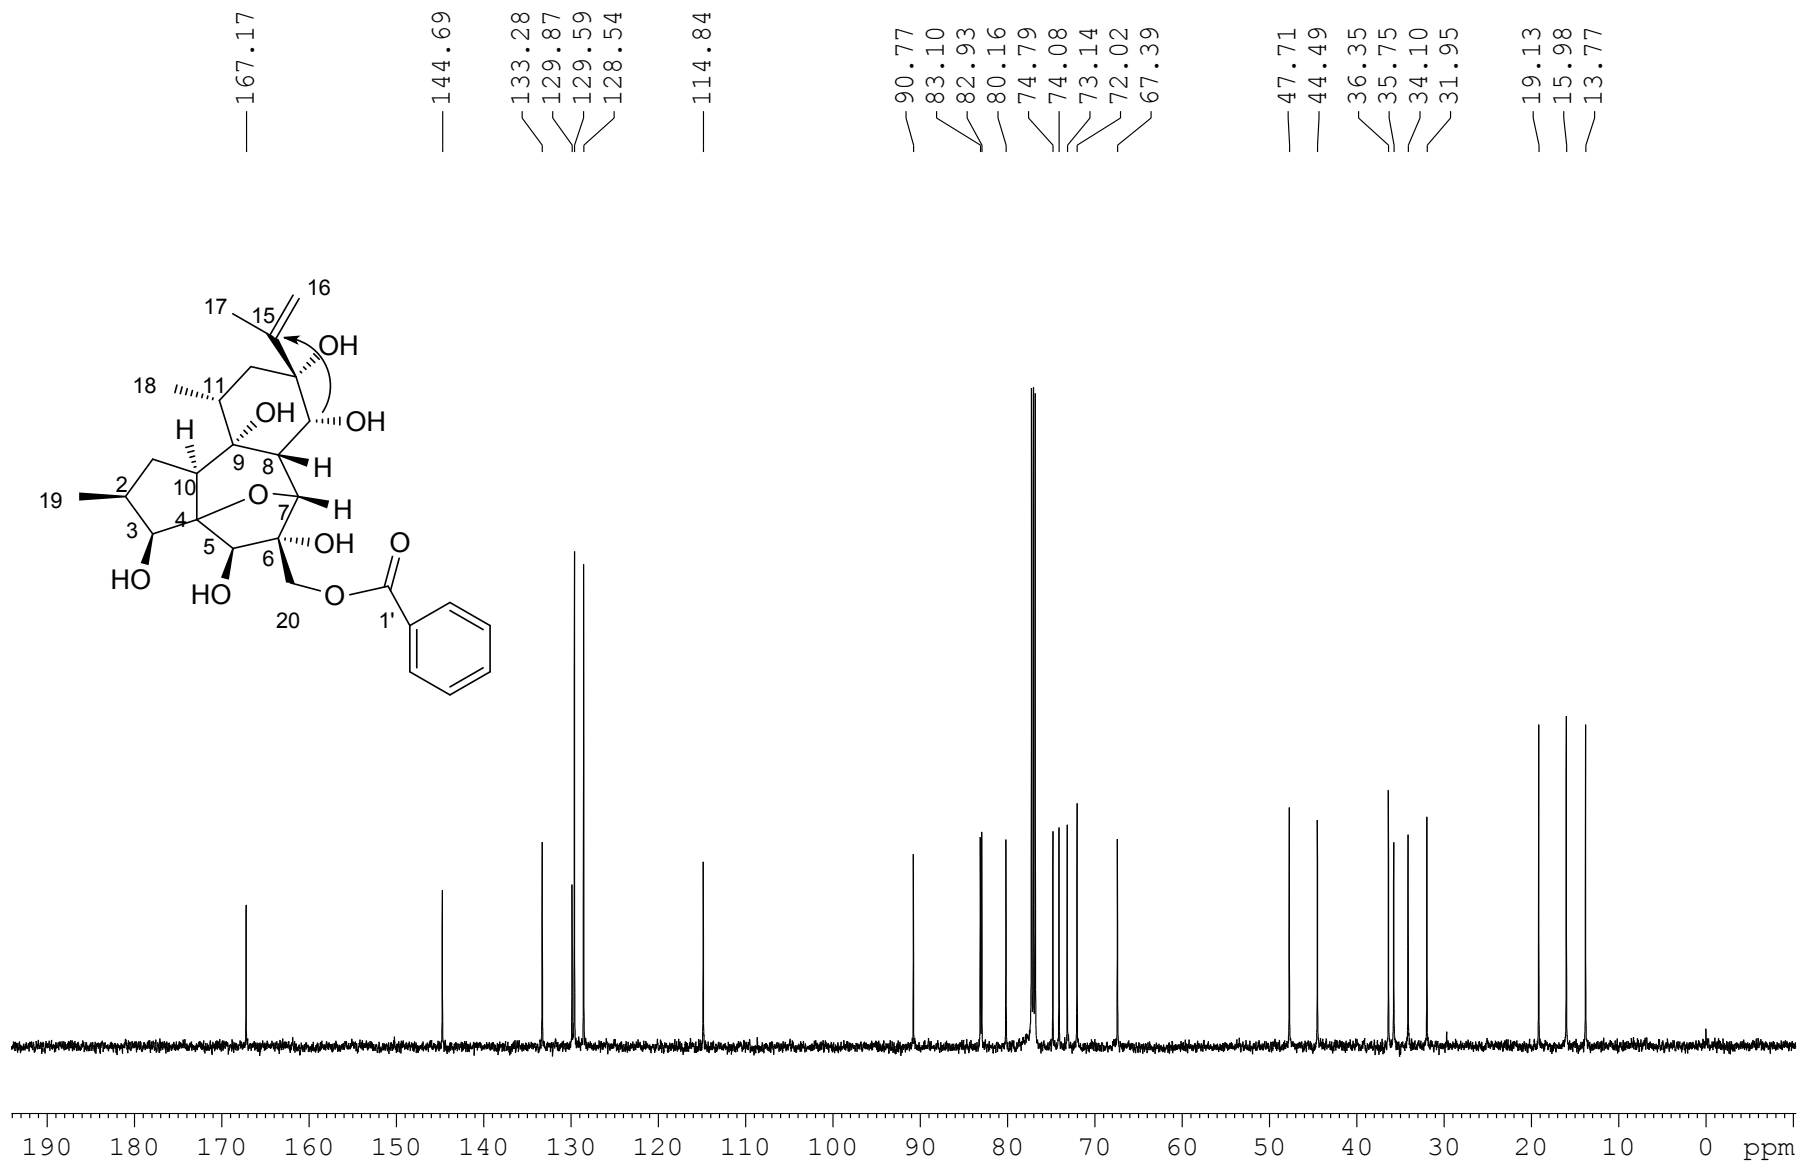

10:HSQC spectrum for compound **2** recorded in CDCl<sub>3</sub> at 600 MHz.

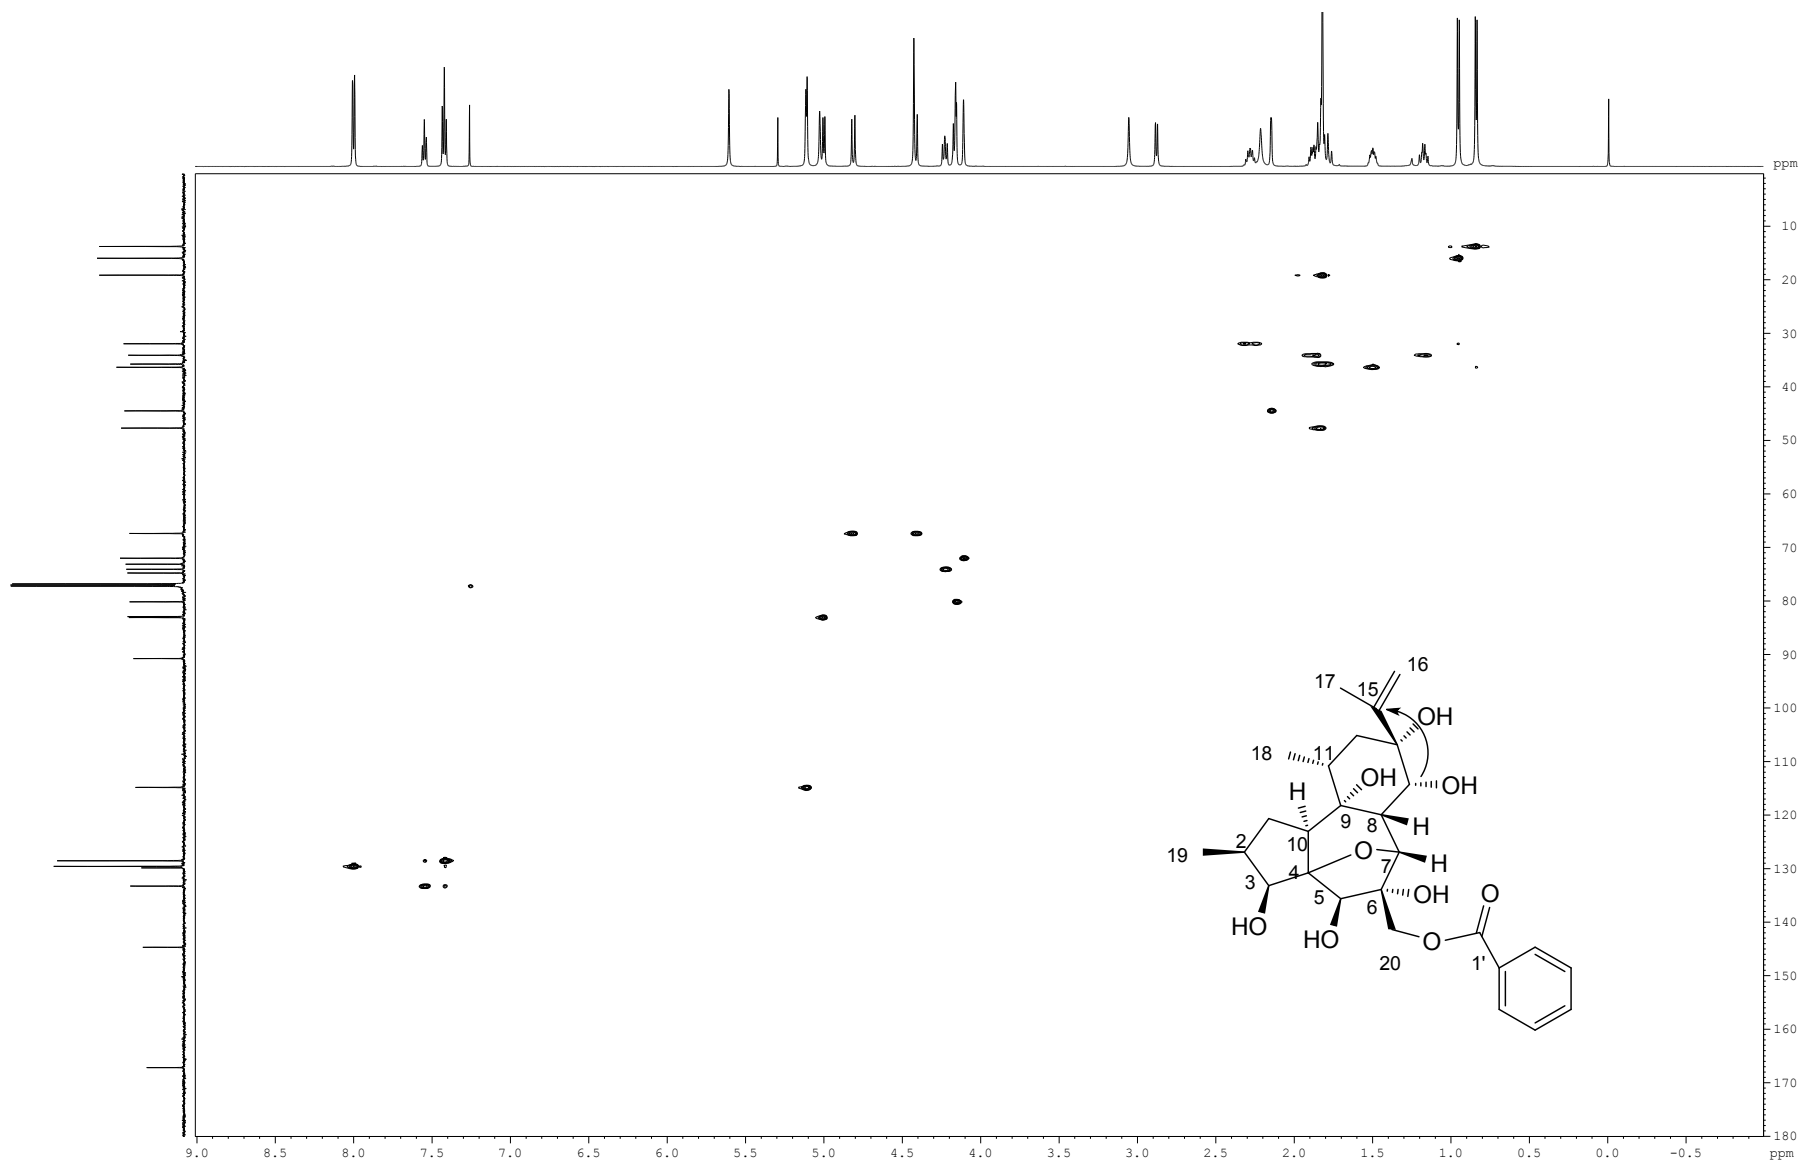

11:HMBC spectrum for compound **2** recorded in CDCl<sub>3</sub> at 600 MHz.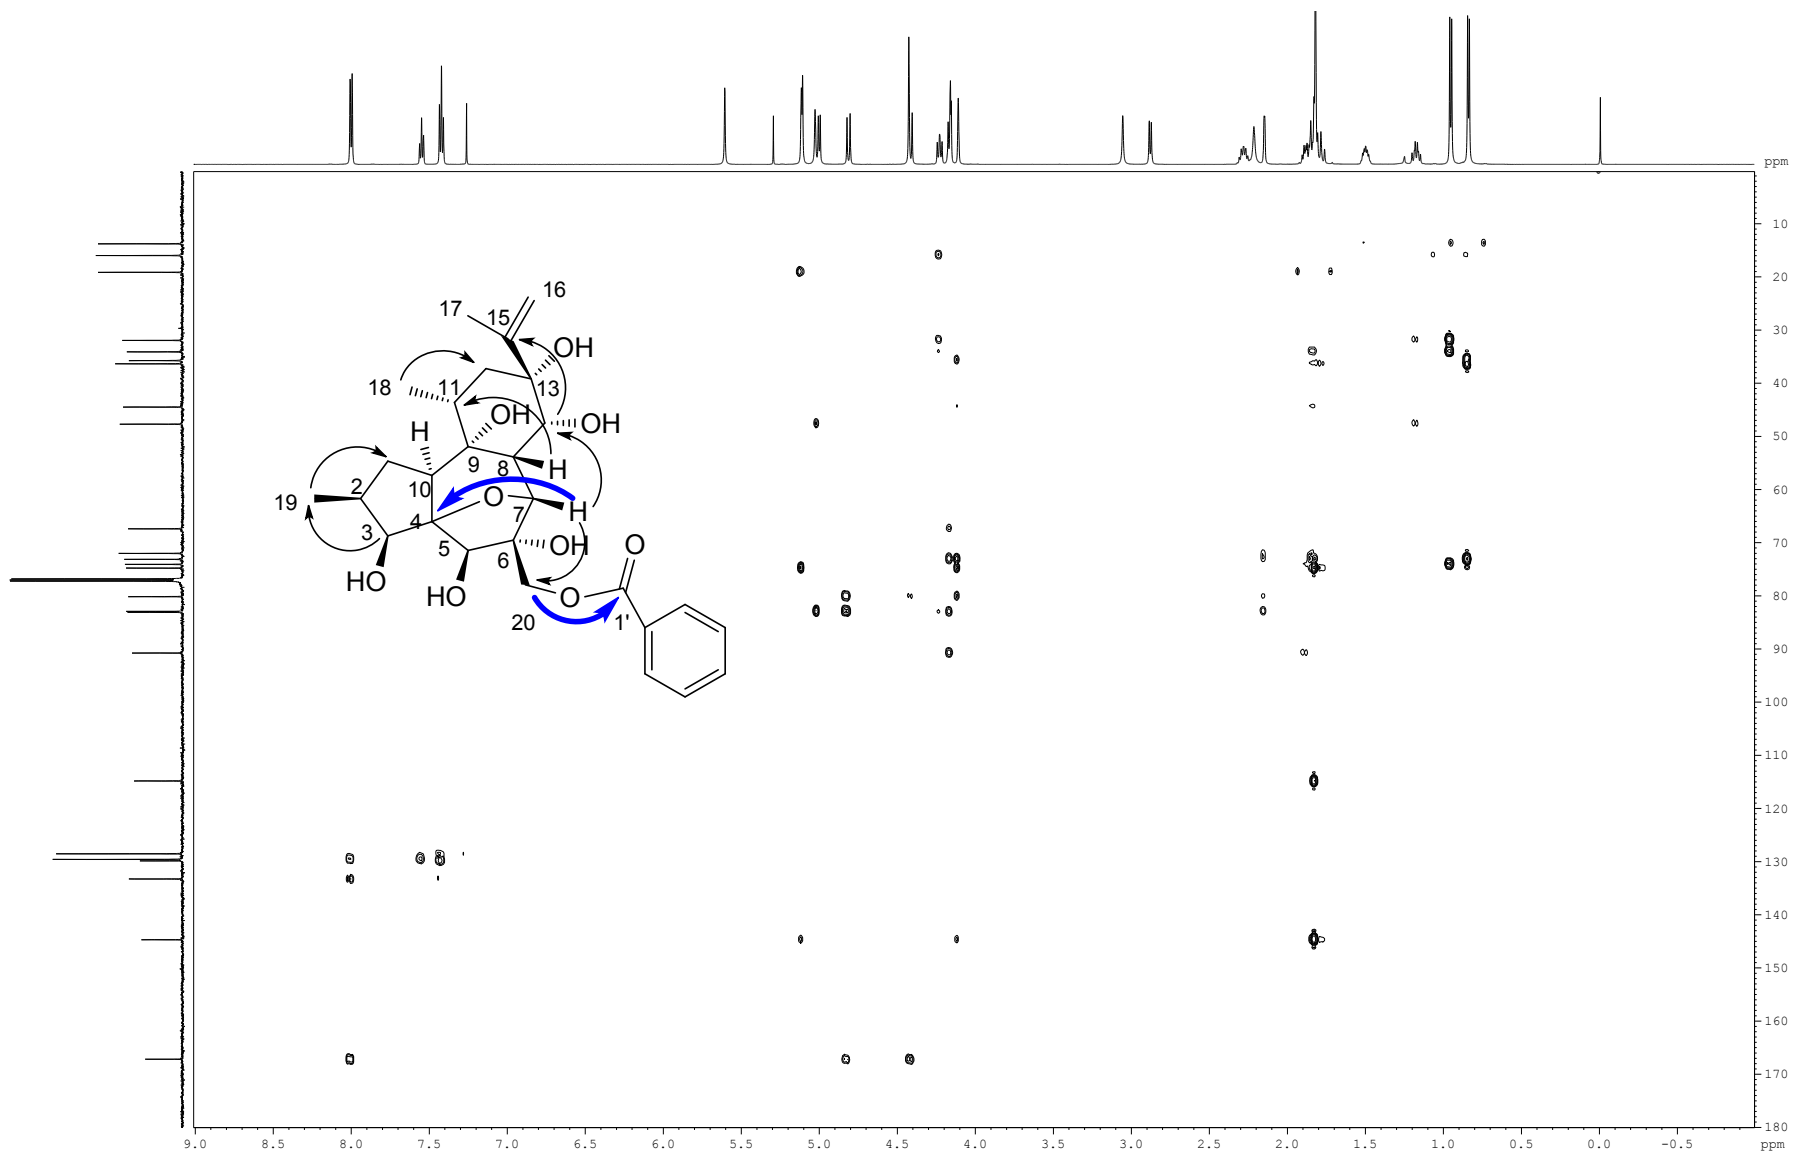

12:NOESY spectrum for compound **2** recorded in CDCl<sub>3</sub> at 600 MHz.

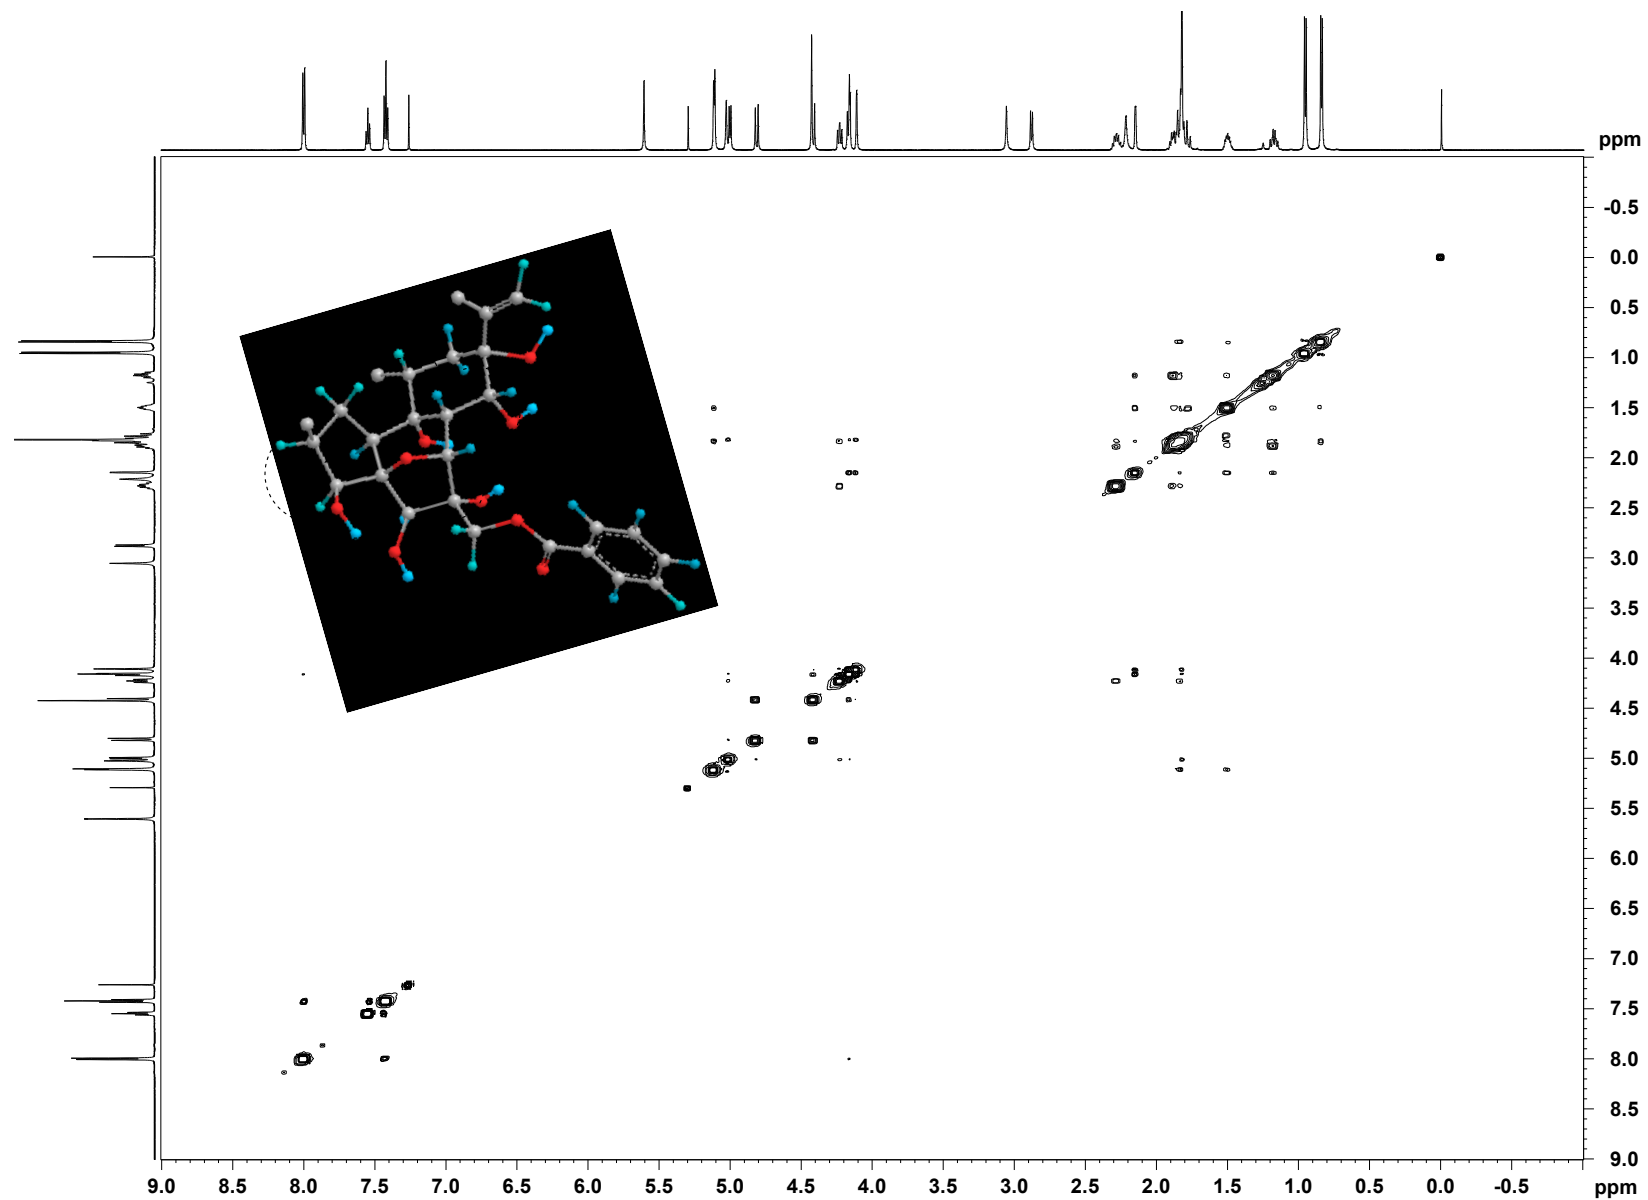

## 13. HRESIMS spectrum for compound 3 .

---

 Compound Mass Spectrum List Report
 

---

## Analysis Info

Analysis Name D:\data\songshaojiang\plotfiles\YH-38-4.d  
 Method tune\_low.m  
 Sample Name 3(c)-1.5h-MS  
 Comment

Acquisition Date 2009-7-7 18:08:40

Operator Bruker Customer  
 Instrument / Ser# microTOF-Q 125

## Acquisition Parameter

|             |          |                       |           |                  |           |
|-------------|----------|-----------------------|-----------|------------------|-----------|
| Source Type | ESI      | Ion Polarity          | Positive  | Set Nebulizer    | 0.4 Bar   |
| Focus       | Active   | Set Capillary         | 4500 V    | Set Dry Heater   | 190 度     |
| Scan Begin  | 100 m/z  | Set End Plate Offset  | -500 V    | Set Dry Gas      | 4.0 l/min |
| Scan End    | 1000 m/z | Set Collision Cell RF | 350.0 Vpp | Set Divert Valve | Source    |

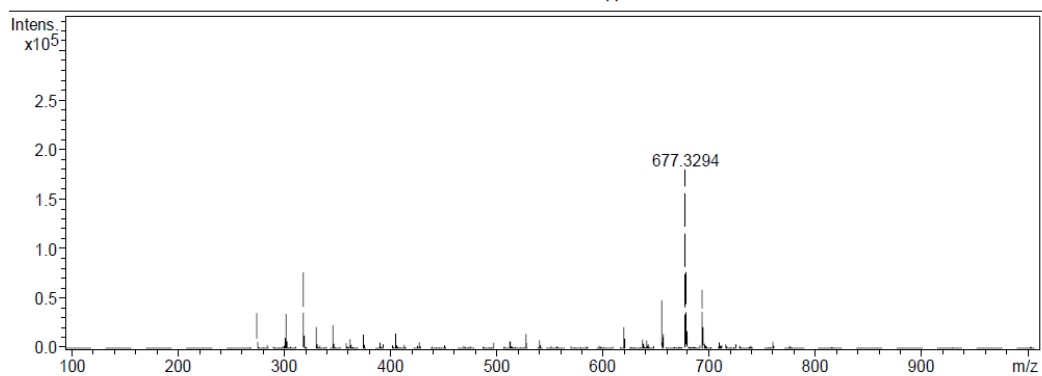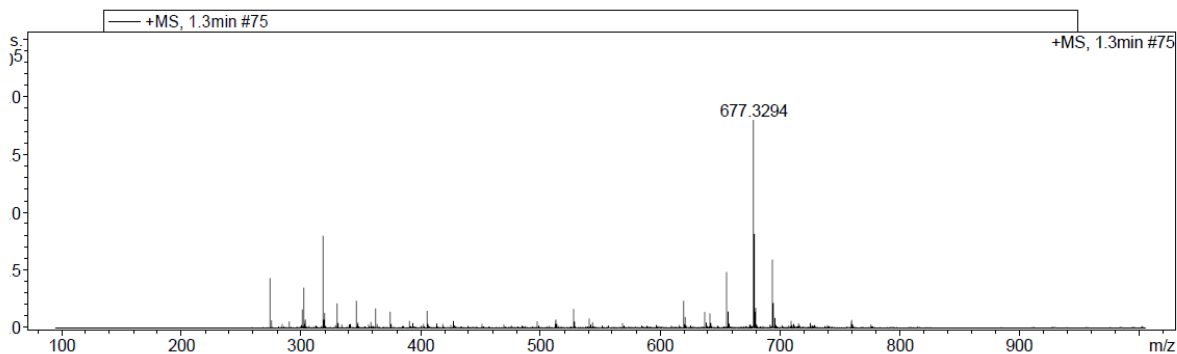

| # | m/z      | I      |
|---|----------|--------|
| 1 | 677.3294 | 179865 |

  

| Sum Formula                                                     | Sigma | m/z      | Err [ppm] | Mean Err [ppm] | Err [mDa] | rdb   | N Rule | e    |
|-----------------------------------------------------------------|-------|----------|-----------|----------------|-----------|-------|--------|------|
| C <sub>37</sub> H <sub>50</sub> Na <sub>1</sub> O <sub>10</sub> | 0.211 | 677.3296 | 0.33      | 0.33           | 0.22      | 12.50 | ok     | even |



14:  $^1\text{H}$  NMR spectrum for compound **3** recorded in  $\text{CDCl}_3$  at 125 MHz.

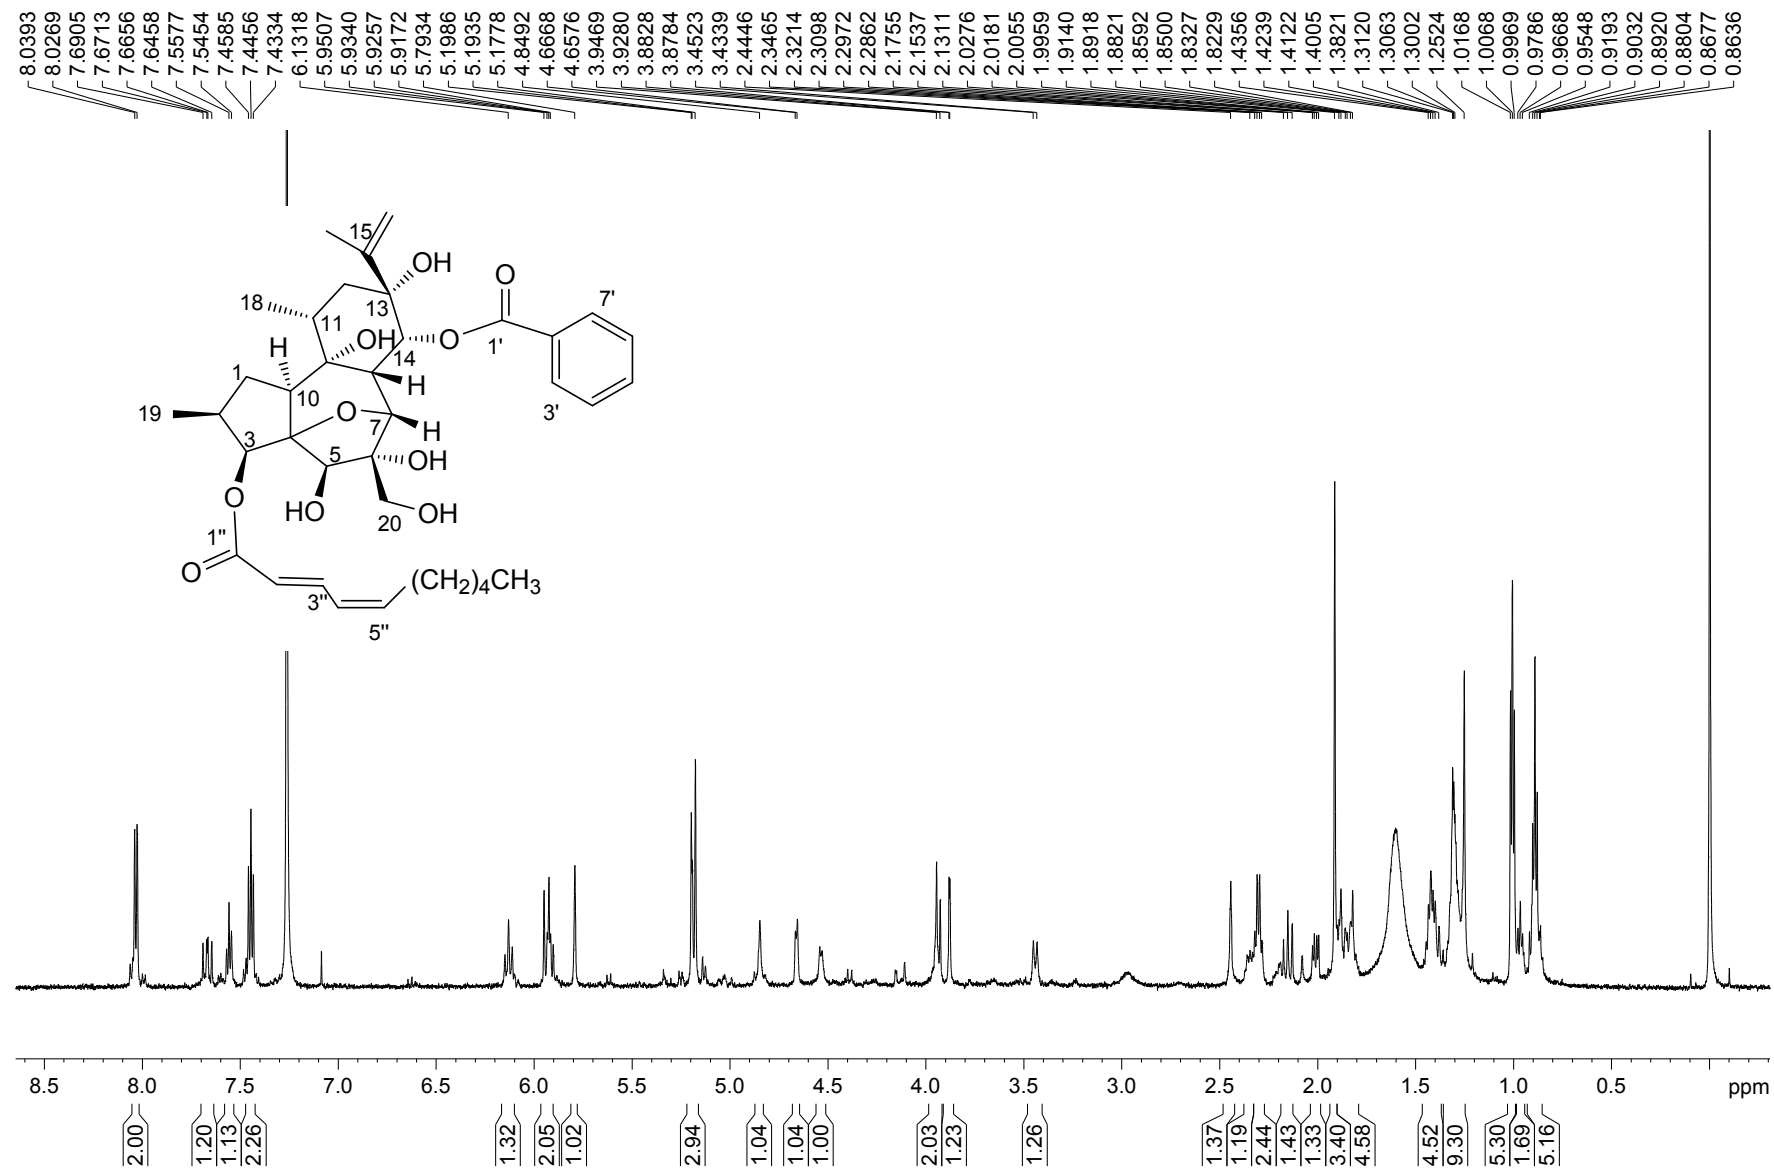

15:  $^{13}\text{C}$  NMR spectrum for compound 3 recorded in  $\text{CDCl}_3$  at 600 MHz.

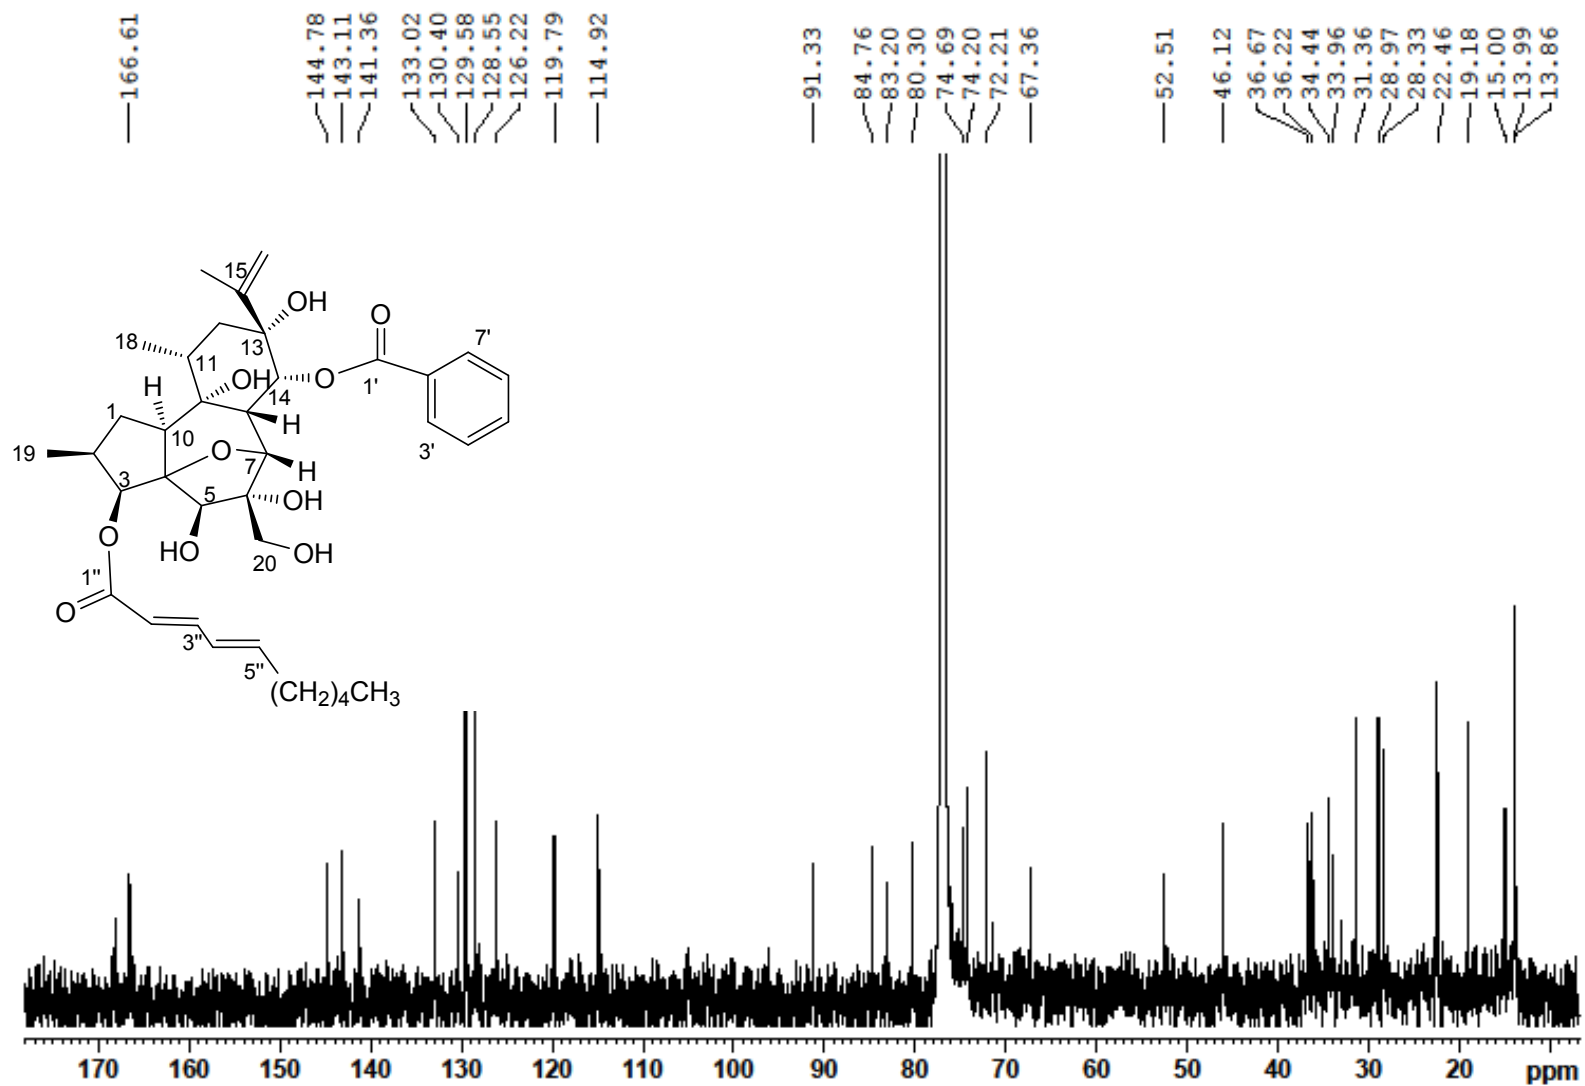

16:HMBC spectrum for compound 3 recorded in CDCl<sub>3</sub> at 600 MHz.

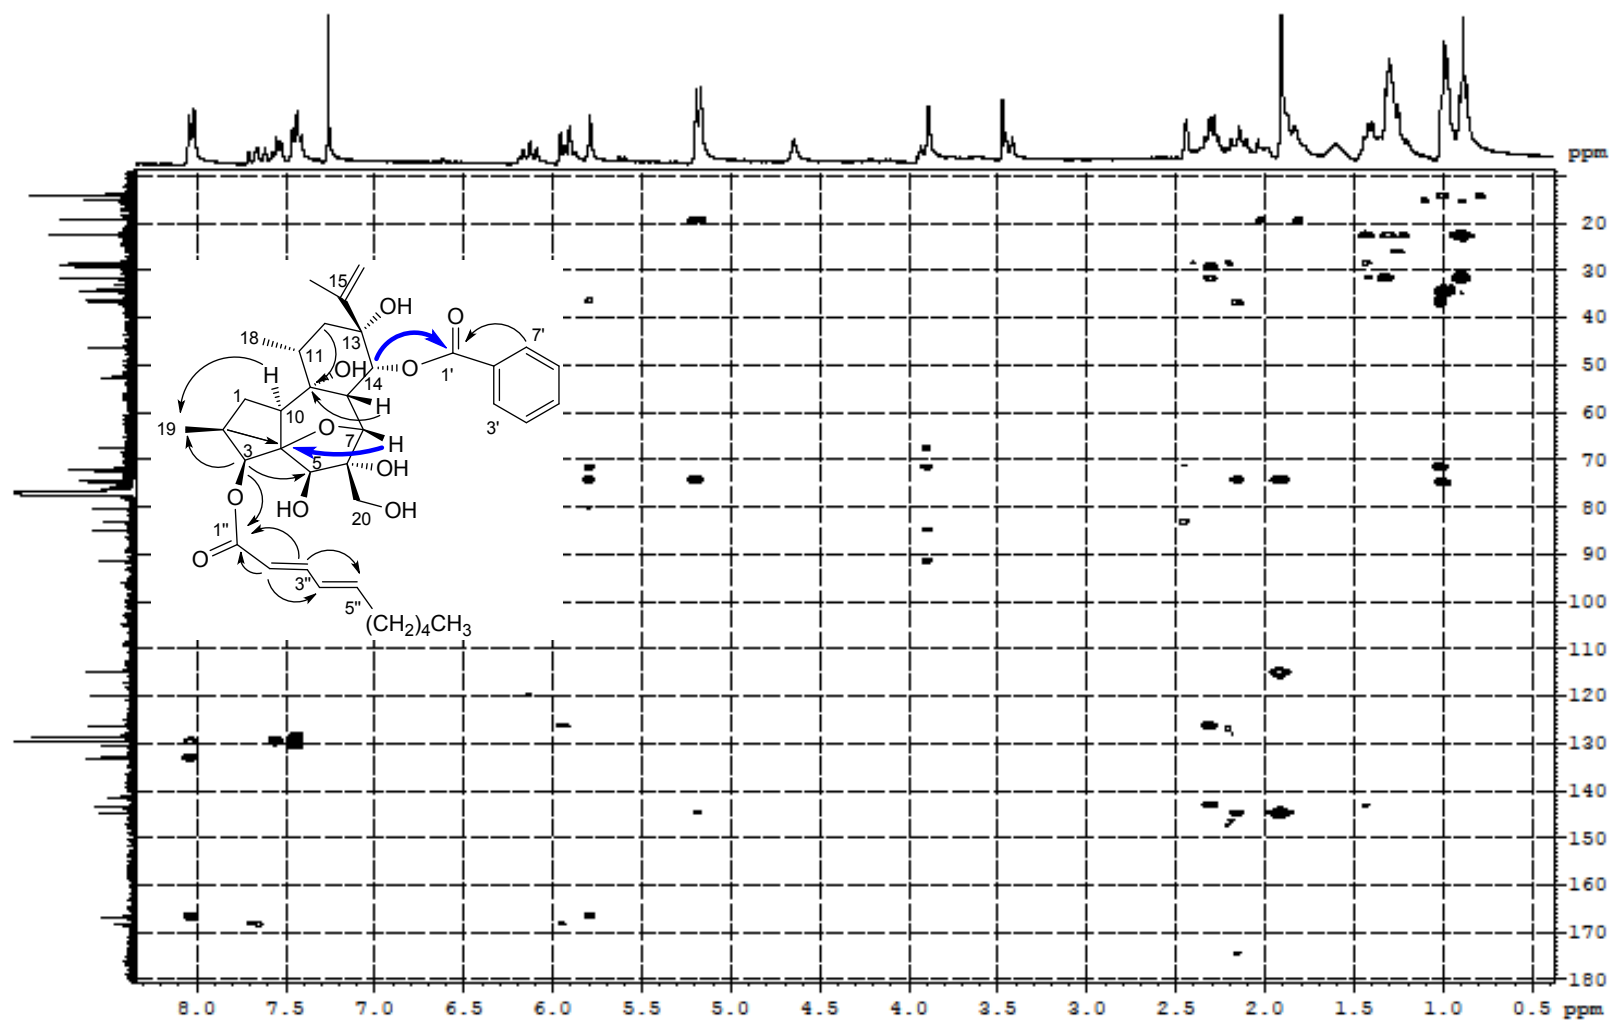

17:NOESY spectrum for compound **3** recorded in CDCl<sub>3</sub> at 600 MHz.

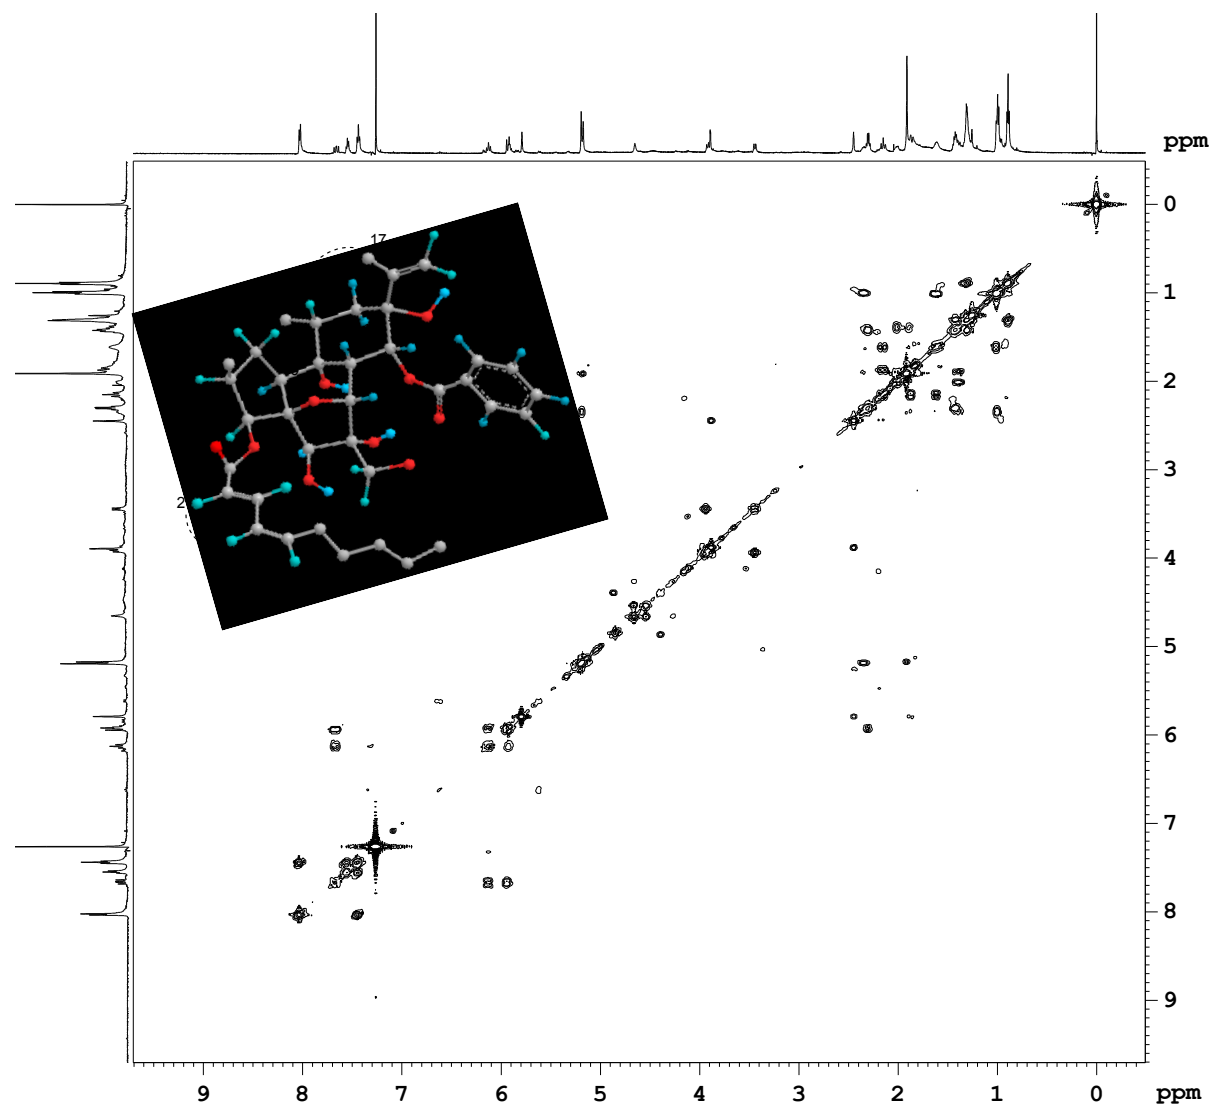

**18:H-HCOSY** spectrum for compound **3** recorded in CDCl<sub>3</sub> at 600 MHz.

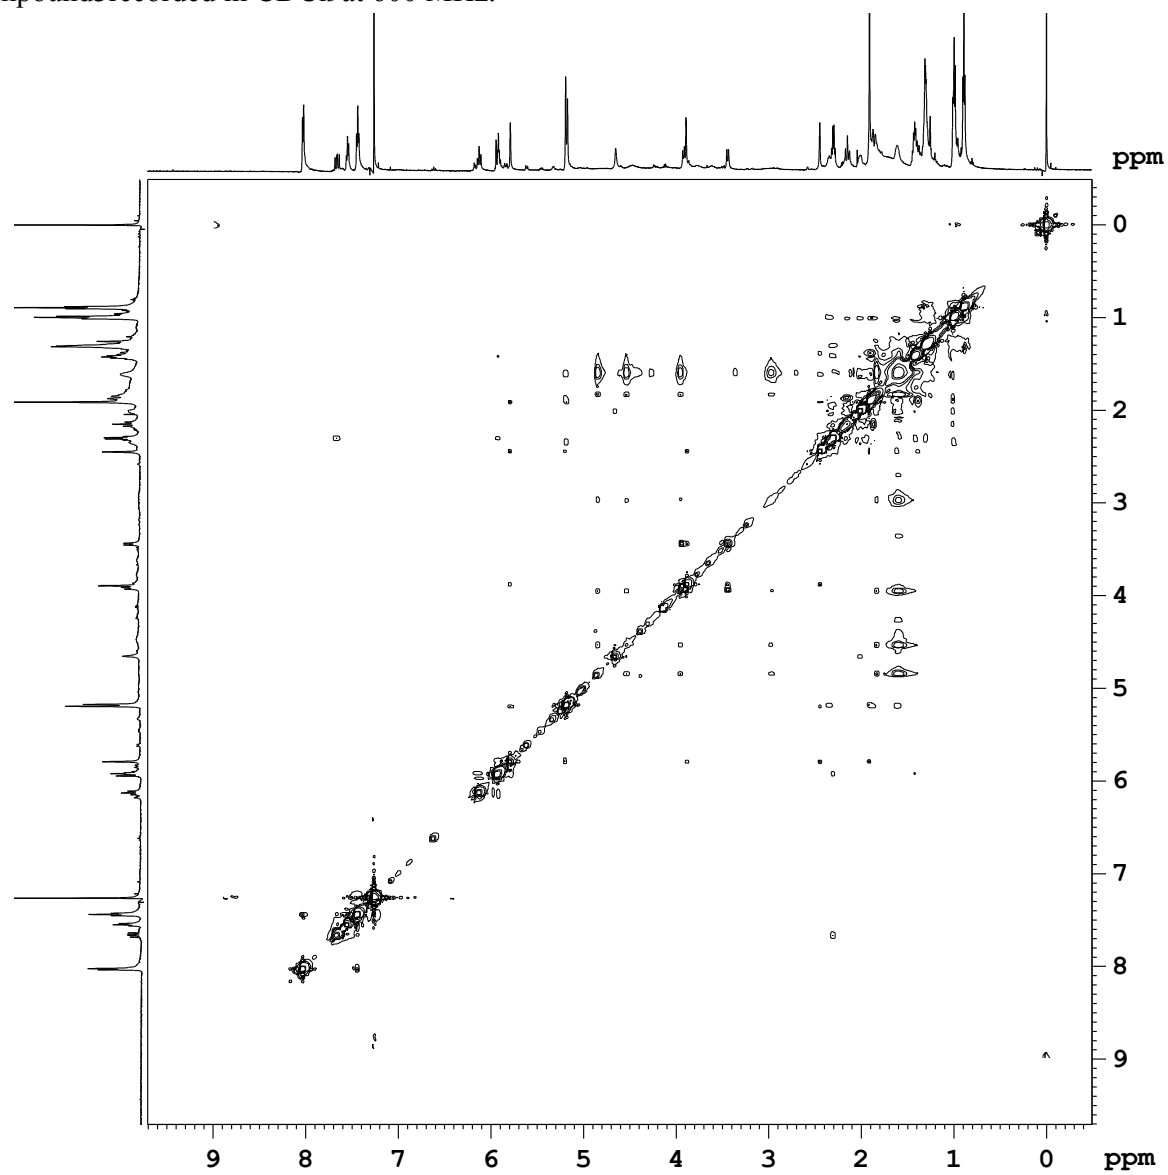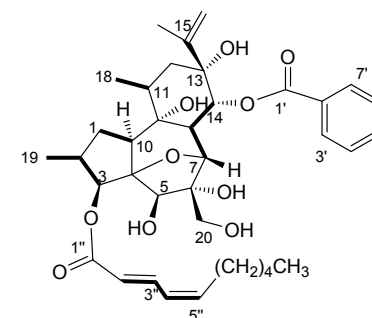

## 19. HRESIMS spectrum for compound 4 .

---

 Compound Mass Spectrum List Report
 

---

## Analysis Info

Analysis Name D:\data\songshaojiang\plotfiles\YH-38-4.d  
 Method tune\_low.m  
 Sample Name 3(c)-1.5h-MS  
 Comment

Acquisition Date 2009-7-7 18:08:40

Operator Bruker Customer  
 Instrument / Ser# micrOTOF-Q 125

## Acquisition Parameter

| Source Type | ESI      | Ion Polarity          | Positive  | Set Nebulizer    | 0.4 Bar   |
|-------------|----------|-----------------------|-----------|------------------|-----------|
| Focus       | Active   | Set Capillary         | 4500 V    | Set Dry Heater   | 190 °C    |
| Scan Begin  | 100 m/z  | Set End Plate Offset  | -500 V    | Set Dry Gas      | 4.0 l/min |
| Scan End    | 1000 m/z | Set Collision Cell RF | 350.0 Vpp | Set Divert Valve | Source    |

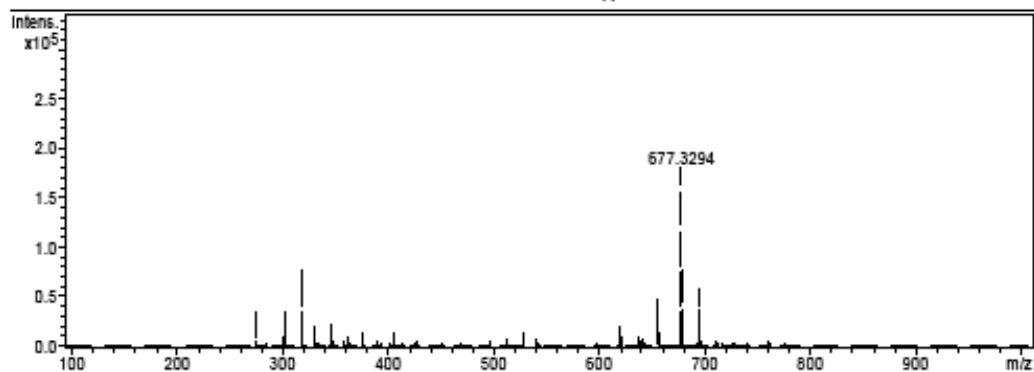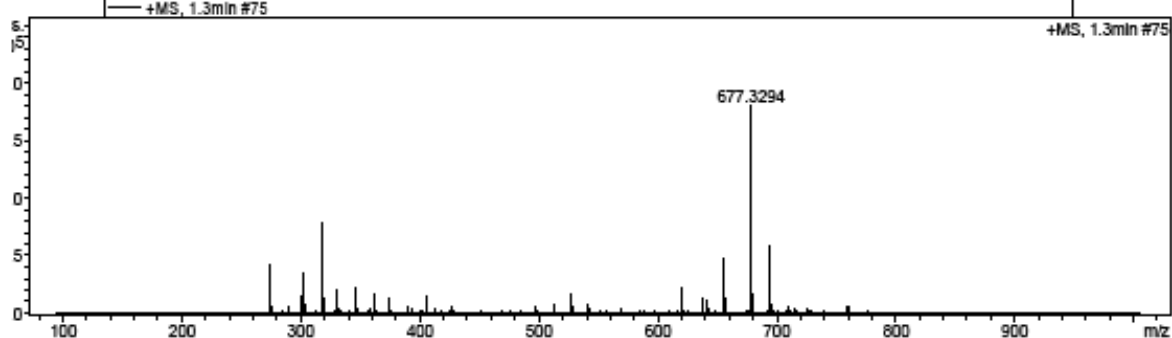

| # | m/z      | I      |
|---|----------|--------|
| 1 | 677.3294 | 179665 |

  

| Sum  | Formula | Sigma | m/z  | Err [ppm] | Mean Err [ppm] | Err [mDa] | rdb  | N Rule | e     |    |      |
|------|---------|-------|------|-----------|----------------|-----------|------|--------|-------|----|------|
| C 37 | H 50    | Na 1  | O 10 | 0.211     | 677.3296       | 0.33      | 0.33 | 0.22   | 12.50 | ok | even |

20.  $^1\text{H}$  NMR spectrum for compound **4** recorded in  $\text{CDCl}_3$  at 600 MHz.

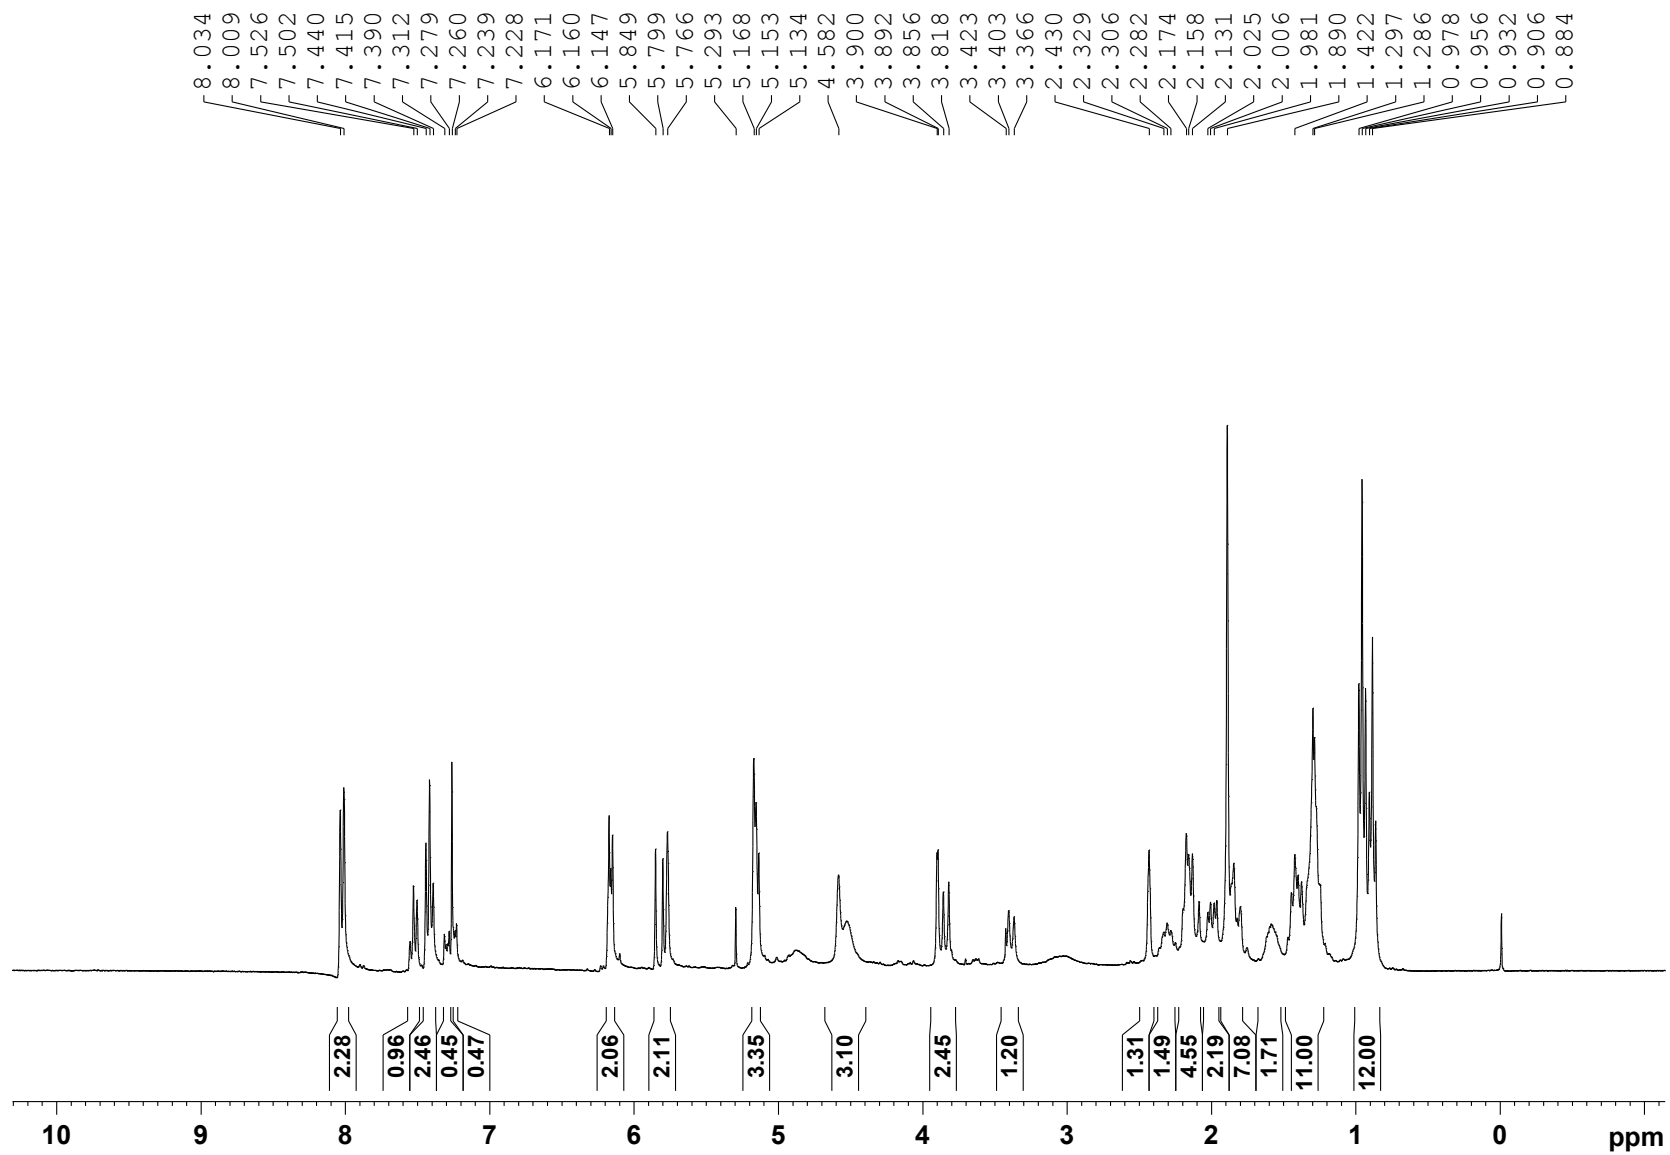

**21.**  $^{13}\text{C}$  NMR spectrum for compound **4** recorded in  $\text{CDCl}_3$  at 125 MHz.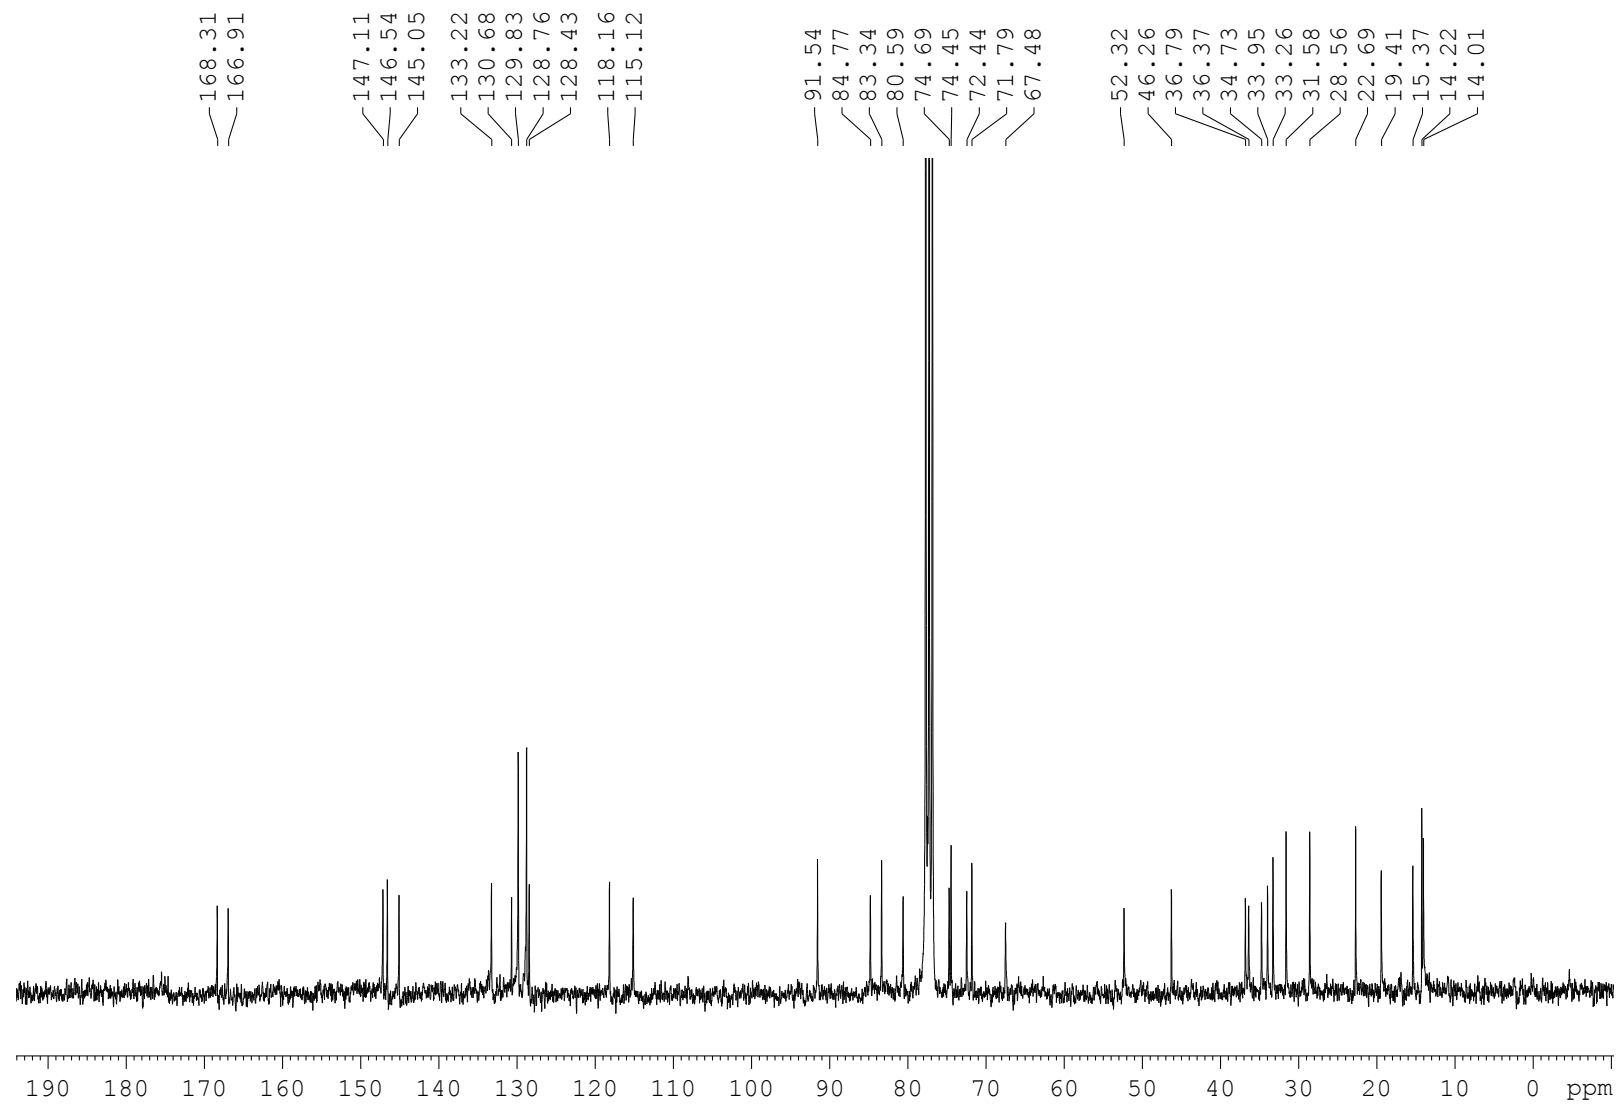



22. HMBC spectrum for compound 4 recorded in CDCl<sub>3</sub> at 600 MHz.

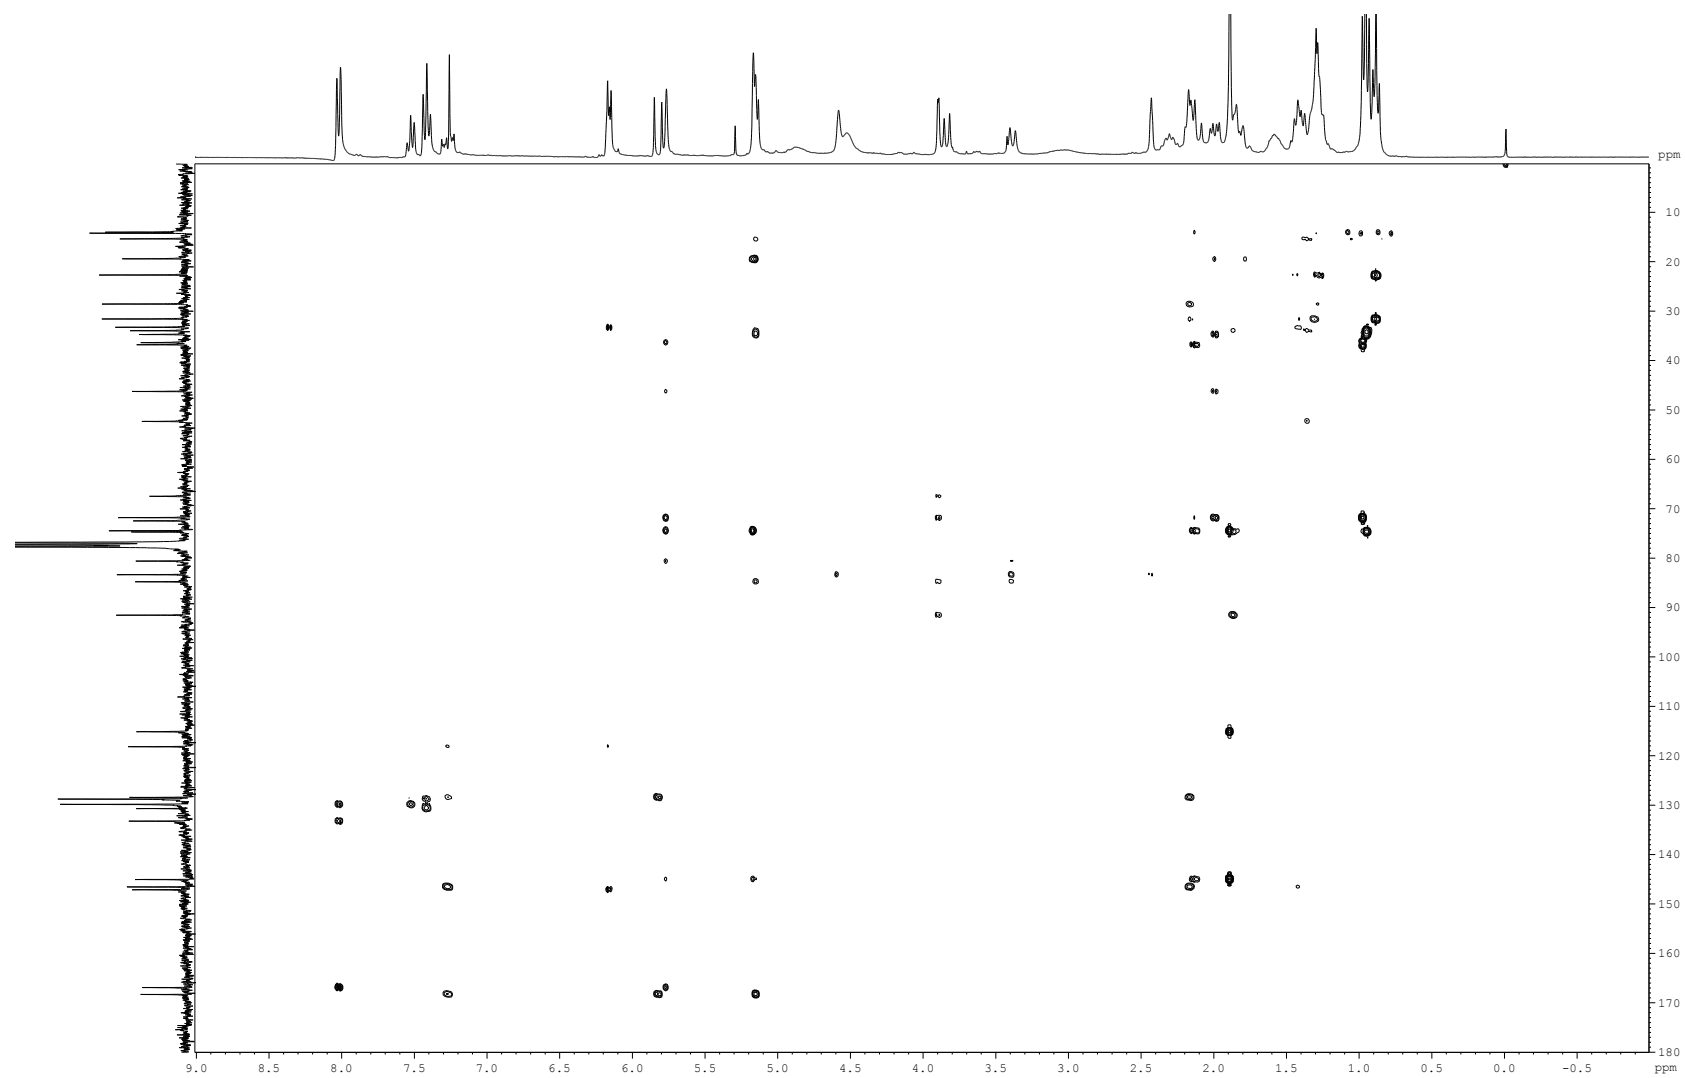

23. HRESIMS spectrum for compound 5.

S 23

Compound Mass Spectrum List Report

**Analysis Info**  
 Analysis Name D:\data\songsong\jiang\plotfiles\YH-39-2.d  
 Acquisition Date 2009-7-7 18:05:50  
 Method tune\_low.m  
 Operator Bruker Customer  
 Sample Name 3(c)-1.5h-MS  
 Instrument / Ser# micrOTOF-Q 125  
 Comment

**Acquisition Parameter**  
 Source Type ESI  
 Focus Adve  
 Scan Range 1000 m/z  
 Ion Polarity Positive  
 Set Capillary Voltage 400 V  
 Set Offset 400.0 Vpp  
 Set Nebulizer 0.4 Bar  
 Set Dry Puffer 10 l/min  
 Set Diverter Valve Source

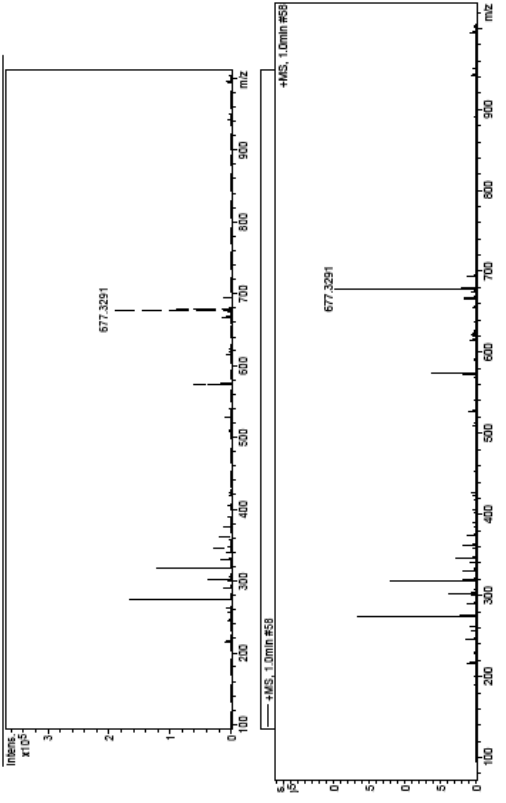

| # | m/z      | I      |
|---|----------|--------|
| 1 | 677.3291 | 197602 |

Sum Formula C<sub>37</sub>H<sub>50</sub>Na<sub>11</sub>O<sub>10</sub>    Sigma 0.211    m/z 677.3296    Mean Err (ppm) 0.40    Err (mDa) 0.28    rdb 12.50    N Rule 6  
 ok even

24.  $^1\text{H}$  NMR spectrum for compound **5** recorded in  $\text{CDCl}_3$  at 600 MHz.

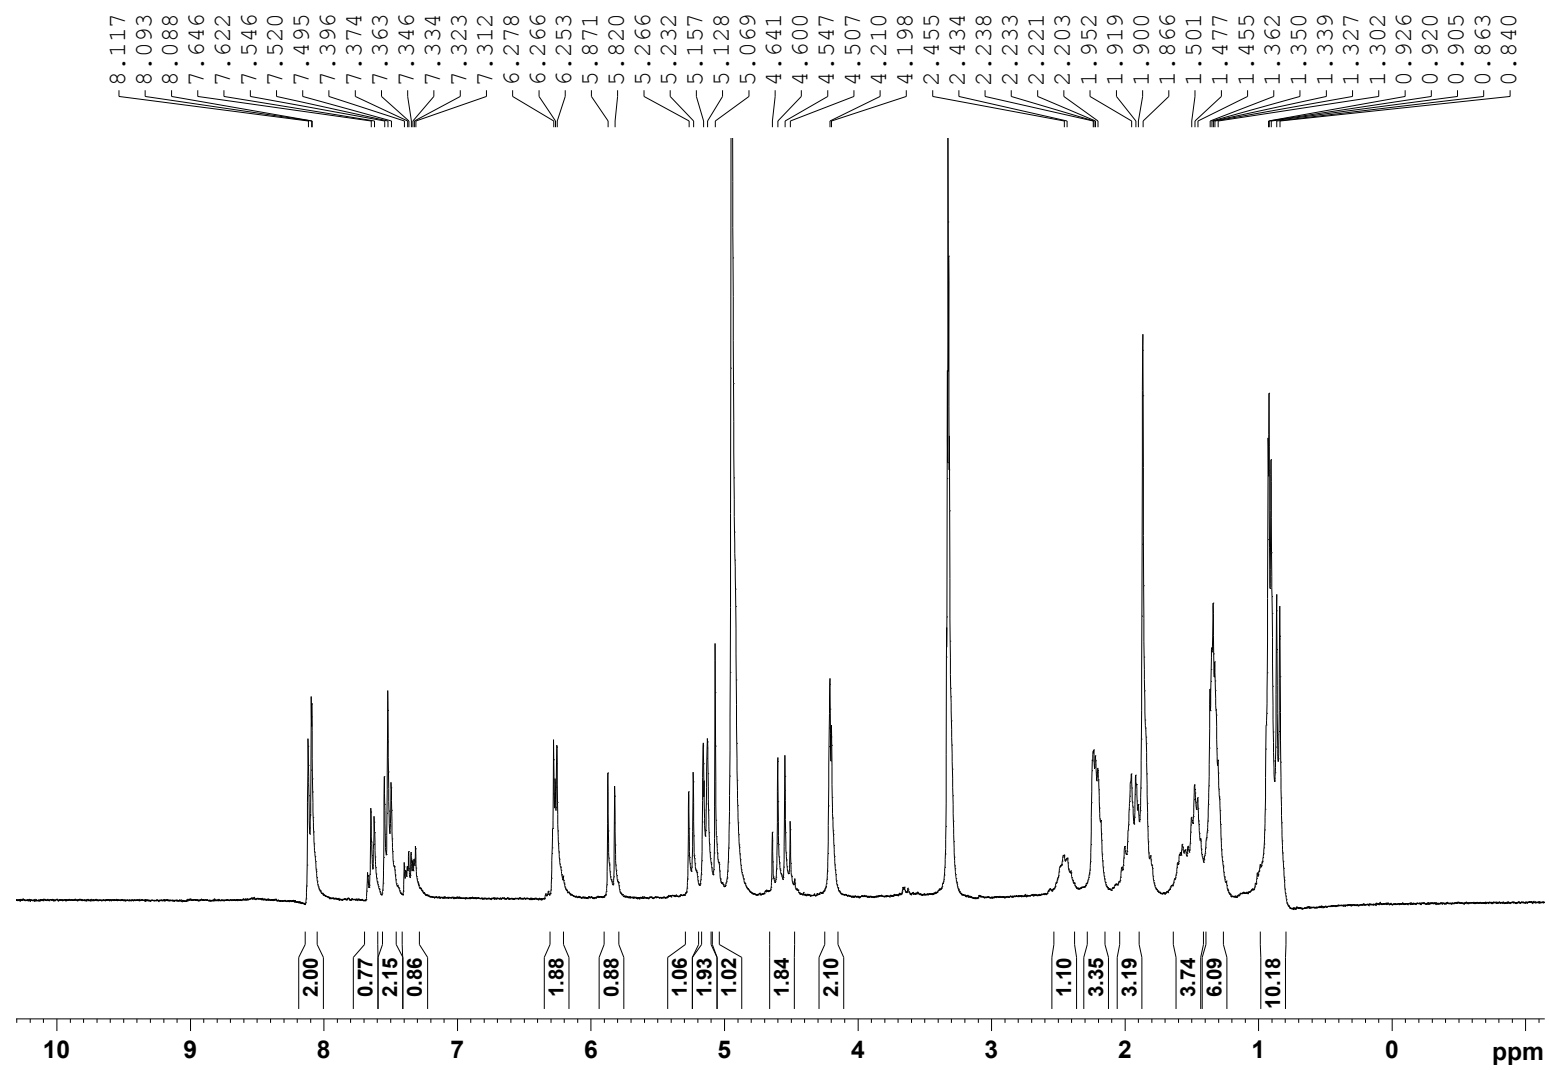

**25.**  $^{13}\text{C}$  NMR spectrum for compound **5** recorded in  $\text{CDCl}_3$  at 125 MHz.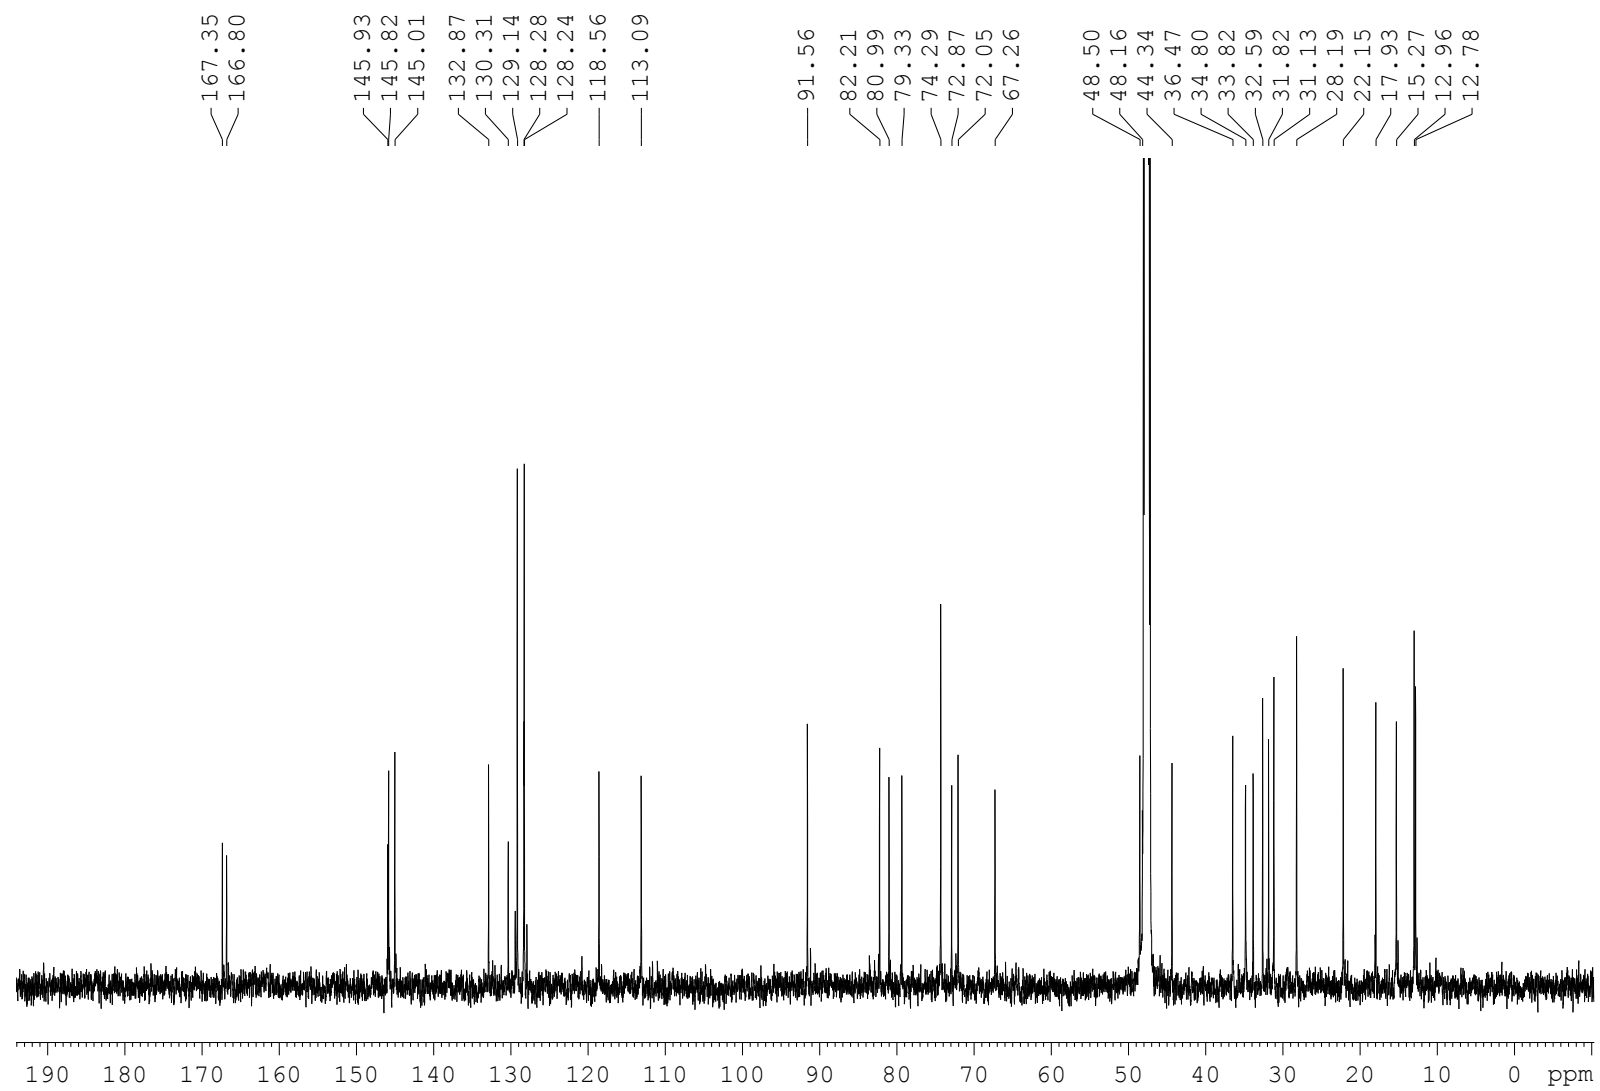

26. HMBC spectrum for compound 5 recorded in CDCl<sub>3</sub> at 600 MHz.

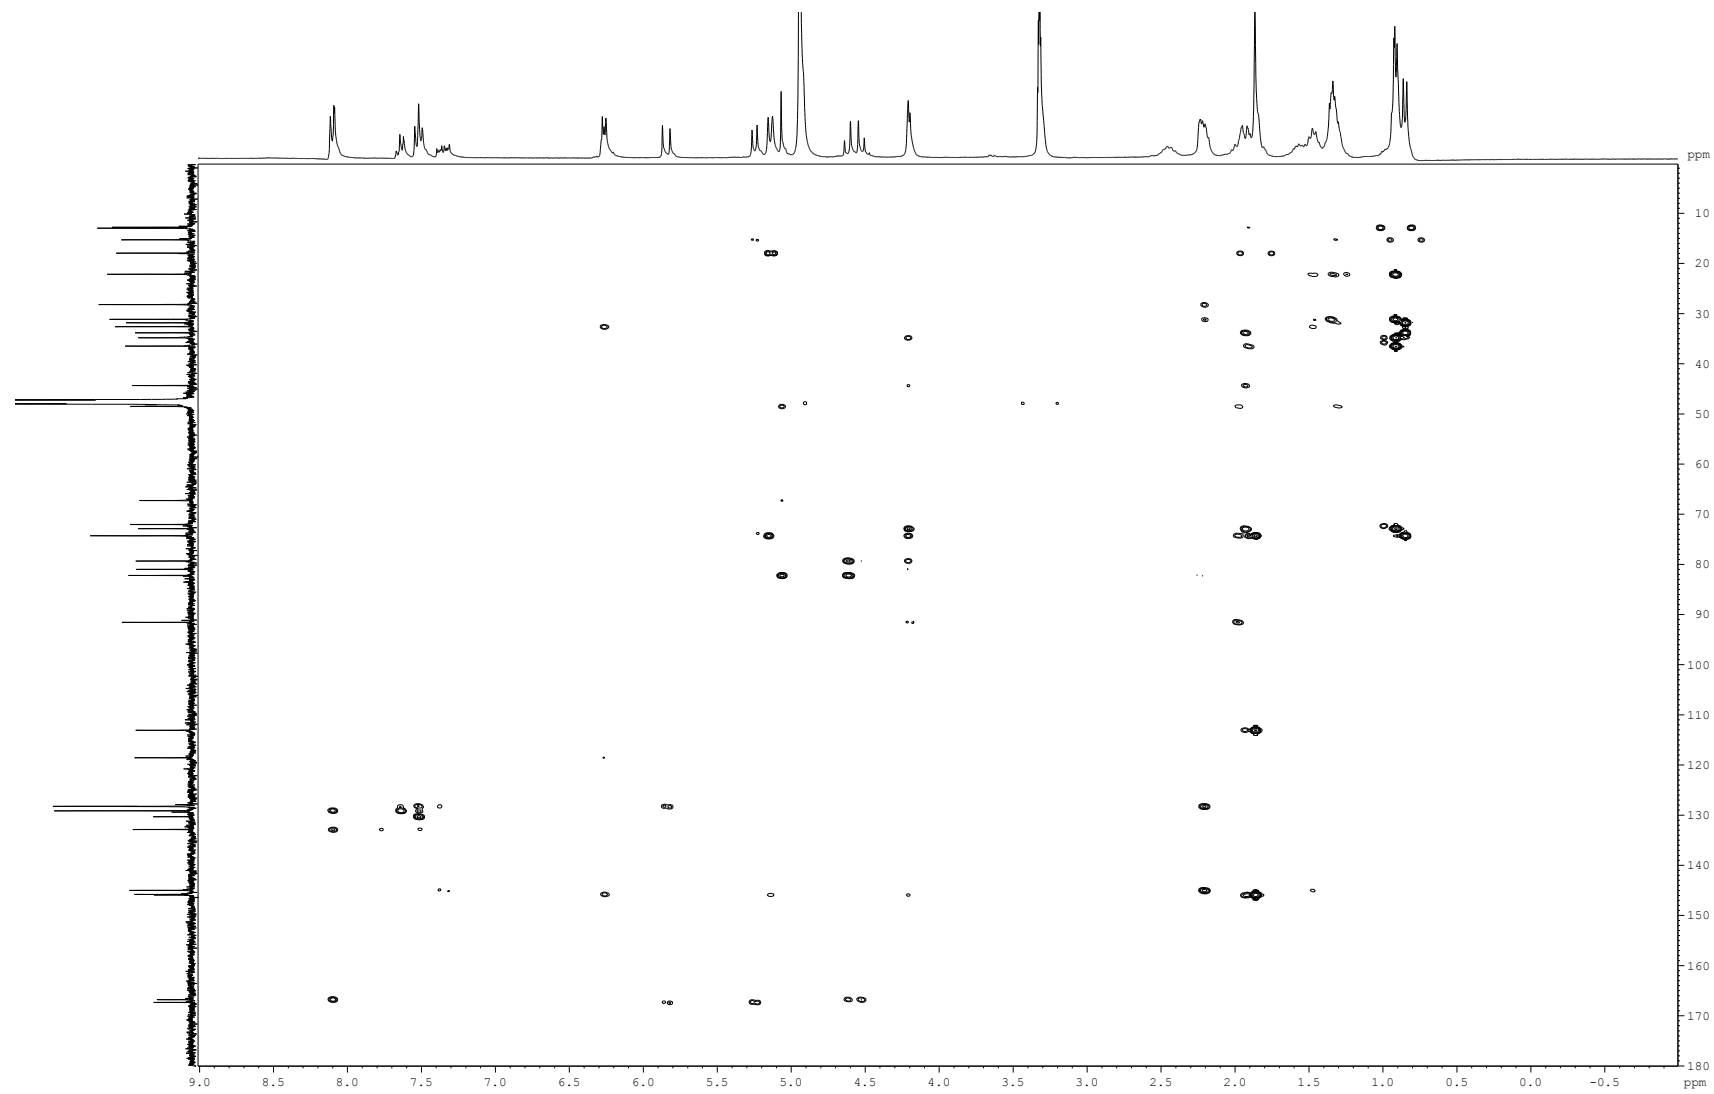

27. HRESIMS spectrum for compound6.

Compound Mass Spectrum List Report

Analysis Info

Analysis Name D:\data\isongshaojiang\pilotfiles\YH-38-1.d  
 Method tune\_low.m  
 Sample Name 3(c)-1.5h-MS  
 Comment

Acquisition Date 2009-7-7 18:03:34

Operator Bruker Customer  
 Instrument / Ser# micrOTOF-Q 125

Acquisition Parameter

Source Type ESI  
 Focus Active  
 Scan Begin 100 m/z  
 Scan End 1000 m/z

Ion Polarity Positive  
 Set Capillary 4500 V  
 Set End Plate Offset -500 V  
 Set Collision Cell RF 250.0 Vpp

Set Nebulizer 0.4 Bar  
 Set Dry Heater 190 °C  
 Set Dry Gas 4.0 l/min  
 Set Divert Valve Source

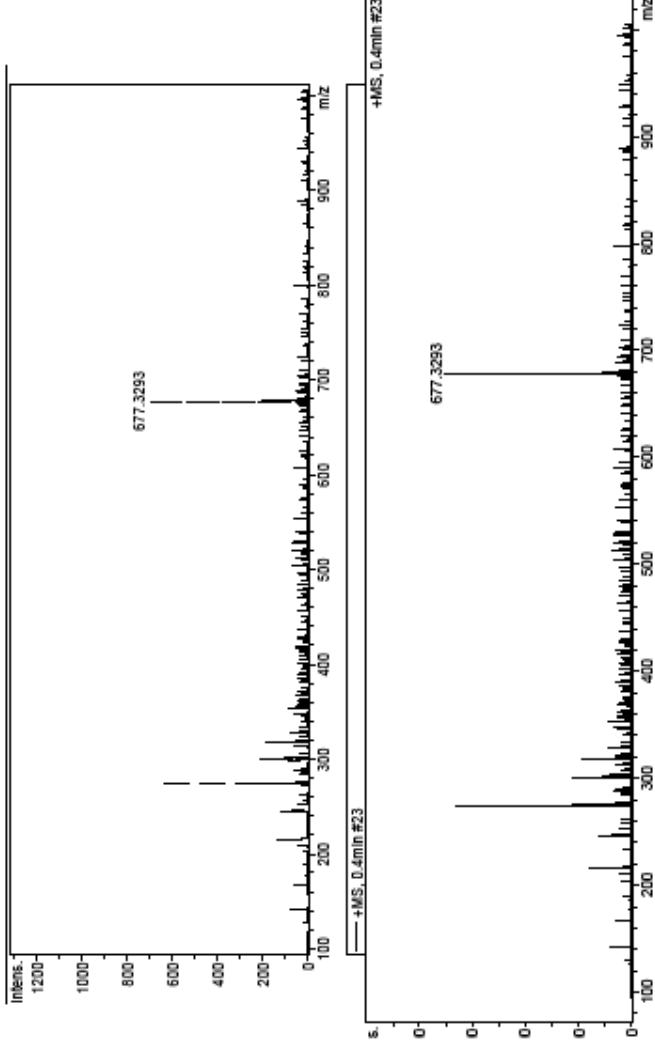

| # | m/z      | I      |
|---|----------|--------|
| 1 | 677.3306 | 155671 |

| # | m/z | I |
|---|-----|---|
|---|-----|---|

| # | m/z      | I   |
|---|----------|-----|
| 1 | 677.3293 | 704 |

| Summ Formula        | Sigma | m/z      | Err (ppm) | Mean Err (ppm) | Err (mDa) | rbt   | N  | Rule | e |
|---------------------|-------|----------|-----------|----------------|-----------|-------|----|------|---|
| C 37 H 50 Na 1 O 10 | 0.211 | 677.3296 | 0.41      | 0.40           | 0.28      | 12.50 | ok | even |   |

28.  $^1\text{H}$  NMR spectrum for compound **6** recorded in  $\text{CDCl}_3$  at 600 MHz.

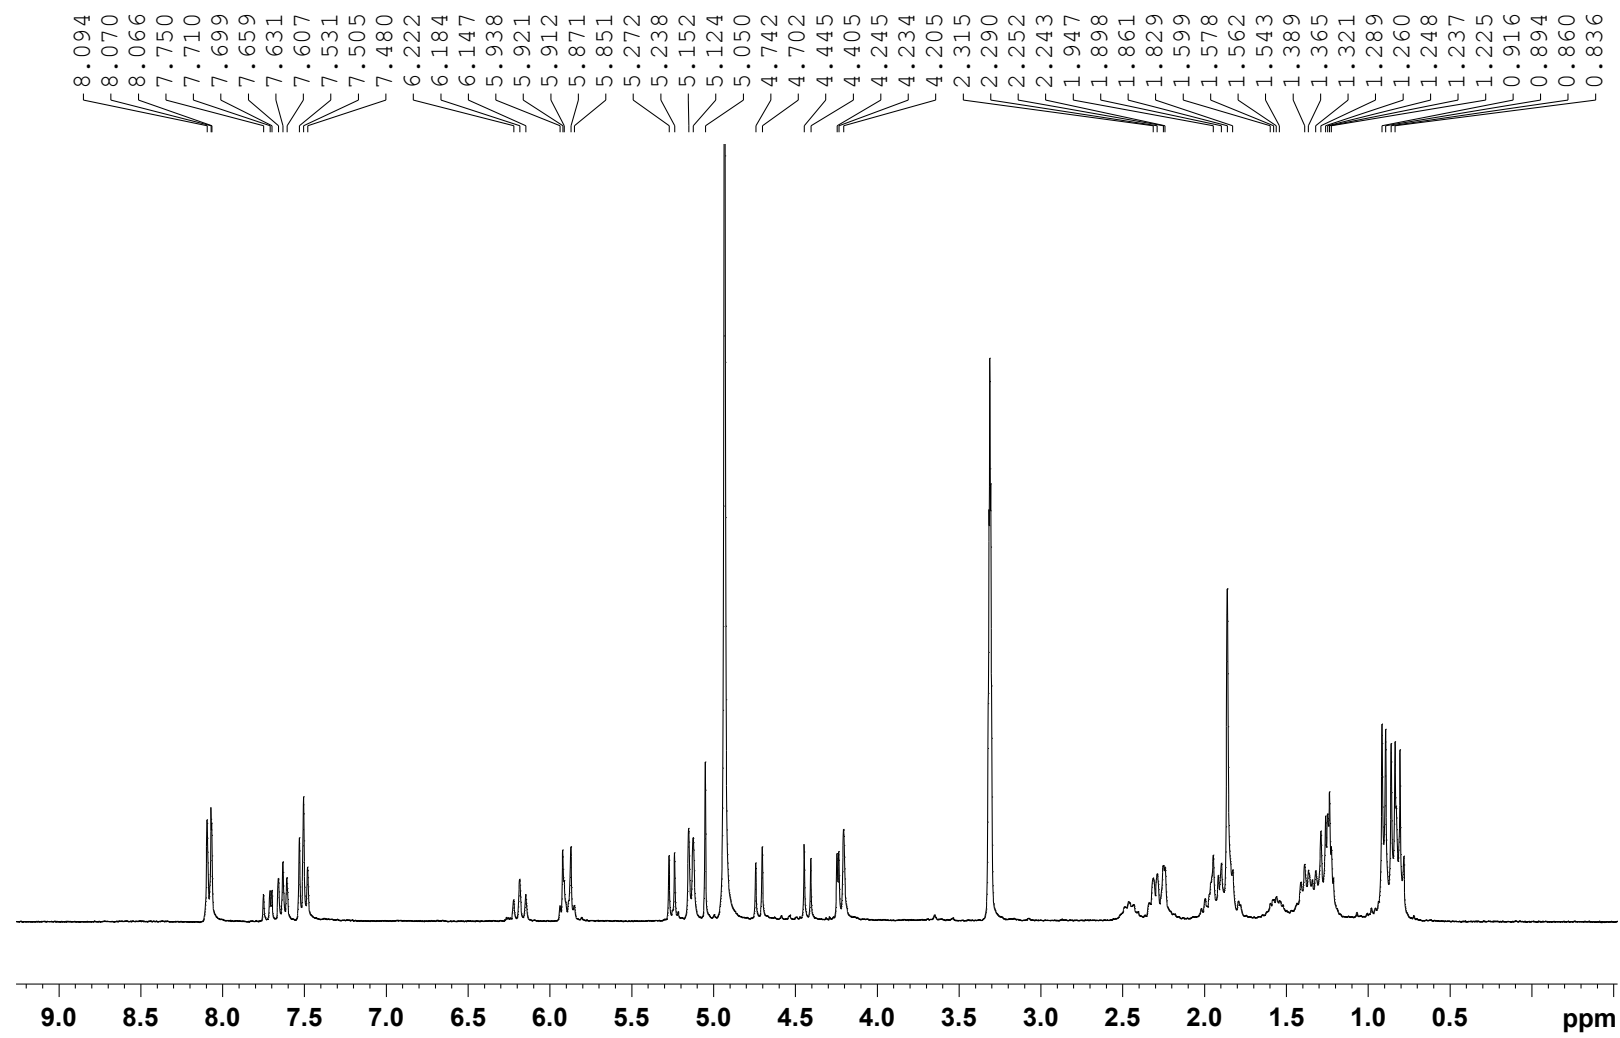

29.  $^{13}\text{C}$  NMR spectrum for compound **6** recorded in  $\text{CDCl}_3$  at 125 MHz.

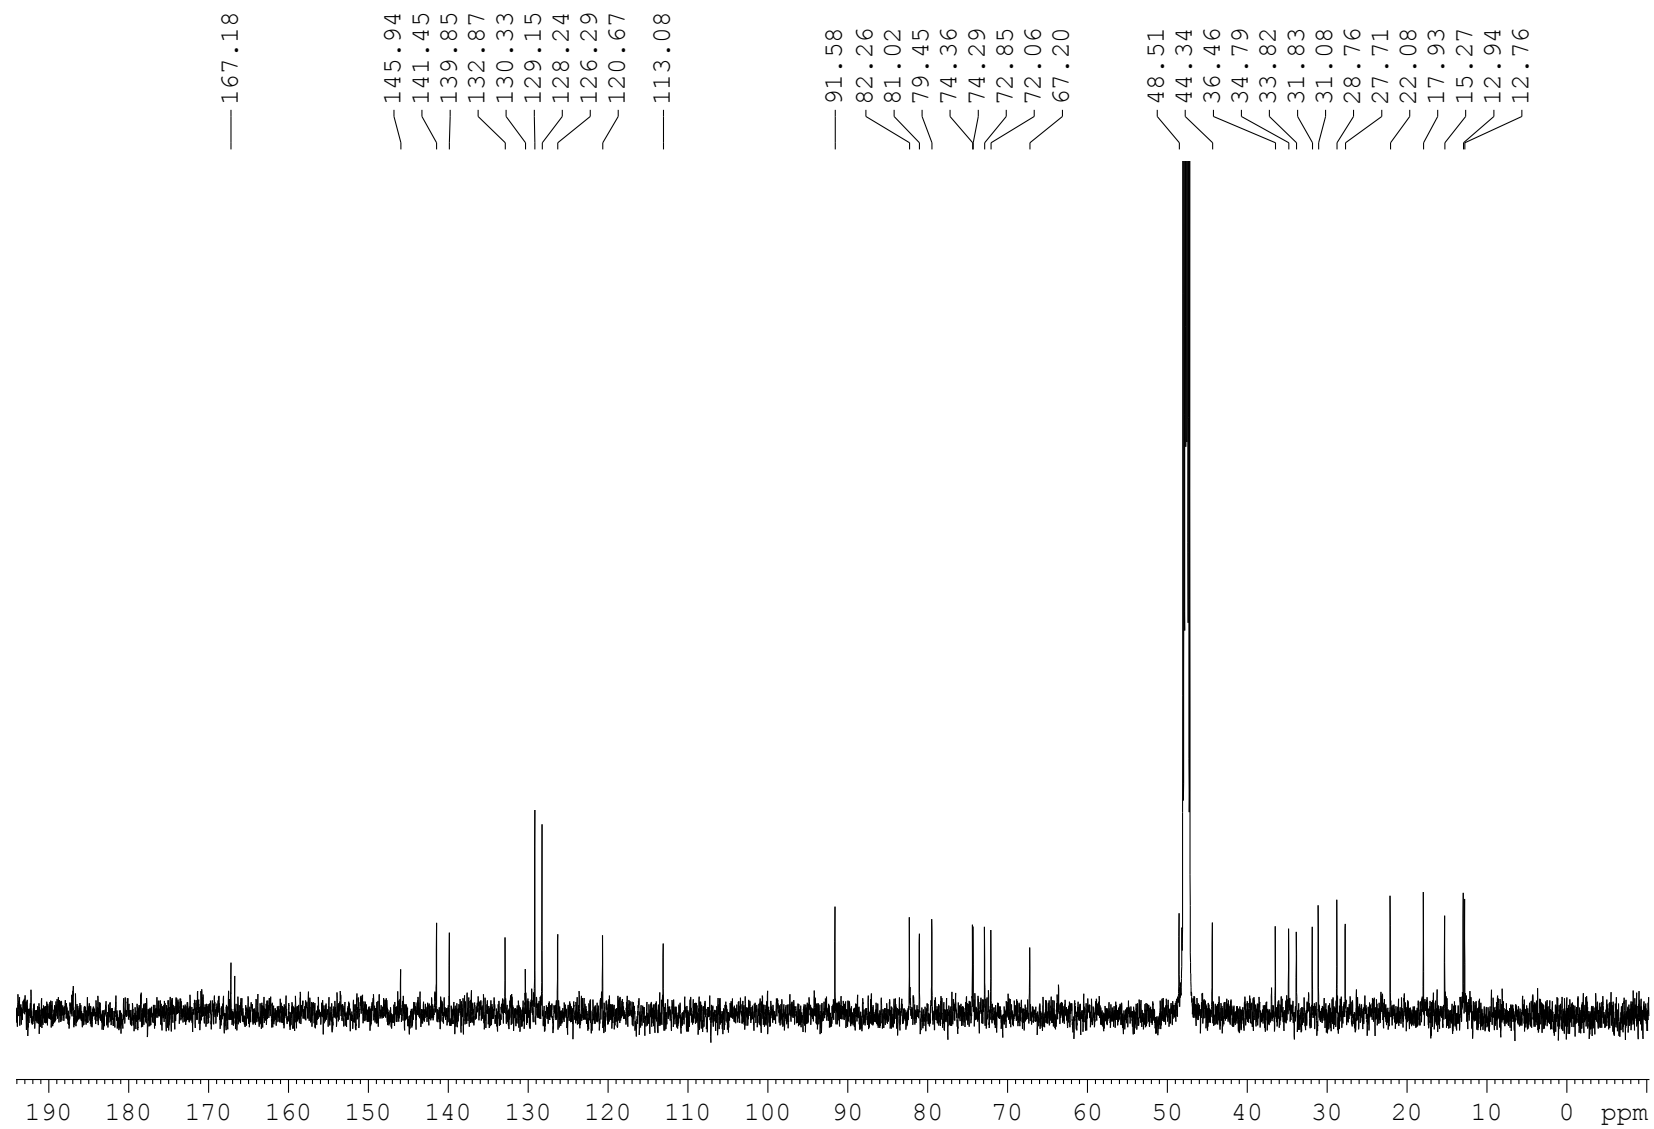



30. HMBC spectrum for compound 6 recorded in CDCl<sub>3</sub> at 600 MHz.

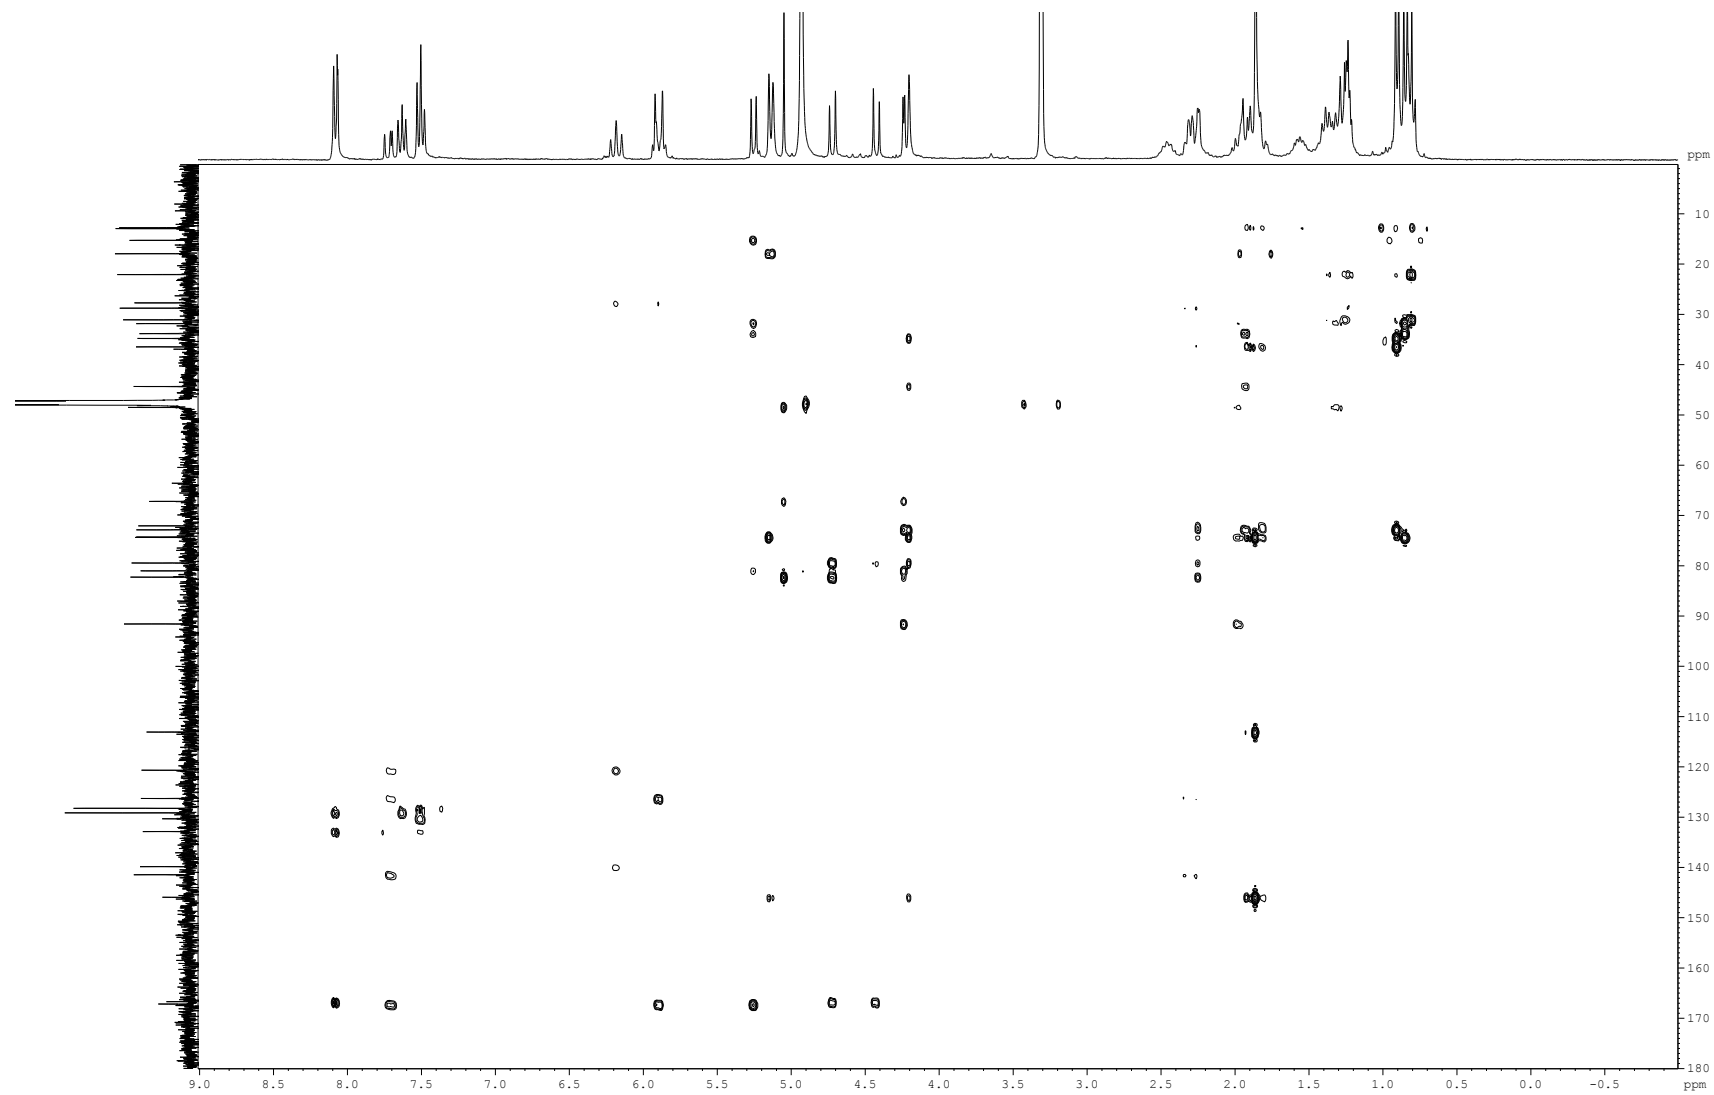

31. HRESIMS spectrum for compound7.

S 31

### Mass Spectrum Molecular Formula Report

**Analysis Info**  
 Acquisition Date 3/23/2012 2:58:30 PM  
 Analysis Name D:\Data\20120323\YHL-3-1.d  
 Method LIU 250-550POS.m  
 Sample Name YHL-3-1  
 Comment  
 Operator Bruker Customer  
 Instrument / Ser# micrOTOF-Q 125

**Acquisition Parameter**  
 Source Type ESI  
 Focus Not active  
 Scan Begin 50 m/z  
 Scan End 3000 m/z  
 Ion Polarity Positive  
 Set Capillary 4500 V  
 Set End Plate Offset -500 V  
 Set Collision Cell RF 450.0 Vpp  
 Set Nebulizer 0.3 Bar  
 Set Dry Heater 180 °C  
 Set Dry Gas 4.0 l/min  
 Set Divert Valve Source

**Generate Molecular Formula Parameter**

Formula, min. C<sub>34</sub>H<sub>40</sub>O<sub>10</sub>Na  
 Formula, max.  
 Measured m/z 631.251  
 Check Valence no  
 Nitrogen Rule yes  
 Filter H/C Ratio no  
 Estimate Carbon yes  
 Tolerance 5 ppm  
 Minimum 0 ppm  
 Electron Configuration even  
 Minimum 0  
 Charge 1  
 Maximum 0  
 Maximum 3

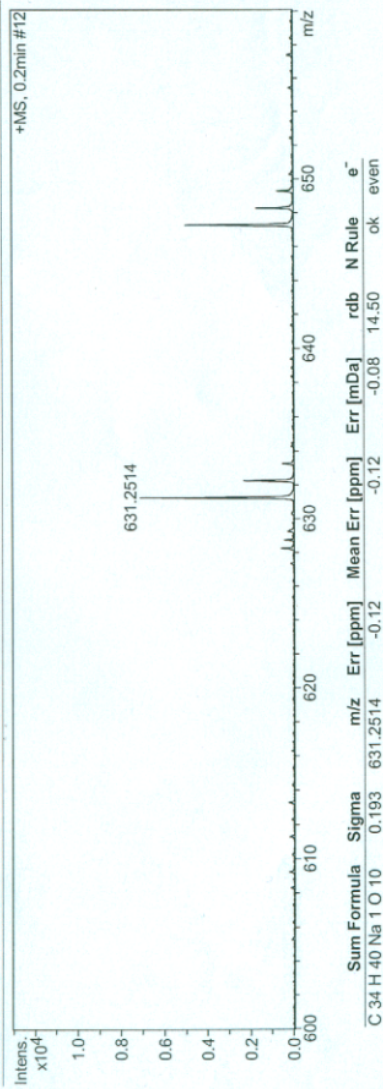

32.  $^1\text{H}$  NMR spectrum for compound **8** recorded in  $\text{CDCl}_3$  at 600 MHz.

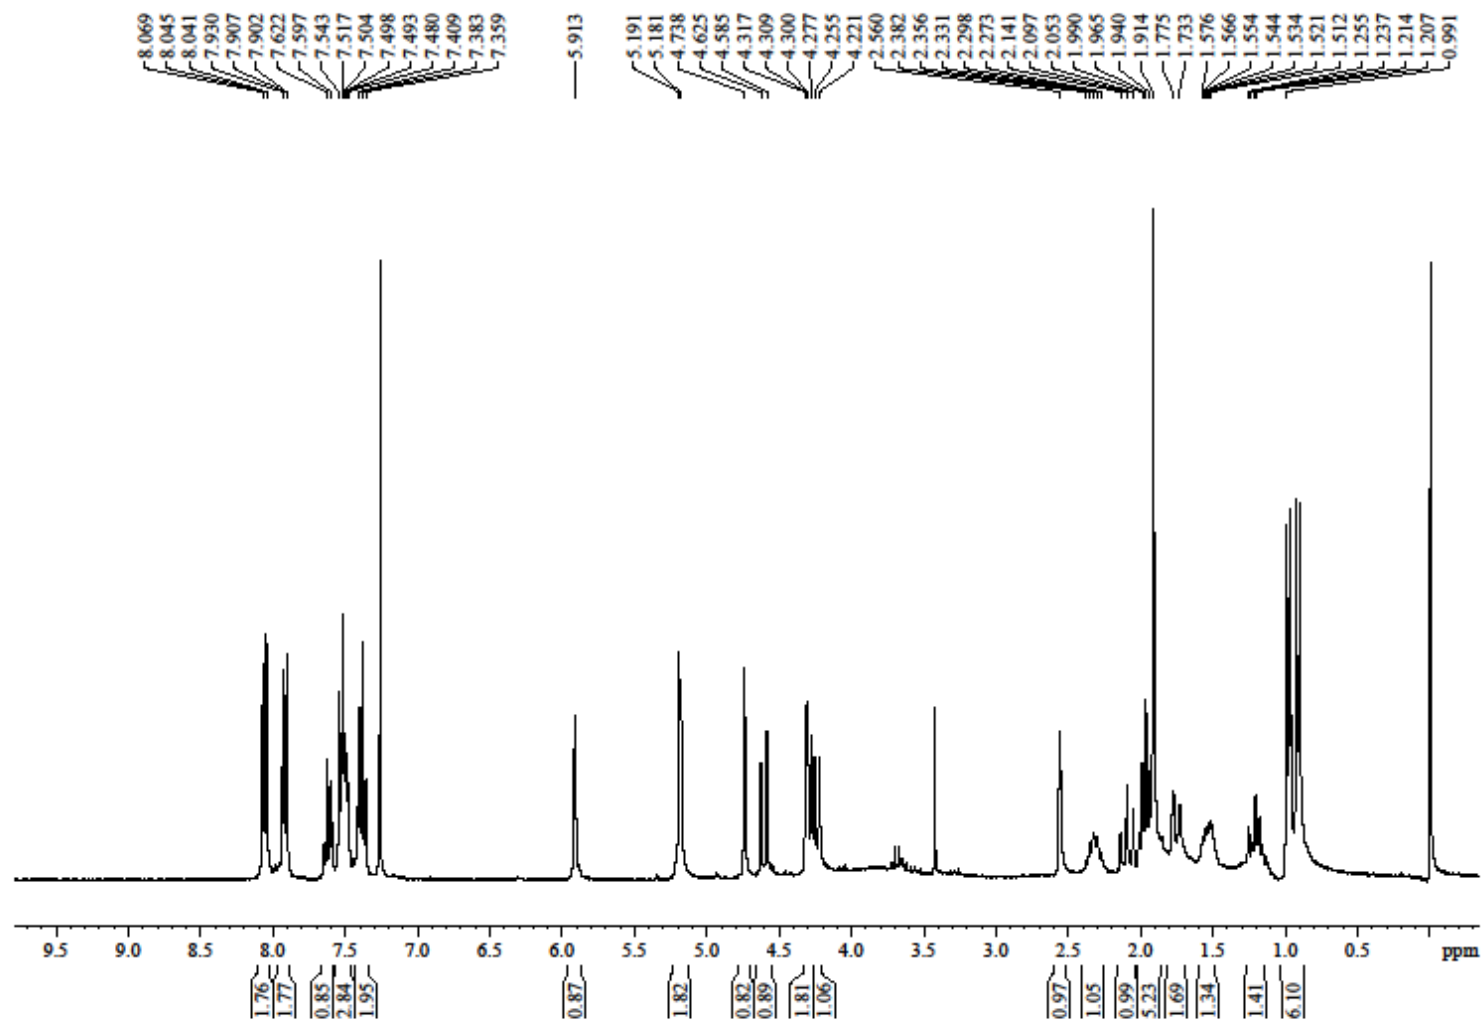

33.  $^{13}\text{C}$  NMR spectrum for compound **8** recorded in  $\text{CDCl}_3$  at 125 MHz.

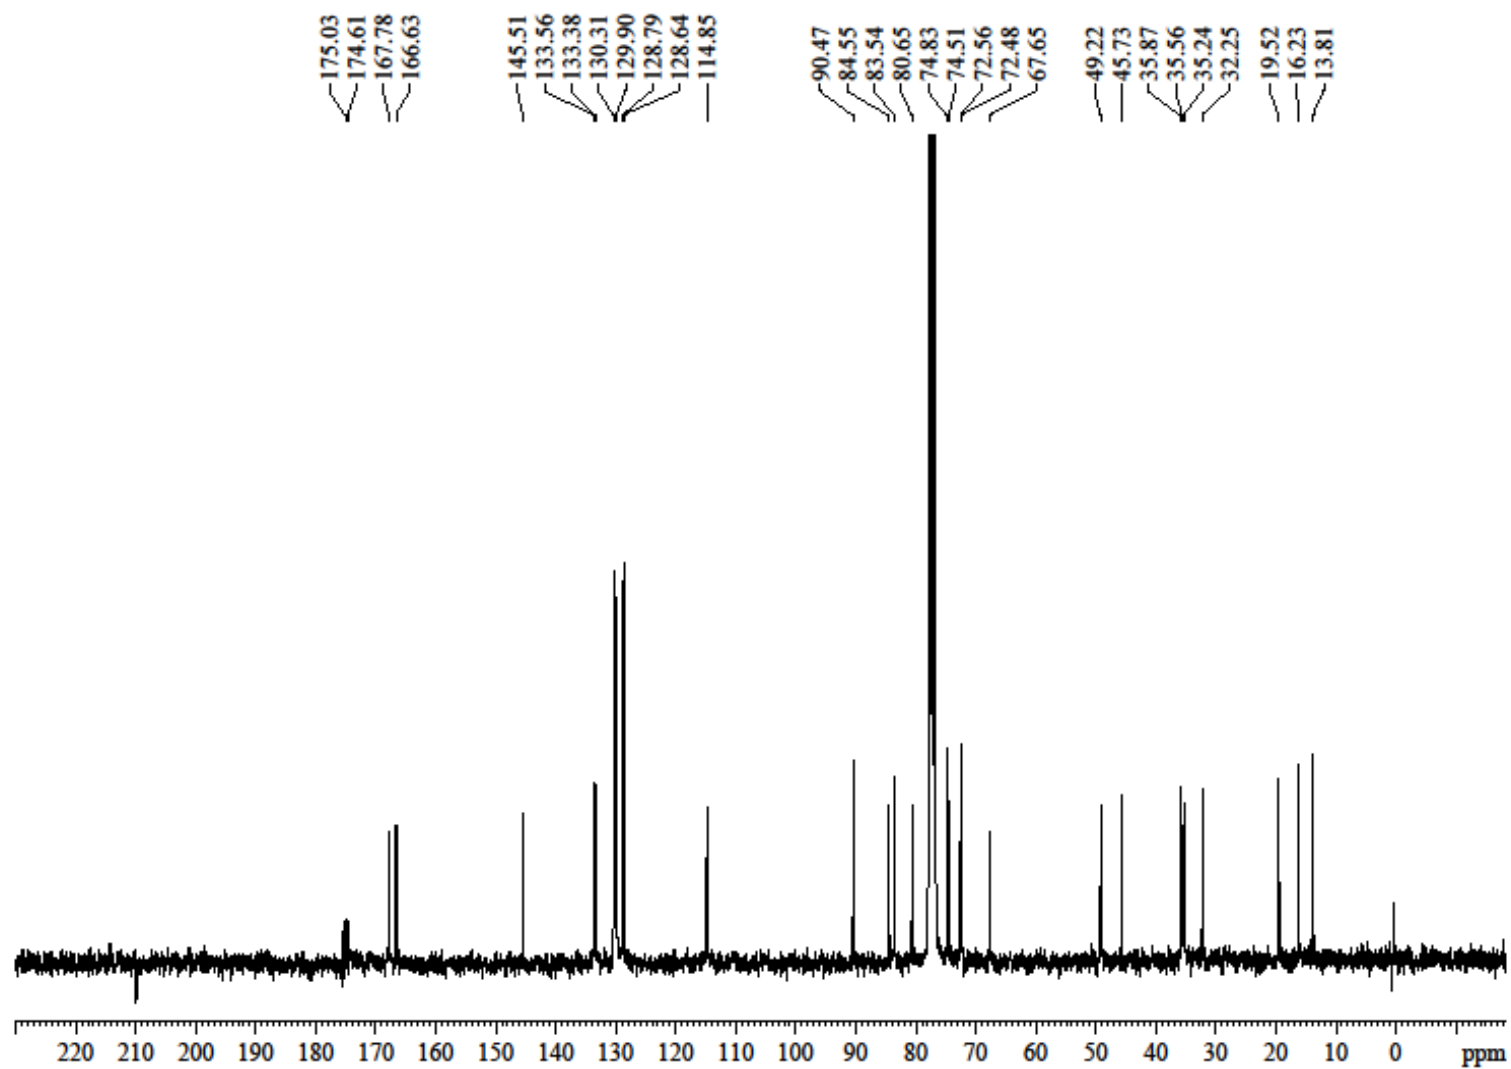

34. HSQC spectrum for compound **8** recorded in CDCl<sub>3</sub> at 600 MHz.

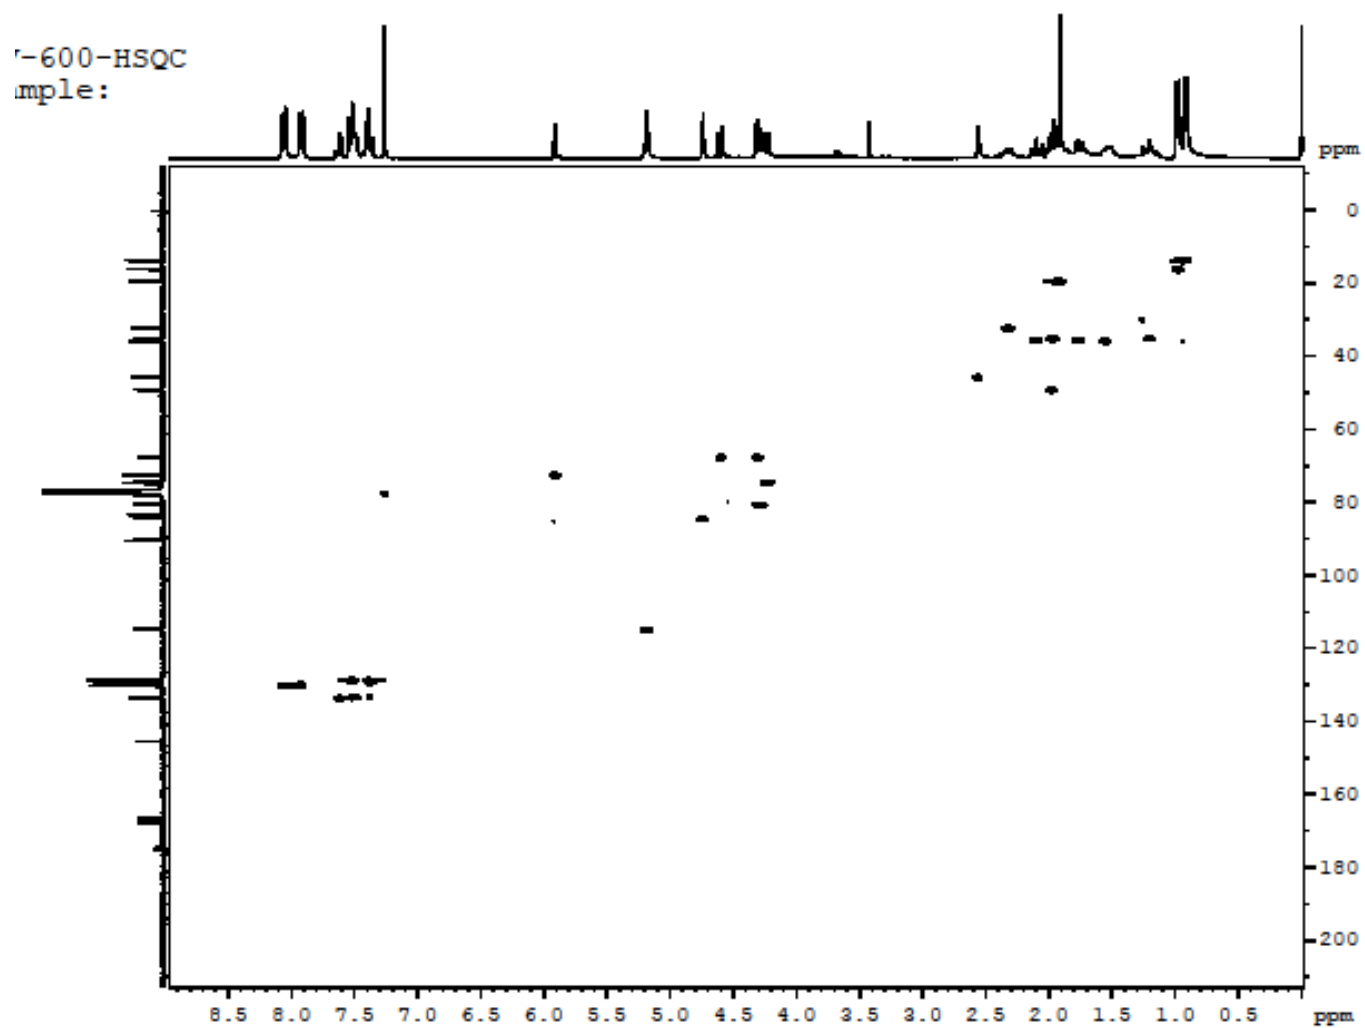

35.HMBC spectrum for compound **8** recorded in CDCl<sub>3</sub> at 600 MHz.

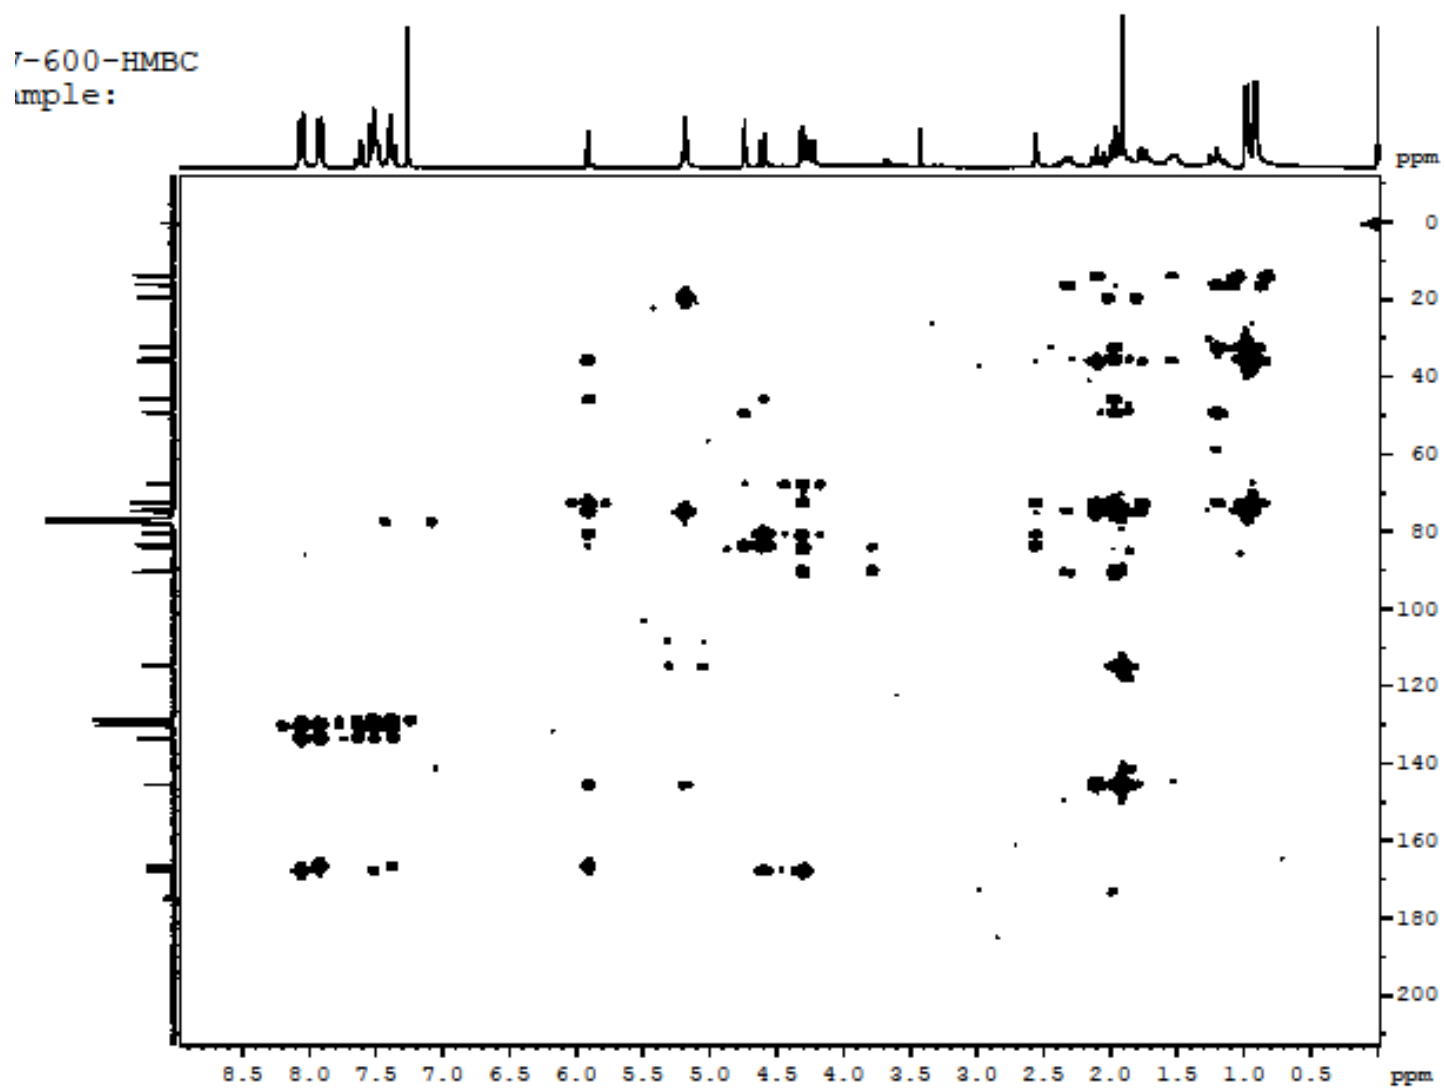

36.NOESY spectrum for compound **8** recorded in CDCl<sub>3</sub> at 600 MHz.

AV-600-NOESY  
Sample:

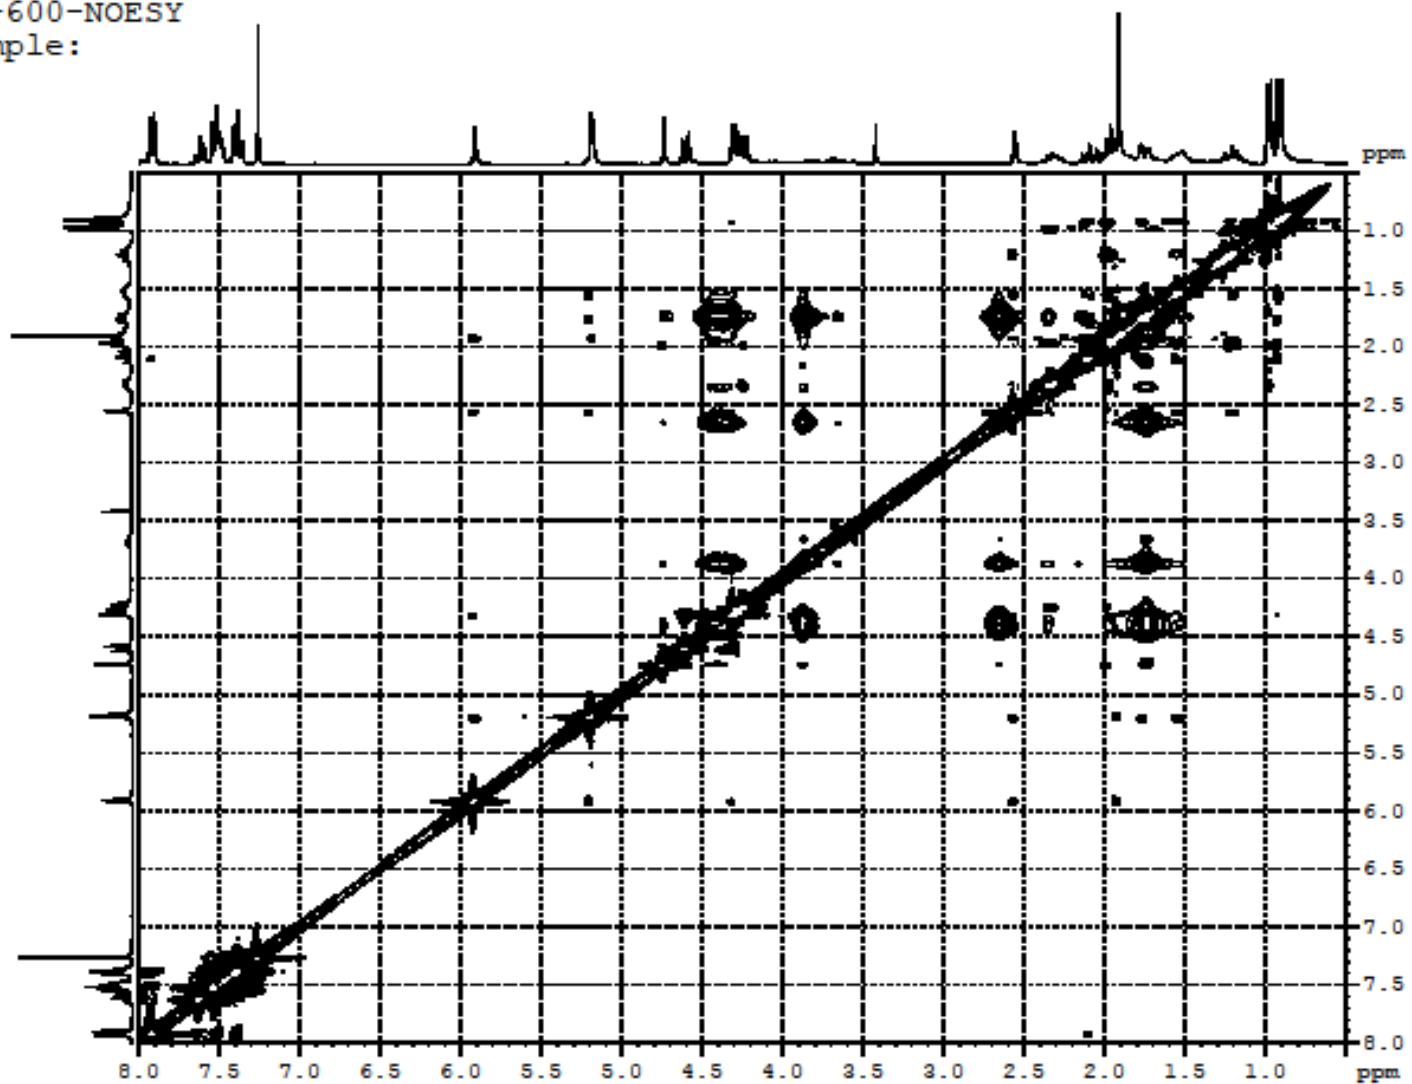

37. HRESIMS spectrum for compound 8.

Compound Mass Spectrum List Report

Analysis Info  
 Analysis Name D:\data\songs\haoliang\plotfiles\YH-22-B.d  
 Method tune\_low.m  
 Sample Name 3(c)-1.5h-MS  
 Comment

Acquisition Date 2008-7-7 18:01:16  
 Operator Bruker Customer  
 Instrument / Ser# mriOTOF-Q 125

Acquisition Parameter

|             |          |                       |           |                  |           |
|-------------|----------|-----------------------|-----------|------------------|-----------|
| Source Type | ESI      | Ion Polarity          | Positive  | Set Nebulizer    | 0.4 Bar   |
| Focus       | Active   | Set Capillary         | 4500 V    | Set Dry Header   | 190 °C    |
| Scan Begin  | 100 m/z  | Set End Plate Offset  | -500 V    | Set Dry Gas      | 4.0 l/min |
| Scan End    | 1000 m/z | Set Collision Cell P1 | 200.0 Vpp | Set Divert Valve | Source    |

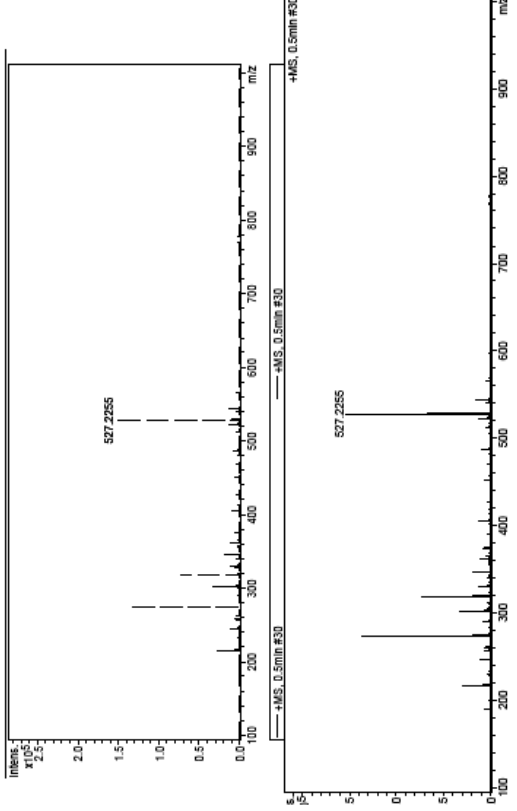

| # | m/z      | I      |
|---|----------|--------|
| 1 | 527.2255 | 153669 |
| 1 | 527.2255 | 153669 |

  

| Sum Formula                                                    | Sigma | m/z      | Err (ppm) | Mean Err (ppm) | Err (mDa) | rd   | N Rule | e    |
|----------------------------------------------------------------|-------|----------|-----------|----------------|-----------|------|--------|------|
| C <sub>27</sub> H <sub>36</sub> Na <sub>2</sub> O <sub>9</sub> | 0.153 | 527.2252 | -0.75     | -0.75          | -0.39     | 9.50 | OK     | even |



38.  $^1\text{H}$  NMR spectrum for compound **8** recorded in  $\text{CDCl}_3$  at 600 MHz.

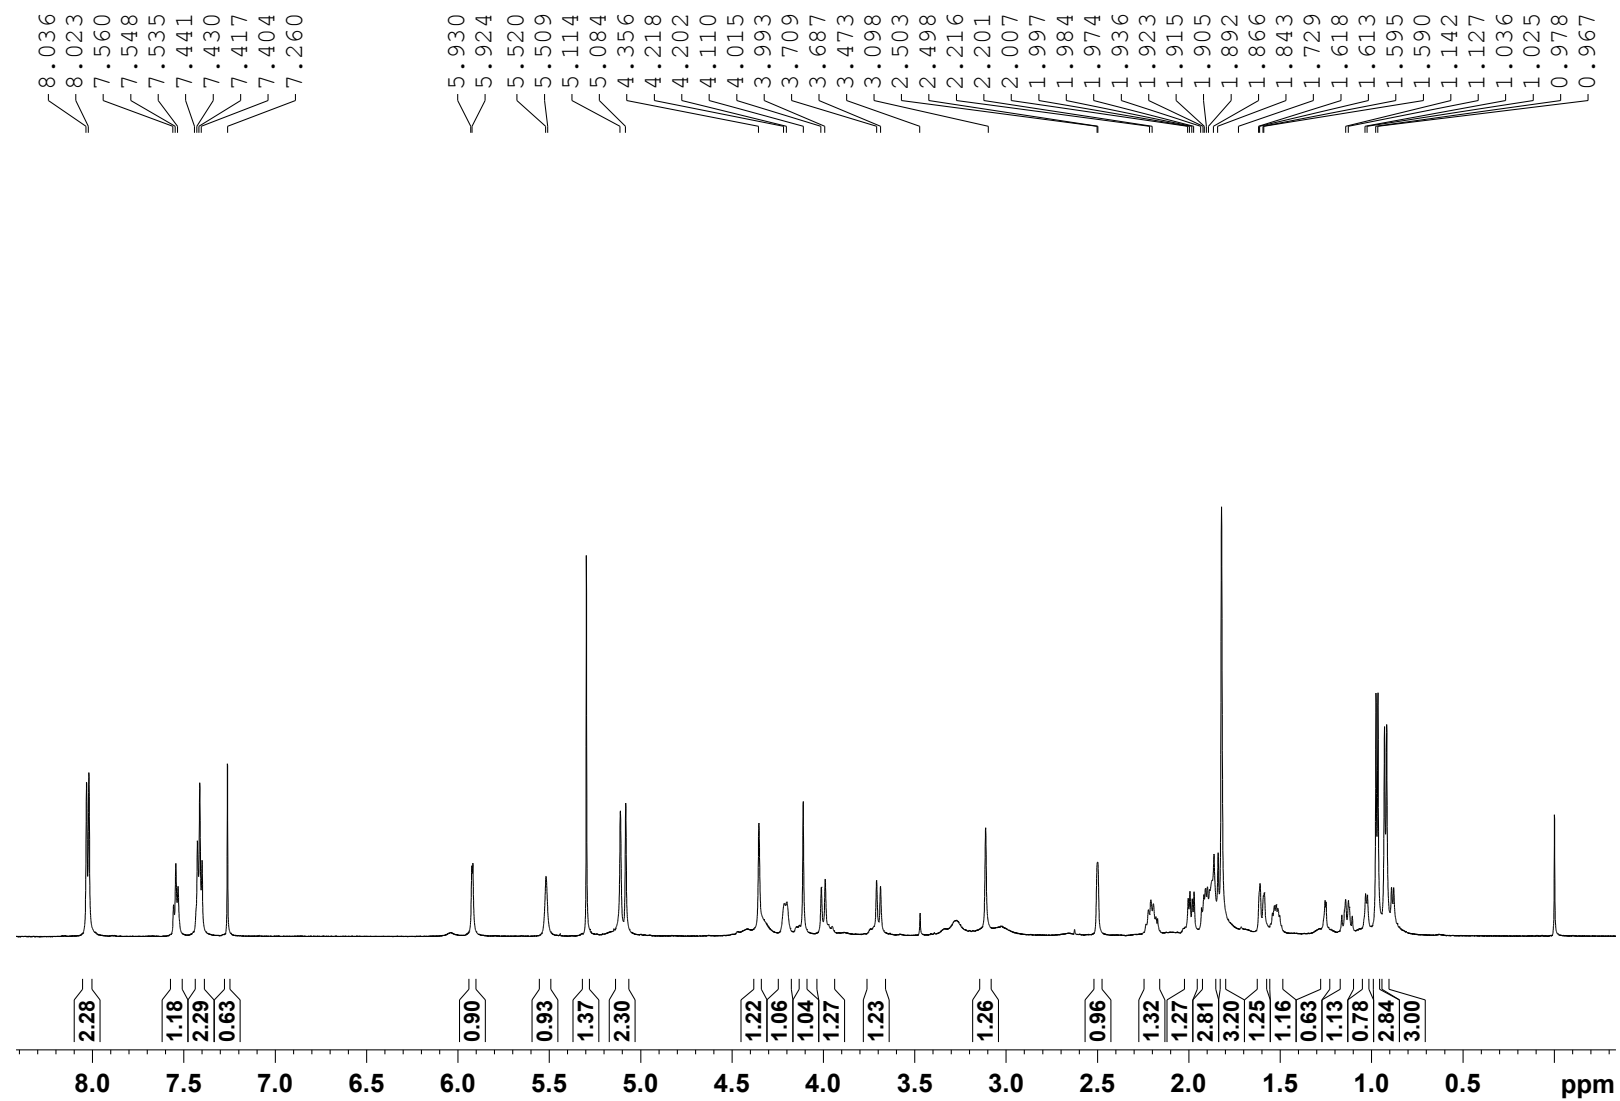

39.  $^{13}\text{C}$  NMR spectrum for compound **8** recorded in  $\text{CDCl}_3$  at 125 MHz.

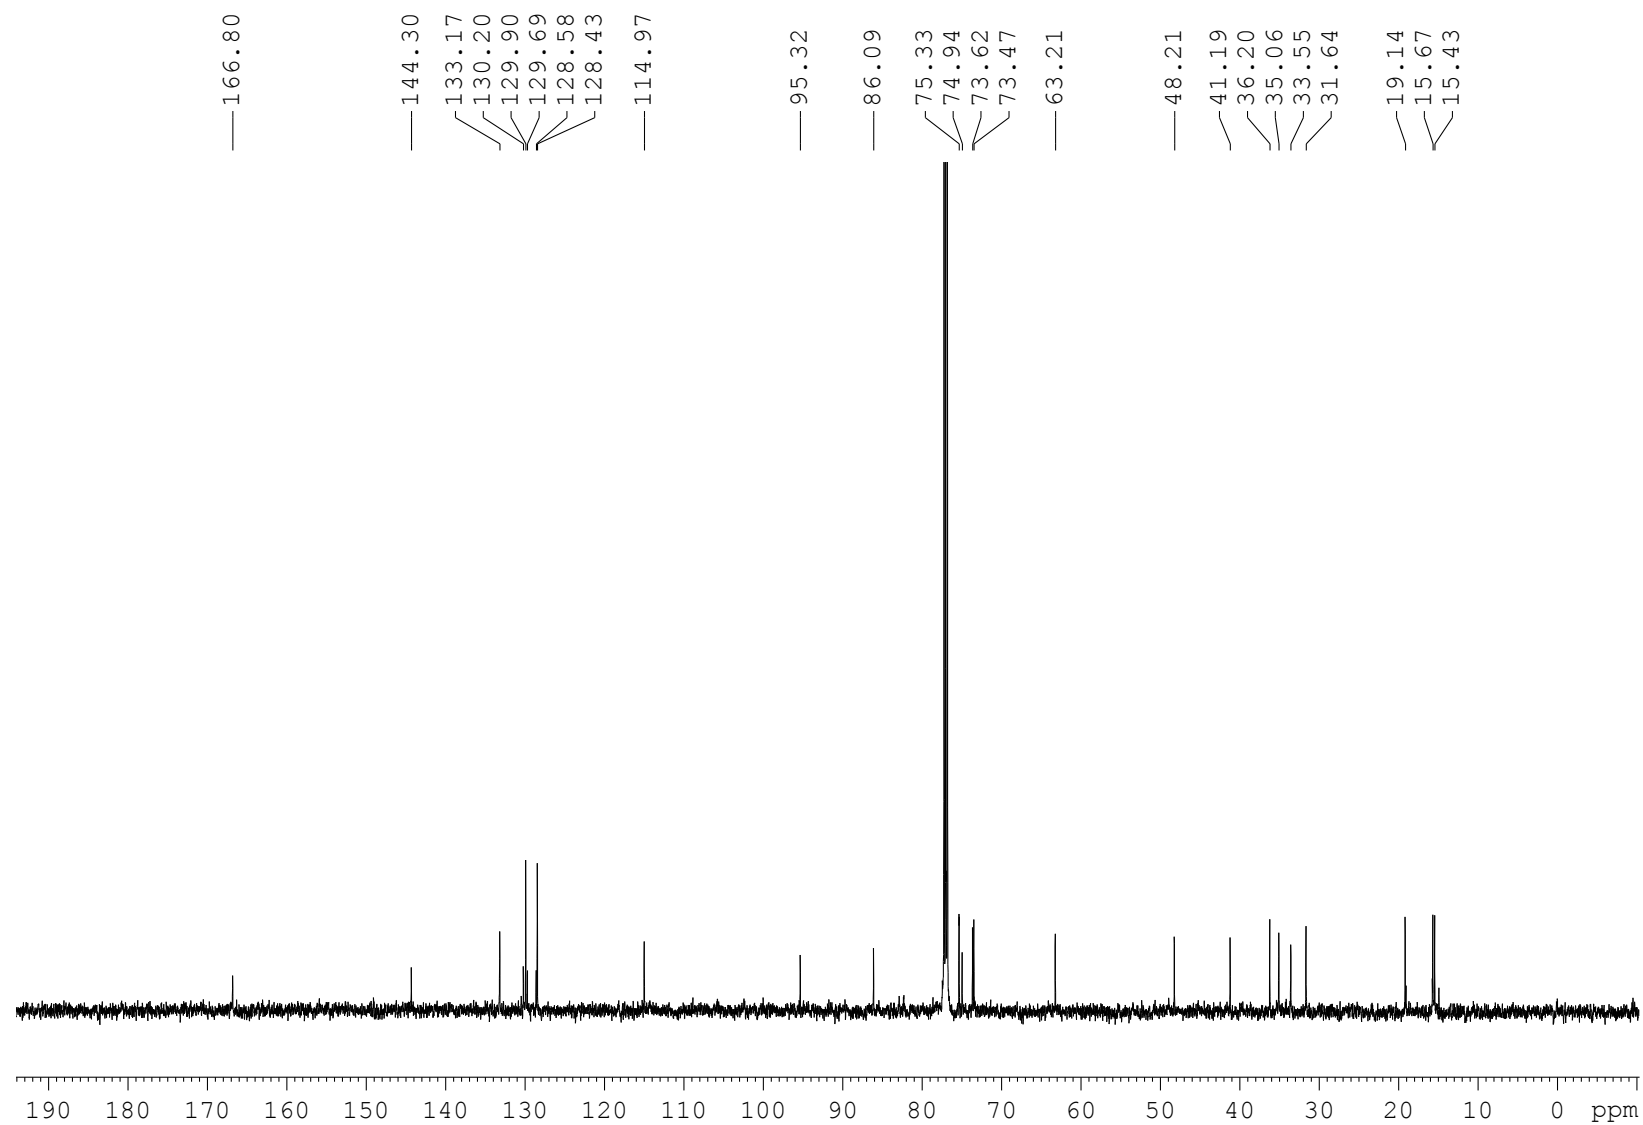

40. HSQC spectrum for compound **8** recorded in CDCl<sub>3</sub> at 600 MHz.

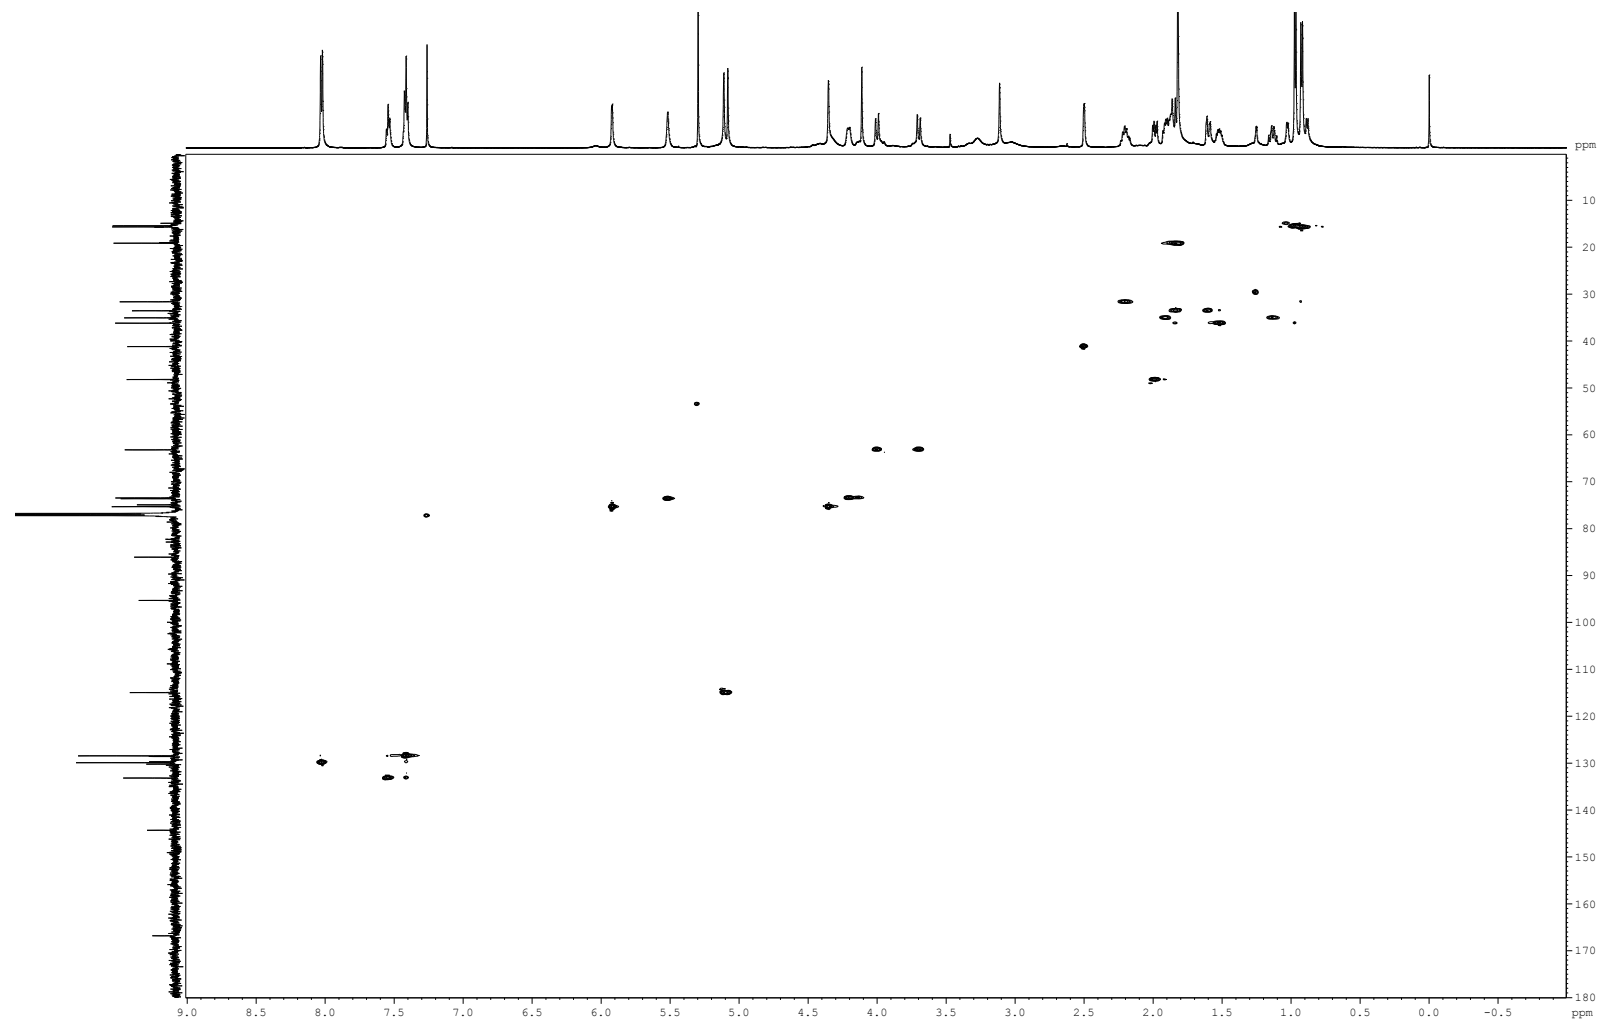

41.HMBC spectrum for compound **8** recorded in CDCl<sub>3</sub> at 600 MHz.

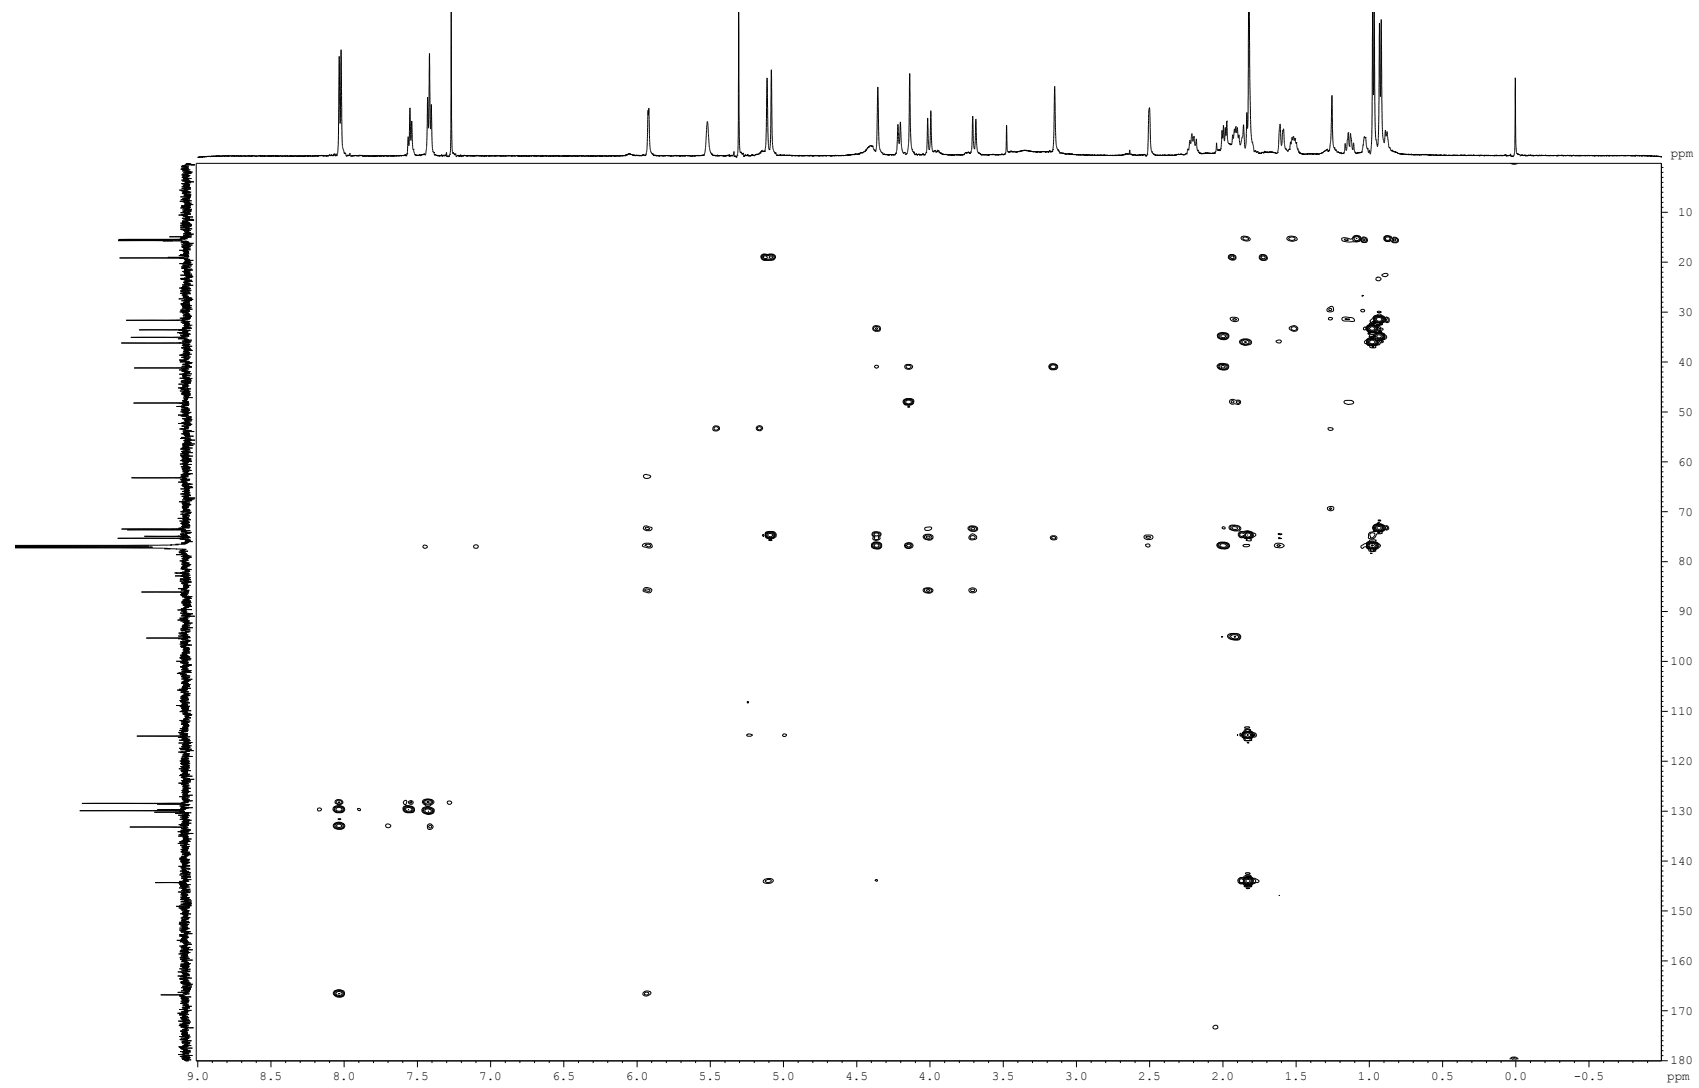

42.NOESY spectrum for compound **8** recorded in CDCl<sub>3</sub> at 600 MHz.

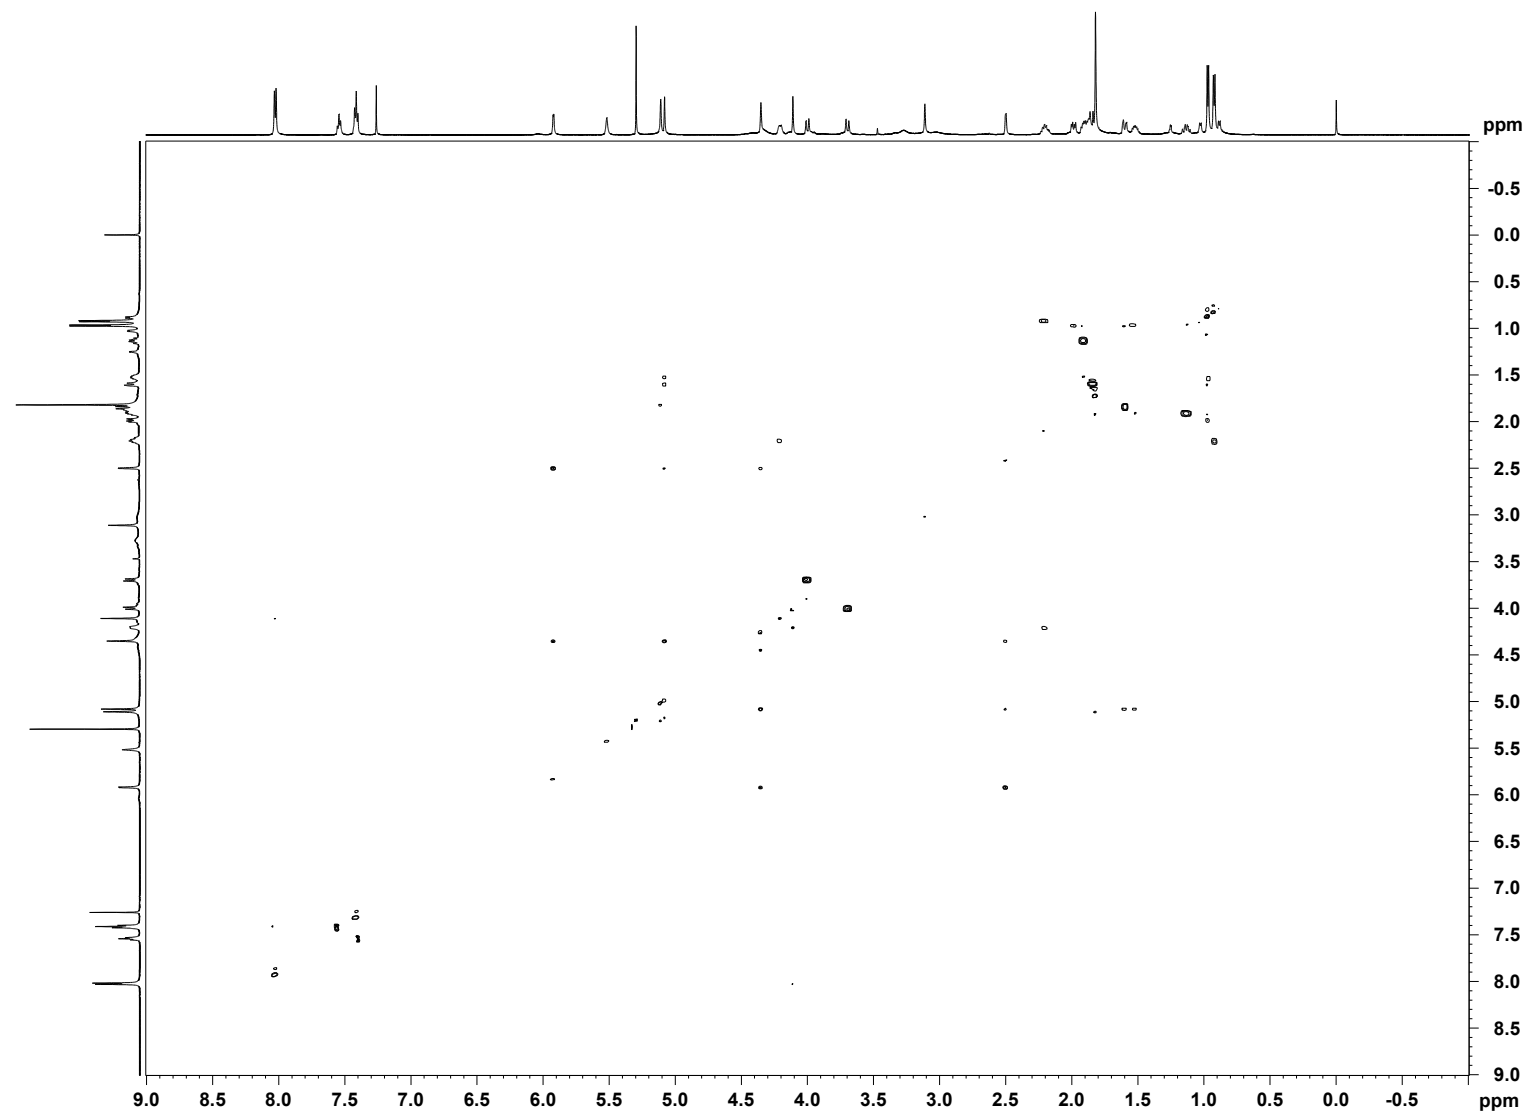

## 43. HRESIMS spectrum for compound 9.

---

**Mass Spectrum Molecular Formula Report**


---

**Analysis Info**

Analysis Name D:\Data\20140320ceyang\YHS-1\_1-b,1\_01\_2877.d  
 Method 20131026ceyang.m  
 Sample Name YHS-1  
 Comment

Acquisition Date 3/20/2014 3:04:23 PM

Operator Bruker Customer  
 Instrument / Ser# micrOTOF-Q 125

**Acquisition Parameter**

|             |          |                       |           |                  |           |
|-------------|----------|-----------------------|-----------|------------------|-----------|
| Source Type | ESI      | Ion Polarity          | Positive  | Set Nebulizer    | 1.2 Bar   |
| Focus       | Active   | Set Capillary         | 4500 V    | Set Dry Heater   | 180 °C    |
| Scan Begin  | 50 m/z   | Set End Plate Offset  | -500 V    | Set Dry Gas      | 8.0 l/min |
| Scan End    | 1000 m/z | Set Collision Cell RF | 300.0 Vpp | Set Divert Valve | Source    |

**Generate Molecular Formula Parameter**

|                  |            |                        |       |         |   |
|------------------|------------|------------------------|-------|---------|---|
| Formula, min.    | C20H32O8Na |                        |       |         |   |
| Formula, max.    |            |                        |       |         |   |
| Measured m/z     | 423.197    | Tolerance              | 5 ppm | Charge  | 1 |
| Check Valence    | no         | Minimum                | 0     | Maximum | 0 |
| Nitrogen Rule    | no         | Electron Configuration | both  |         |   |
| Filter H/C Ratio | no         | Minimum                | 0     | Maximum | 3 |
| Estimate Carbon  | yes        |                        |       |         |   |

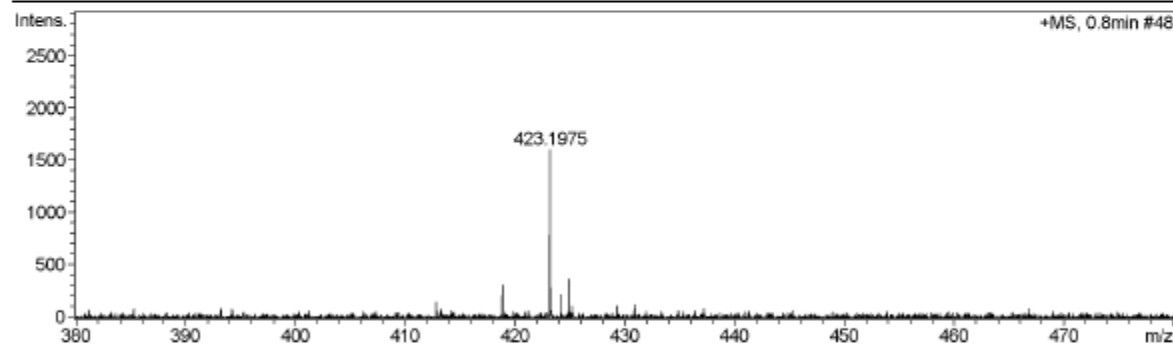

| Sum Formula                                                    | Sigma | m/z      | Err [ppm] | Mean Err [ppm] | Err [mDa] | rdb  | N Rule | e <sup>-</sup> |
|----------------------------------------------------------------|-------|----------|-----------|----------------|-----------|------|--------|----------------|
| C <sub>20</sub> H <sub>32</sub> Na <sub>1</sub> O <sub>8</sub> | 0.052 | 423.1989 | 3.36      | 3.09           | 1.42      | 4.50 | ok     | even           |

44.  $^1\text{H}$  NMR spectrum for compound **9** recorded in  $\text{CDCl}_3$  at 600 MHz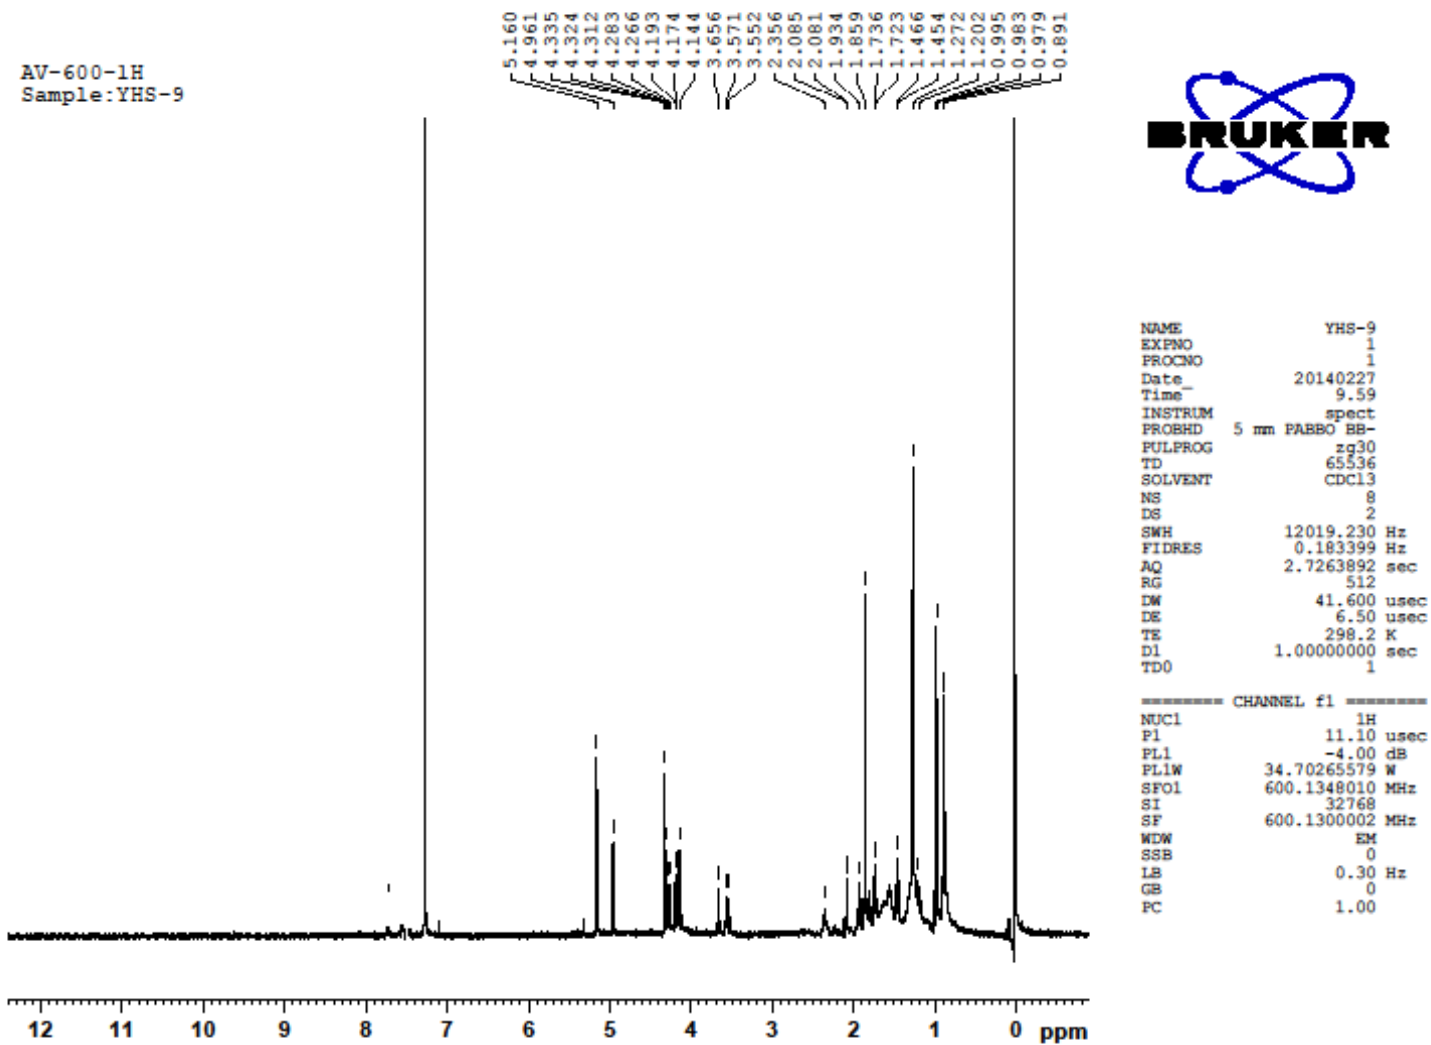

45.  $^{13}\text{C}$  NMR spectrum for compound **9** recorded in  $\text{CDCl}_3$  at 125 MHz.

AV-600-13C  
Sample:YHS-9

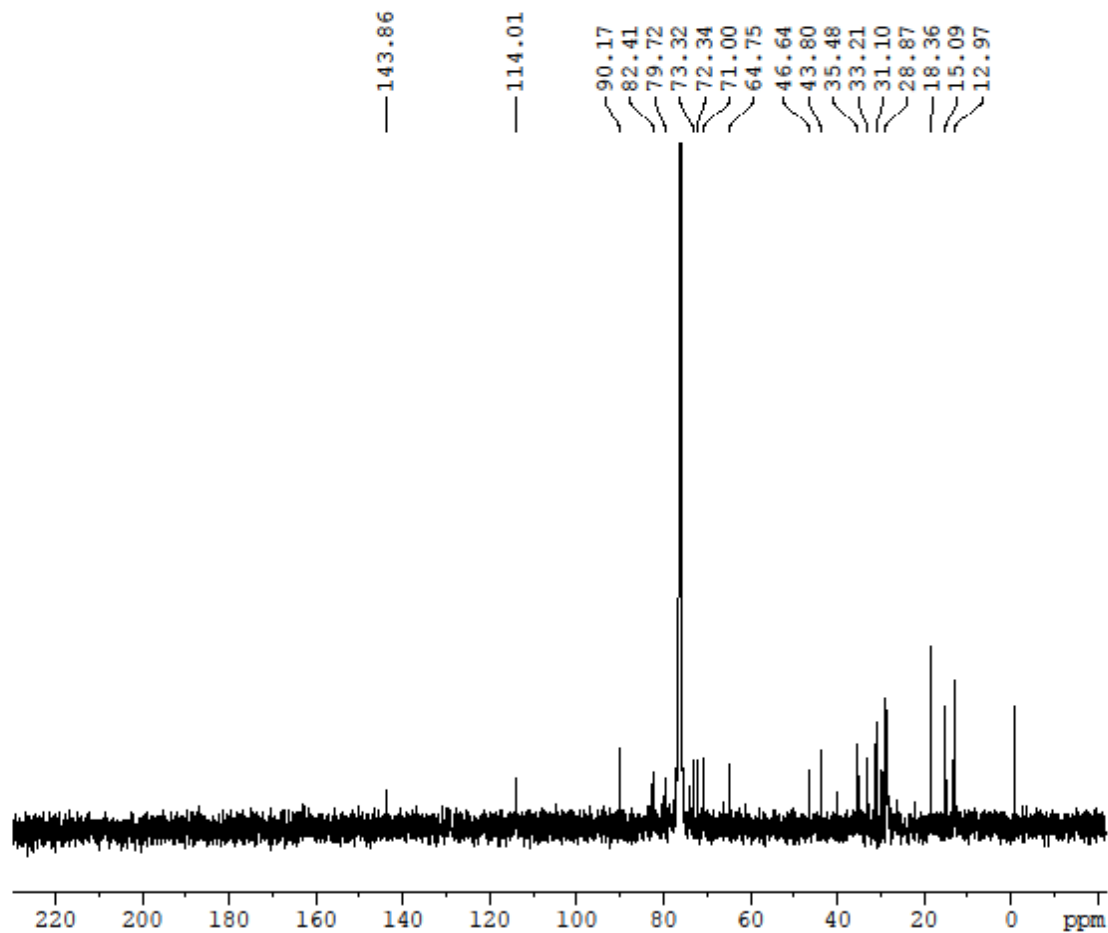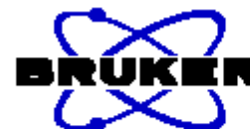

```

NAME          YHS-9(2)
EXPNO         2
PROCNO        1
Date_         20140624
Time          7.53
INSTRUM       spect
PROBHD        5 mm PABBO BB-
PULPROG       zgpg30
TD            65536
SOLVENT       CDCl3
NS            13757
DS            2
SWH           45454.547 Hz
FIDRES        0.693581 Hz
AQ            0.7209570 sec
RG            23100
DW            11.000 usec
DE            6.50 usec
TE            296.6 K
D1            2.00000000 sec
D11           0.03000000 sec
TD0           1
  
```

```

===== CHANNEL #1 =====
NUC1          13C
P1            6.00 usec
PL1           1.00 dB
PL1W          83.20243835 W
SFO1          150.9178993 MHz
  
```

```

===== CHANNEL #2 =====
CPDPRG2       waltz16
NUC2          1H
PCPD2         80.00 usec
PL2           -4.00 dB
PL12          13.16 dB
PL13          16.00 dB
PL2W          34.70265579 W
PL12W         0.66736388 W
PL13W         0.34702653 W
SFO2          600.1324005 MHz
SI            32768
SF            150.9029343 MHz
WDW           EM
SSB           0
LB            3.00 Hz
GB            0
PC            1.40
  
```



46. CD spectrum for compounds **1-8**.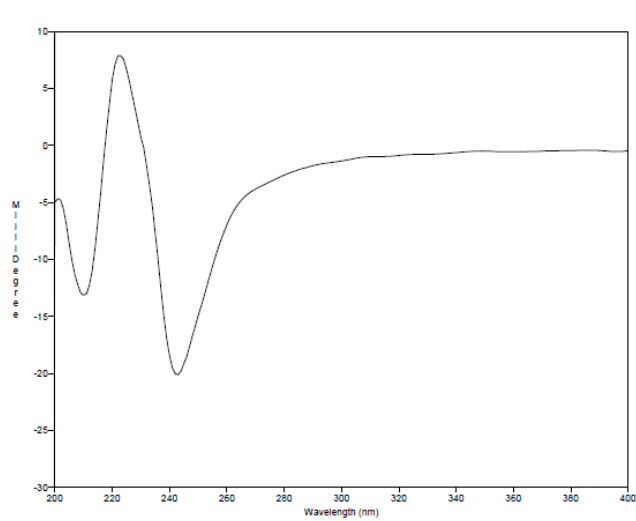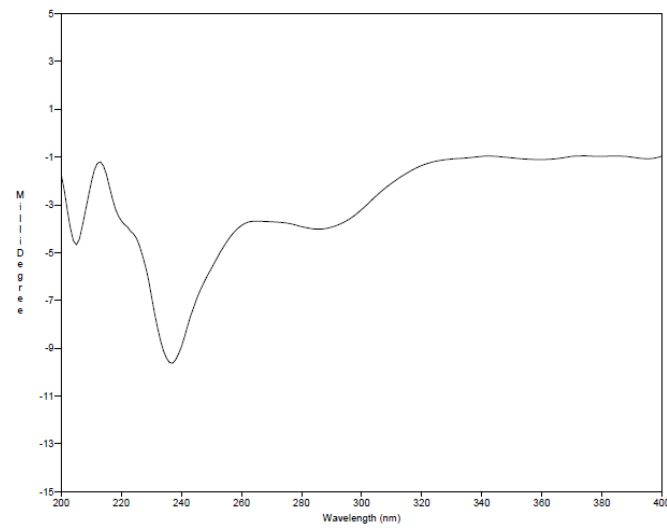CD spectrum for compound **1** . CD spectrum for compound **2**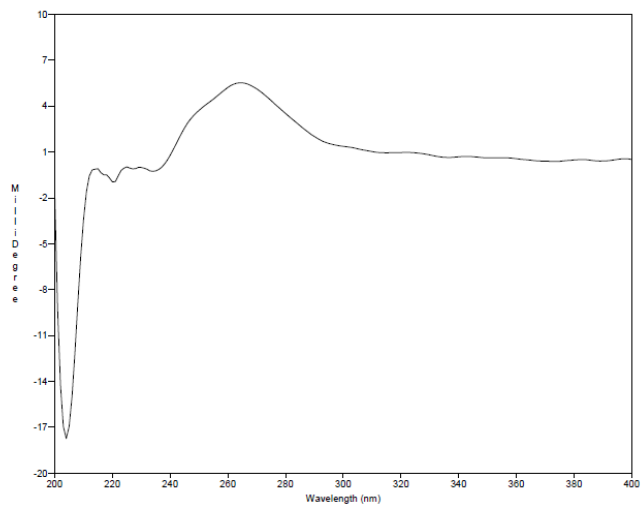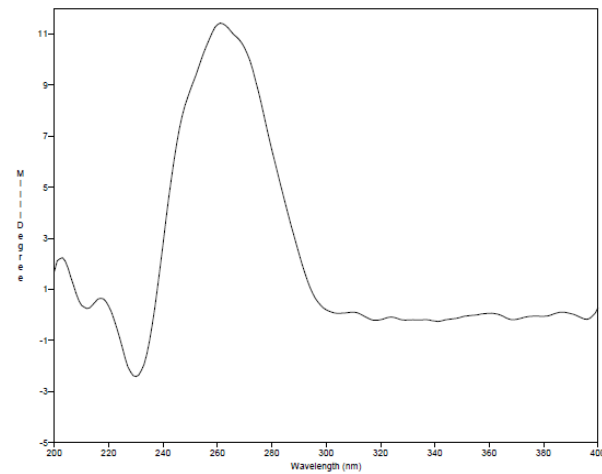CD spectrum for compound **3** . CD spectrum for compound **4** .

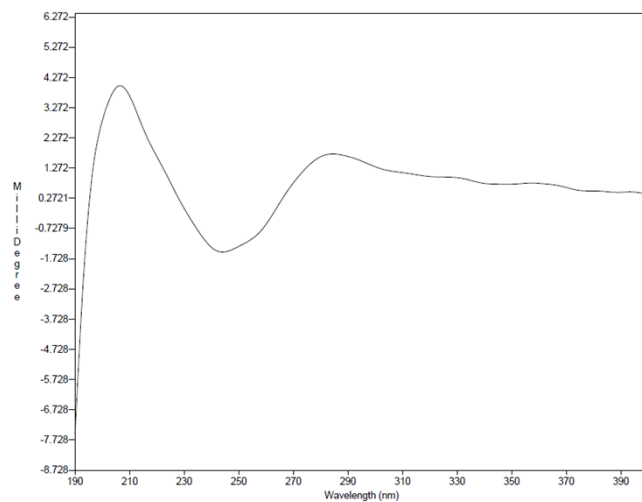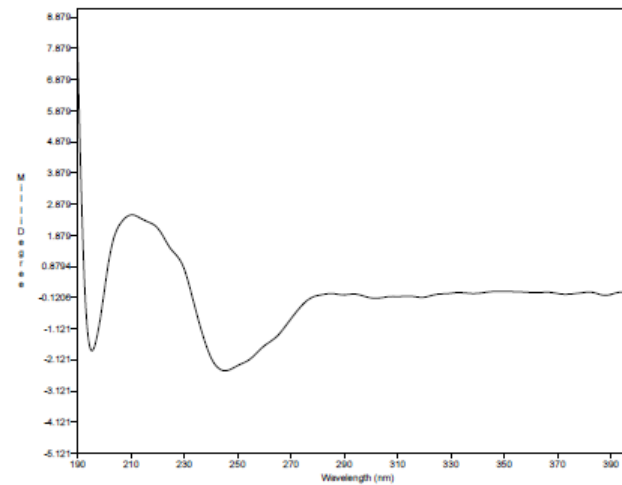

CD spectrum for compound 5 .CD spectrum for compound 6 .

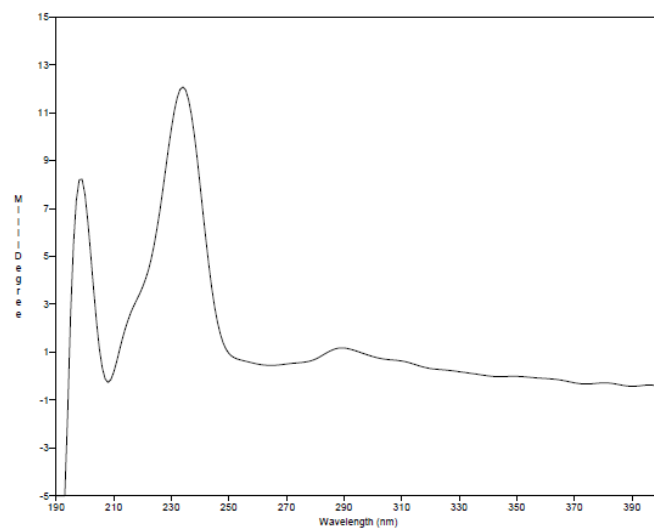

CD spectrum for compound 7 .

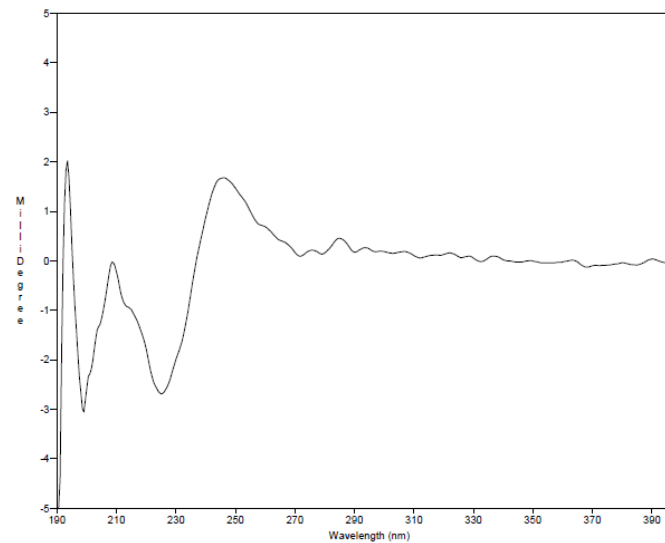

CD spectrum for compound 8

47. CD spectrum for the combination of several compounds  
CD spectrum for compounds **1,2** and **8**

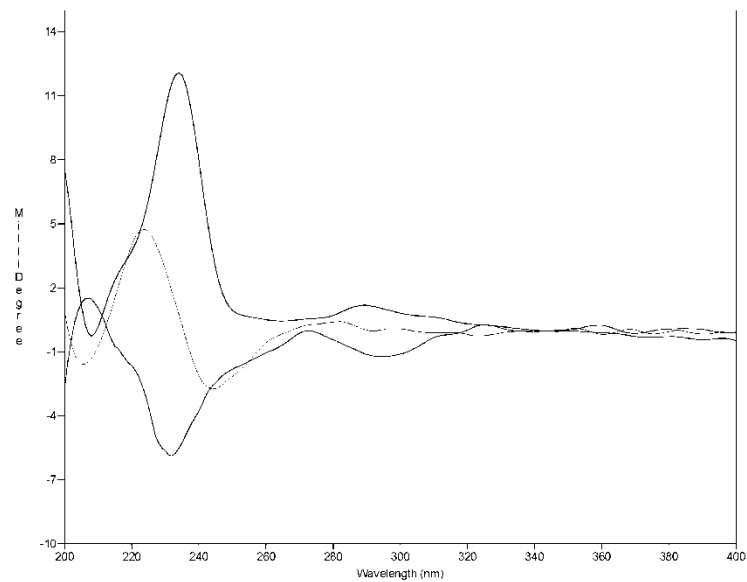

Bio-Kine Software V4.71 Date : 2014-4-1 Time : 9:31:10

**PLOT 1 COMMENTS :**

File name : d:\E307\yh-22-a.bka  
Savitzky-Golay Smooth of sav-golay  
Window Points=15  
Polynomial Order=3  
Derivative=0

**PLOT 2 COMMENTS :**

File name : d:\E307\yh-22-d.bka  
Savitzky-Golay Smooth of sav-golay  
Window Points=15  
Polynomial Order=3  
Derivative=0

**PLOT 3 COMMENTS :**

File name : d:\E307\yh-3--bka  
Savitzky-Golay Smooth of sav-golay  
Window Points=15  
Polynomial Order=3  
Derivative=0

CD spectrum for compounds **3** and **4**

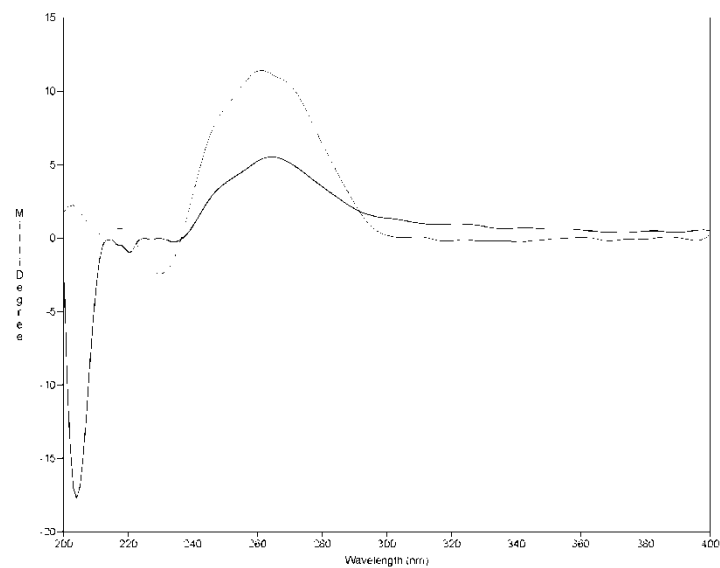

Bio-Kine Software V4.71 Date : 2014-4-1 Time : 11:01:40

**PLOT 1 COMMENTS**

File name : d:\E307\yh-38-2.bka  
Savitzky-Golay Smooth of sav-golay  
Window Points=15  
Polynomial Order=3  
Derivative=0

**PLOT 2 COMMENTS**

File name : d:\E307\yh-38-4-1.bka  
Savitzky-Golay Smooth of sav-golay  
Window Points=15  
Polynomial Order=3  
Derivative=0

CD spectrum for compounds **5** and **6**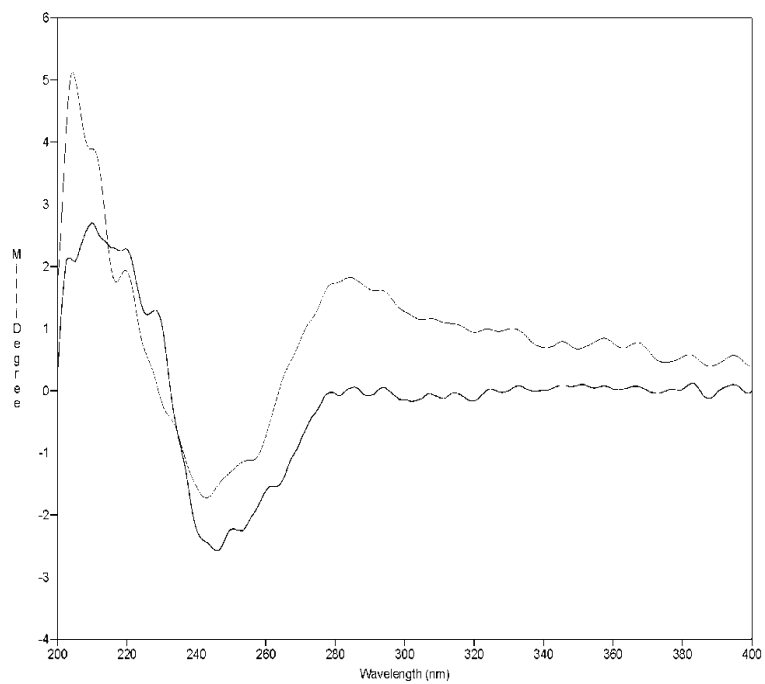

Bio-Kine Software V4.71 Date : 2014-4-1 Time : 11:02:34

## PLOT 1 COMMENTS :

File name : d:\李玲芝\39-1-14.bka  
Savitzky-Golay Smooth of sav-golay  
Window Points=15  
Polynomial Order=3  
Derivative=0

## PLOT 2 COMMENTS :

File name : d:\李玲芝\39-2-16.bka  
Savitzky-Golay Smooth of sav-golay  
Window Points=15

CD spectrum for compounds **8** and **8**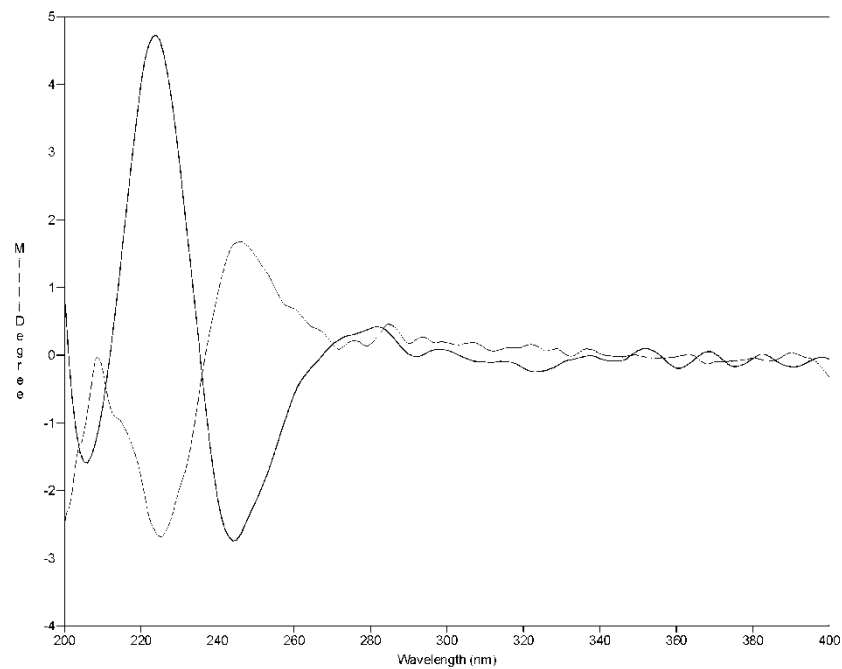

Bio-Kine Software V4.71 Date : 2014-4-1 Time : 9:37:59

## PLOT 1 COMMENTS :

File name : d:\李玲芝\22-b.bka  
Savitzky-Golay Smooth of sav-golay  
Window Points=15  
Polynomial Order=3  
Derivative=0

## PLOT 2 COMMENTS :

File name : d:\李玲芝\22-a.bka  
Savitzky-Golay Smooth of sav-golay  
Window Points=15  
Polynomial Order=3  
Derivative=0

## 48. Stereoviews of compounds 1-8

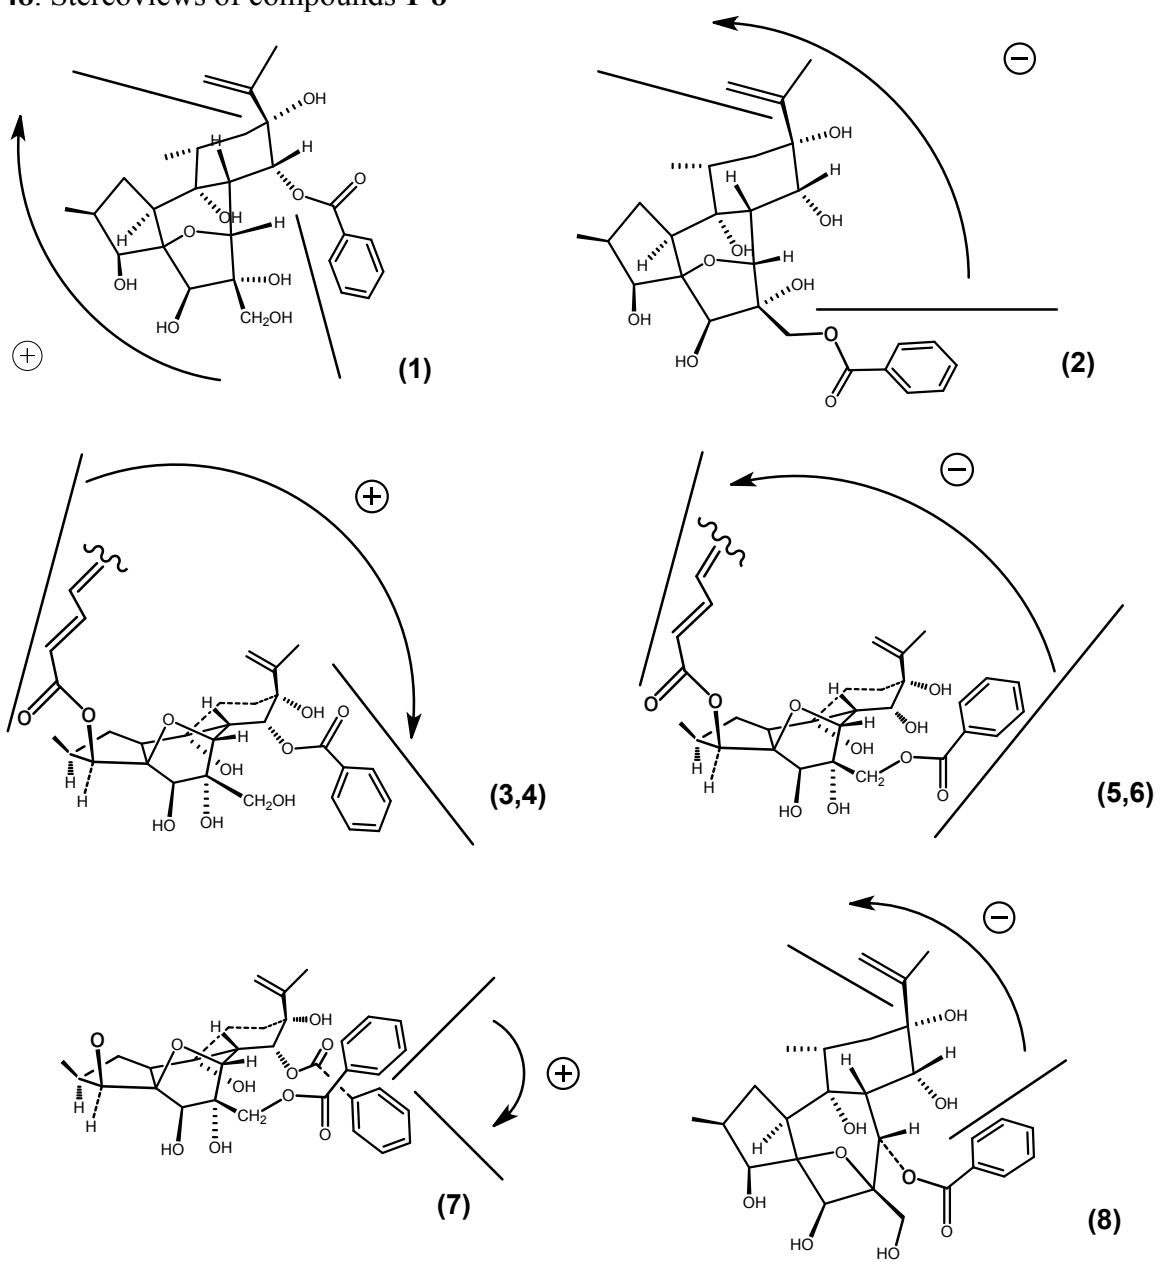

Supplement: c4ra13167c1.pdf [file c4ra13167c1.pdf]
